# Supplementary material for: Transcriptome Analysis of the Developmental Effects of Bisphenol F Exposure in Chinese Medaka (Oryzias sinensis)
Source: MDPI journal article supplement (doi:10.3390/ijms241310898), 2023-06-30
Supplement: s1 [file s1]

## Supplementary Information

# Transcriptome Analysis of the Developmental Effects of Bisphenol F Exposure in Chinese Medaka (*Oryzias sinensis*)

Zhiying Liang <sup>1,†</sup>, Yafen Guo <sup>1,†</sup>, Duan Pi <sup>1,†</sup>, Xiang Li <sup>1,†</sup>, Bingying Li <sup>1</sup>, Yongsu Huang <sup>1</sup>, Xiaohong Song <sup>2</sup>, Ramji Kumar Bhandari <sup>3</sup> and Xuegeng Wang <sup>1,\*</sup>

<sup>1</sup> Institute of Modern Aquaculture Science and Engineering, Guangdong-Macao Joint Laboratory for Aquaculture Breeding Development and Innovation, College of Life Sciences, South China Normal University, Guangzhou 510631, China

<sup>2</sup> The Guangxi Key Laboratory of Theory and Technology for Environmental Pollution Control, Guilin University of Technology, Guilin 541000, China

<sup>3</sup> Department of Biology, University of North Carolina Greensboro, Greensboro, NC 27412, USA

\* Correspondence: wangxuegeng@scnu.edu.cn

† These authors contributed equally to this work.

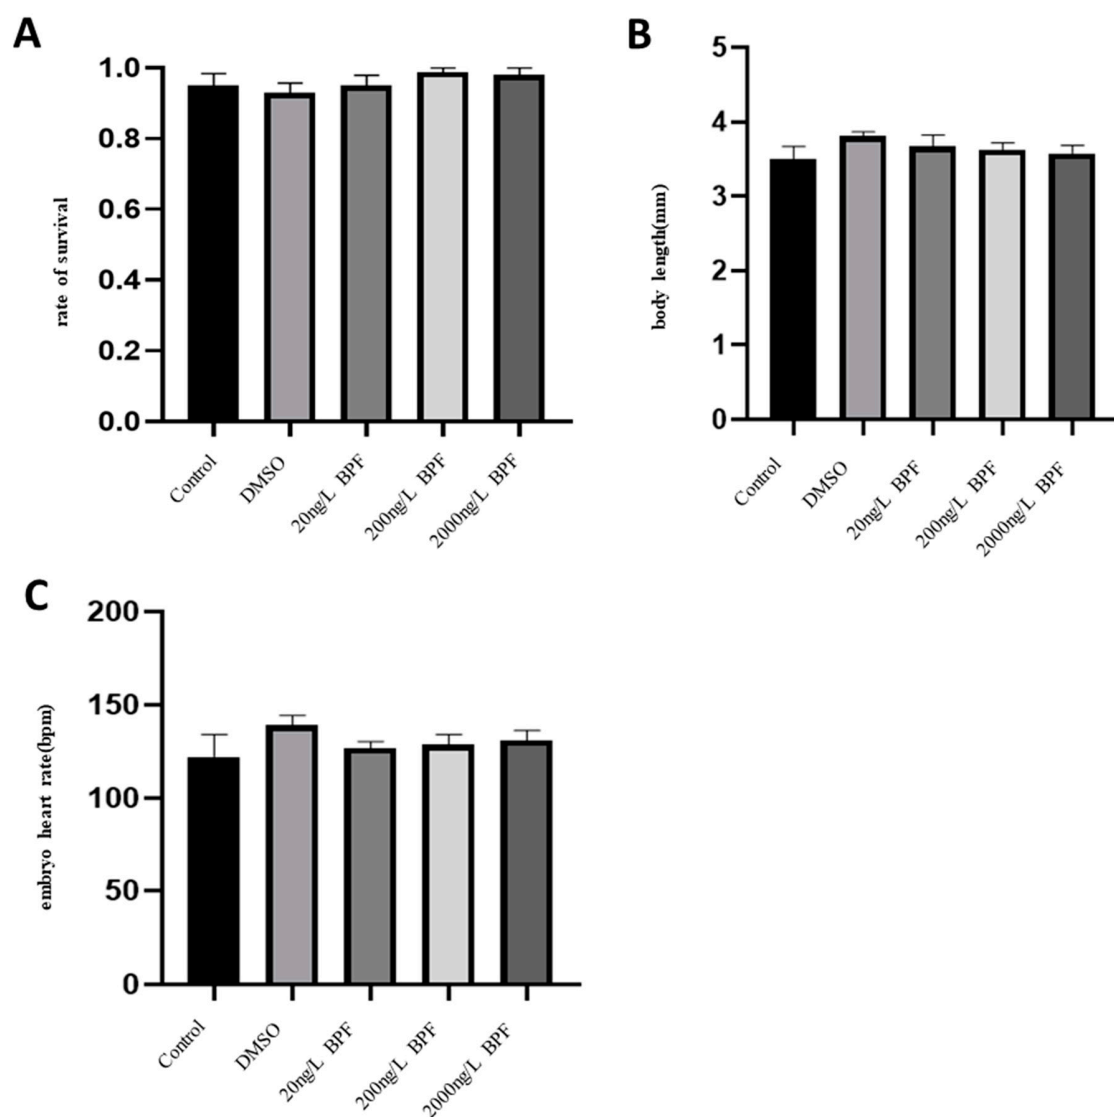

**Figure S1.** Results of developmental exposure. (A): Survival rates; (B): Body length (mm); (C): Embryo heart rate (bpm).

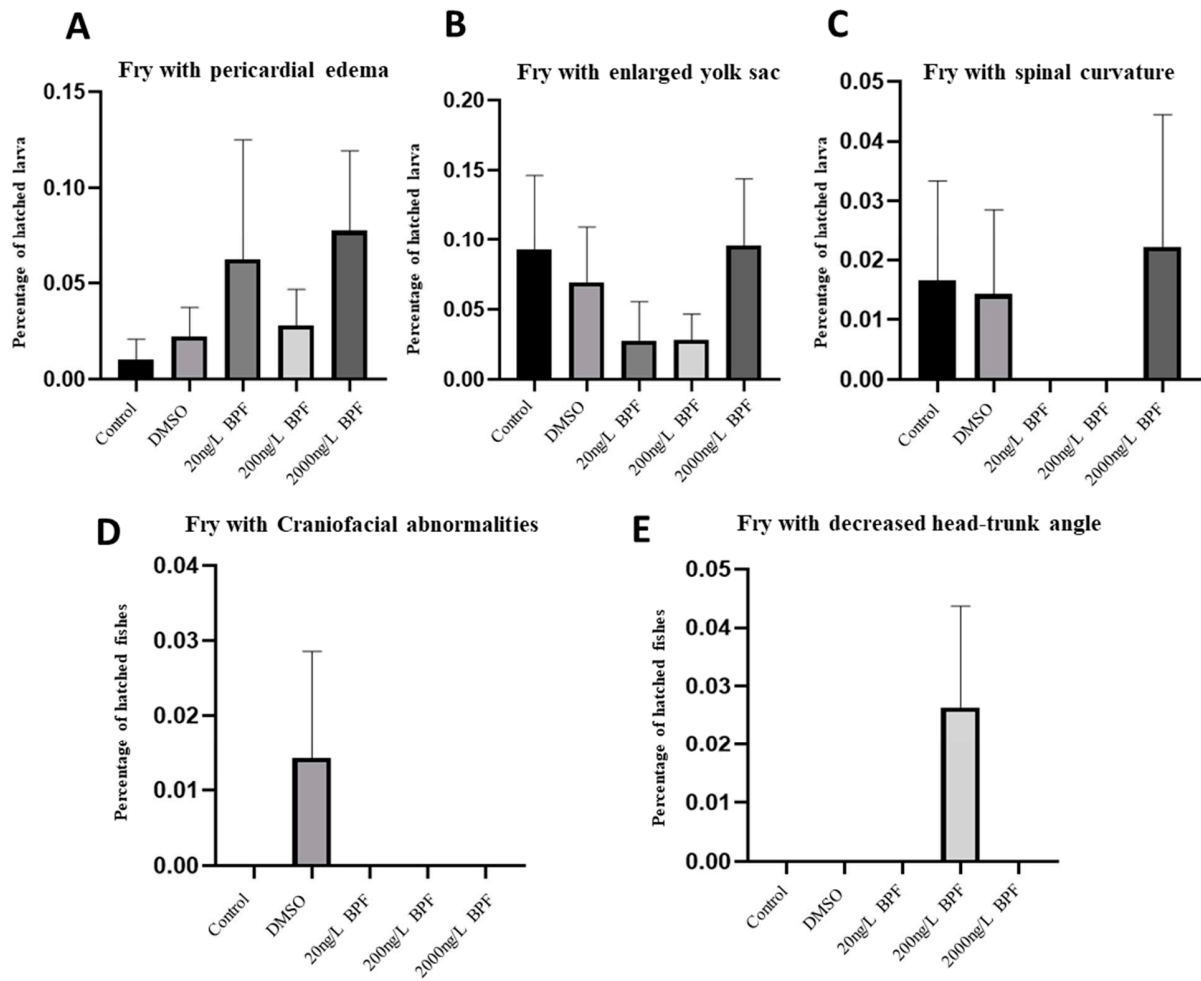

**Figure S2:** Percentage of larvae with abnormalities. (A): Fry with pericardial edema; (B): Fry with enlarged yolk sac; (C): Fry with spinal curvature; (D): Fry with craniofacial abnormalities; (E): Fry with decreased head-trunk angle.



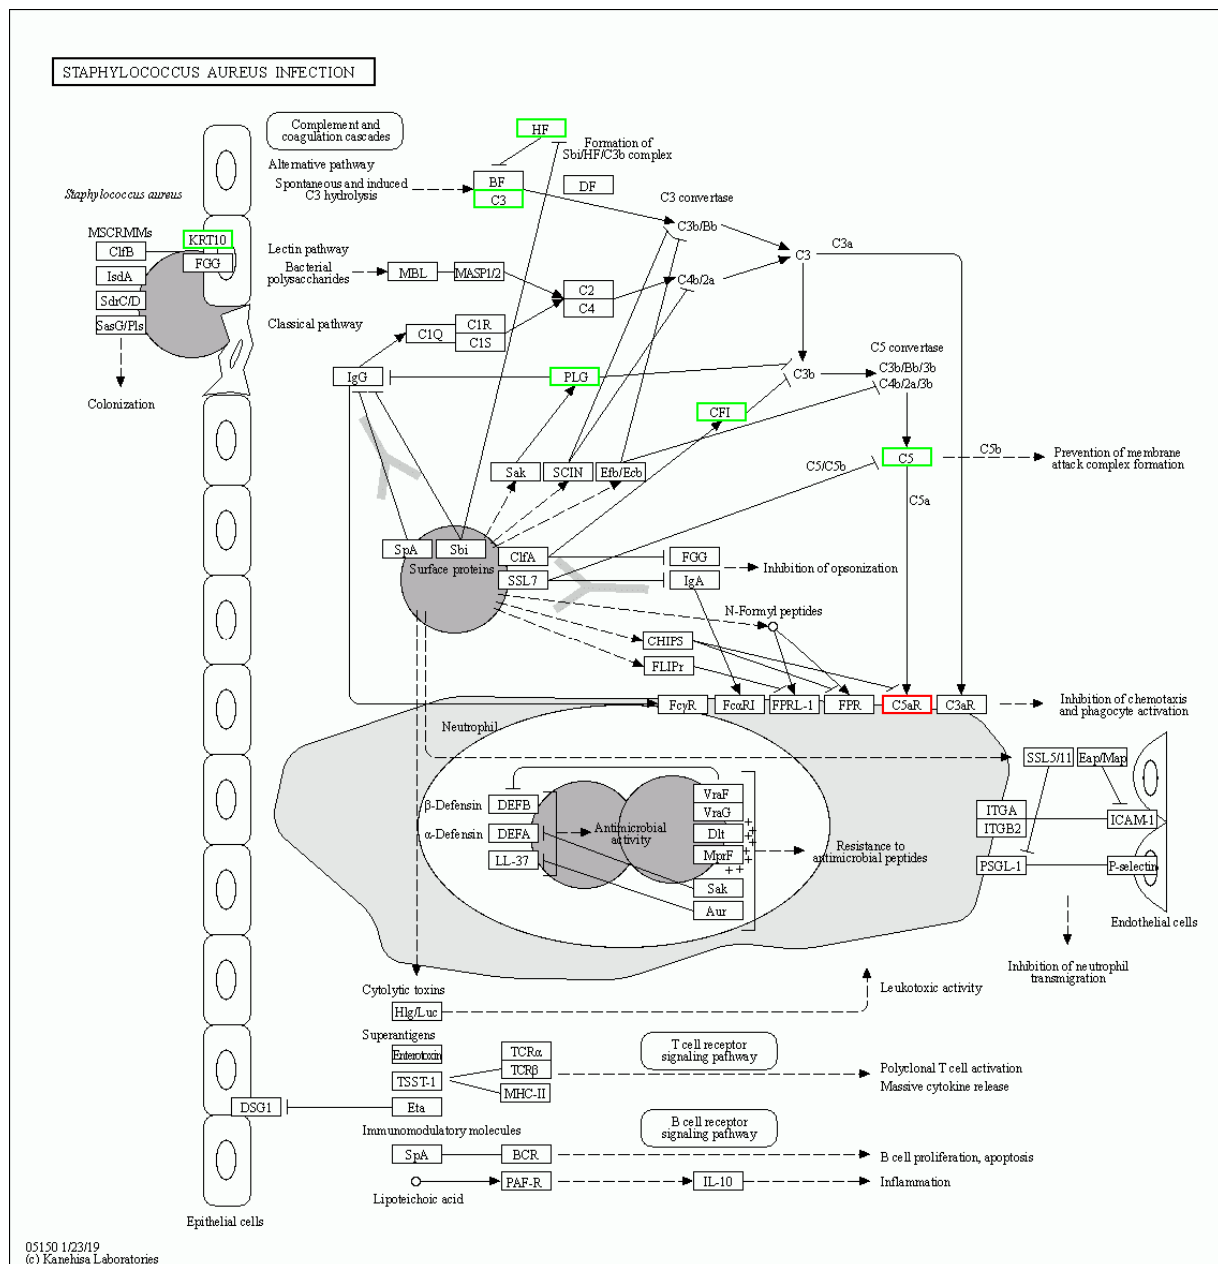

**Figure S4:** Staphylococcus aureus infection pathway. Green indicates down-regulation DEGs, red indicates up-regulation DEGs.



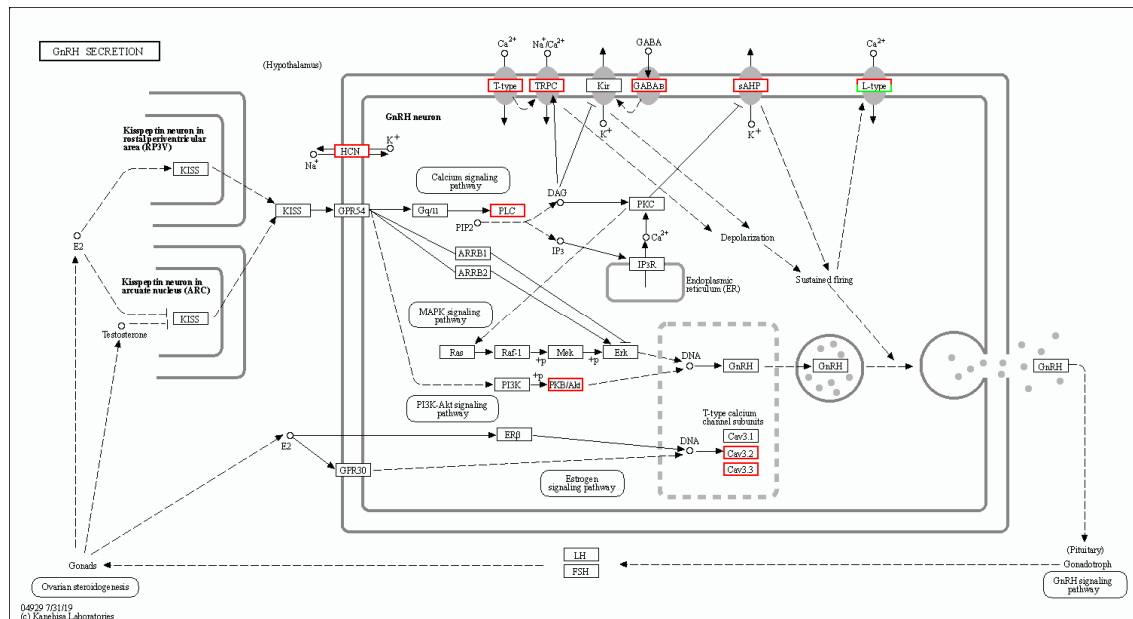

**Figure S6:** GnRH secretion pathway. Green indicates down-regulation DEGs; red indicates up-regulation DEGs.
