# Supplementary material for: Transcriptome Analysis of the Developmental Effects of Bisphenol F Exposure in Chinese Medaka (Oryzias sinensis)
Source: Int J Mol Sci. 2023 Jun 30;24(13):10898. doi: 10.3390/ijms241310898 (PMC10341846; doi:10.3390/ijms241310898)
Supplement: Supplementary file 1 [file ijms-24-10898-s001.zip]

Archive with 7 entries (7 files):
- ijms-2444678-supplementary.pdf
- Table S1 Summary of reads mapping.xlsx
- Table S2 DEGs.xlsx
- Table S3 GO Control vs BPF200.xlsx
- Table S4 GO Control vs BPF2000.xlsx
- Table S5 KEGG Control vs BPF200.xlsx
- Table S6 KEGG Control vs BPF2000.xlsx
