# Supplementary material for: Transcriptome Analysis of the Developmental Effects of Bisphenol F Exposure in Chinese Medaka (Oryzias sinensis)
Source: Int J Mol Sci. 2023 Jun 30;24(13):10898. doi: 10.3390/ijms241310898 (PMC10341846; doi:10.3390/ijms241310898)
Supplement: Supplementary file 1 [file ijms-24-10898-s001.zip › Table S1 Summary of reads mapping.xlsx]

## Sheet: Sheet1
Table S1: Summary of reads mapping
Sample	Group	Raw reads	Clean reads(%)	Unique mapped reads
CM_Ctrl_2	Control	50855158	48769162(95.90%)	35535282 (73.78%)
CM_Ctrl-4	Control	56869236	54928944(96.59%)	40190493 (74.08%)
CM_Ctrl-5	Control	54491124	52409282(96.18%)	38045926 (74.69%)
CM_DMSO_3	DMSO	56430288	54785456(97.09%)	40685485 (74.68%)
CM_DMSO-4	DMSO	55490814	53338842(96.12%)	39119056 (73.98%)
CM_DMSO-5	DMSO	54080102	52624040(97.31%)	38526906 (74.69%)
CM_F20_1	BPF20	55128272	54010170(97.97%)	40765622 (76.21%)
CM_F20_2	BPF20	60274124	58837952(97.62%)	44406805 (75.76%)
CM_F20_3	BPF20	59195982	57496746(97.13%)	40254608 (72.46%)
CM_F200_1	BPF200	45205294	42551668(94.13%)	31813757 (75.33%)
CM_F200_2	BPF200	41222182	39504122(95.83%)	26832061 (70.43%)
CM_F200_4	BPF200	51167862	49565284(96.87%)	36556608 (74.63%)
CM_F2000_1	BPF2000	57734596	55903650(96.83%)	41712154 (75.06%)
CM_F2000_2	BPF2000	45579444	44167158(96.90%)	32962901 (75.06%)
CM_F2000_3	BPF2000	53882940	52393016(97.23%)	38949007 (74.63%)
