# Supplementary material for: Transcriptome Analysis of the Developmental Effects of Bisphenol F Exposure in Chinese Medaka (Oryzias sinensis)
Source: Int J Mol Sci. 2023 Jun 30;24(13):10898. doi: 10.3390/ijms241310898 (PMC10341846; doi:10.3390/ijms241310898)
Supplement: Supplementary file 1 [file ijms-24-10898-s001.zip › Table S2 DEGs.xlsx]

## Sheet: DMSO-vs-Control
id	log2(fc)	PValue	FDR
ENSOSIG00000004596	2.44703	9.65104e-07	0.0236007

## Sheet: BPF20-vs-Control
id	log2(fc)	PValue	FDR
MSTRG.33660	11.3251	2.48903e-07	0.00343871
MSTRG.5355	5.54561	2.8078e-07	0.00343871
MSTRG.31082	-1.97632	5.01994e-07	0.00409861
ENSOSIG00000023089	-2.70158	7.47106e-07	0.0045749
MSTRG.19307	-3.09996	1.63009e-06	0.00717337
ENSOSIG00000013578	3.05305	1.75717e-06	0.00717337
ENSOSIG00000004321	2.56786	4.78736e-06	0.0150861
ENSOSIG00000018053	-1.44591	4.97561e-06	0.0150861
ENSOSIG00000022024	2.91633	5.54319e-06	0.0150861
MSTRG.30148	1.87153	7.51719e-06	0.0184126
ENSOSIG00000012286	3.11947	9.09157e-06	0.0202445
ENSOSIG00000011534	2.34755	1.1734e-05	0.023951
MSTRG.36279	-1.93139	1.33918e-05	0.0252323
MSTRG.28007	12.1025	1.82104e-05	0.0318604
ENSOSIG00000018129	-2.41932	2.11321e-05	0.0345072
MSTRG.5756	-2.65046	3.25097e-05	0.0497682

## Sheet: BPF200-vs-Control
id	log2(fc)	PValue	FDR
MSTRG.33660	11.3251	2.48903e-07	0.00343871
MSTRG.5355	5.54561	2.8078e-07	0.00343871
MSTRG.31082	-1.97632	5.01994e-07	0.00409861
ENSOSIG00000023089	-2.70158	7.47106e-07	0.0045749
MSTRG.19307	-3.09996	1.63009e-06	0.00717337
ENSOSIG00000013578	3.05305	1.75717e-06	0.00717337
ENSOSIG00000004321	2.56786	4.78736e-06	0.0150861
ENSOSIG00000018053	-1.44591	4.97561e-06	0.0150861
ENSOSIG00000022024	2.91633	5.54319e-06	0.0150861
MSTRG.30148	1.87153	7.51719e-06	0.0184126
ENSOSIG00000012286	3.11947	9.09157e-06	0.0202445
ENSOSIG00000011534	2.34755	1.1734e-05	0.023951
MSTRG.36279	-1.93139	1.33918e-05	0.0252323
MSTRG.28007	12.1025	1.82104e-05	0.0318604
ENSOSIG00000018129	-2.41932	2.11321e-05	0.0345072
MSTRG.5756	-2.65046	3.25097e-05	0.0497682

## Sheet: BPF2000-vs-Control
id	log2(fc)	PValue	FDR
ENSOSIG00000023994	14.1048	2.72329e-19	6.69086e-15
ENSOSIG00000009859	-2.0248	5.30183e-14	6.51303e-10
ENSOSIG00000018053	-2.09695	2.33114e-13	1.90913e-09
ENSOSIG00000009720	-2.29029	5.207e-12	3.18141e-08
ENSOSIG00000018292	-2.19085	6.47445e-12	3.18141e-08
ENSOSIG00000002415	-2.334	1.6447e-11	6.73477e-08
ENSOSIG00000005133	-1.66108	4.02523e-11	1.4128e-07
MSTRG.27186	-1.77044	5.21695e-11	1.60219e-07
ENSOSIG00000022057	-1.88296	9.70175e-11	2.64847e-07
ENSOSIG00000010618	-3.04793	2.40389e-10	5.90612e-07
MSTRG.36816	-3.13119	8.53263e-10	1.9058e-06
ENSOSIG00000007449	-1.40643	1.00902e-09	2.06588e-06
ENSOSIG00000006103	-1.77445	1.48151e-09	2.62019e-06
ENSOSIG00000009722	-2.63727	1.49305e-09	2.62019e-06
ENSOSIG00000000935	-3.26781	1.88085e-09	3.0807e-06
ENSOSIG00000004889	-1.77899	2.99925e-09	4.07638e-06
ENSOSIG00000014573	-1.81595	3.01762e-09	4.07638e-06
ENSOSIG00000004385	-1.97322	3.19332e-09	4.07638e-06
ENSOSIG00000021713	-1.44635	3.19757e-09	4.07638e-06
ENSOSIG00000018129	-2.97454	3.31831e-09	4.07638e-06
MSTRG.31082	-1.88859	3.78865e-09	4.43254e-06
ENSOSIG00000014855	-1.79245	4.86894e-09	5.36081e-06
MSTRG.17959	-2.12244	5.01846e-09	5.36081e-06
ENSOSIG00000011095	-2.52228	6.57749e-09	6.73343e-06
MSTRG.31855	2.73787	1.27433e-08	1.22246e-05
MSTRG.39732	-2.06412	1.29366e-08	1.22246e-05
ENSOSIG00000001069	-2.43241	1.36296e-08	1.24024e-05
ENSOSIG00000000786	-1.40983	1.55382e-08	1.27528e-05
ENSOSIG00000011370	-2.16426	1.56655e-08	1.27528e-05
ENSOSIG00000005063	-1.49803	1.58123e-08	1.27528e-05
ENSOSIG00000009699	-1.9634	1.65343e-08	1.27528e-05
ENSOSIG00000019484	-1.83581	1.661e-08	1.27528e-05
ENSOSIG00000004198	-1.67607	2.13929e-08	1.59274e-05
ENSOSIG00000015050	-1.65446	2.37936e-08	1.71937e-05
ENSOSIG00000008805	-1.70243	2.48159e-08	1.74201e-05
ENSOSIG00000006508	-1.5245	2.63907e-08	1.8011e-05
ENSOSIG00000004114	-1.38476	2.85453e-08	1.85123e-05
ENSOSIG00000003441	-1.81765	2.86324e-08	1.85123e-05
ENSOSIG00000006309	-1.77073	3.46748e-08	2.18442e-05
ENSOSIG00000008616	-1.17079	3.81915e-08	2.34582e-05
ENSOSIG00000019426	-3.89898	4.01353e-08	2.40509e-05
ENSOSIG00000002951	-1.4489	4.26179e-08	2.48733e-05
ENSOSIG00000019930	-1.16677	4.35326e-08	2.48733e-05
MSTRG.30148	2.25422	4.59184e-08	2.56402e-05
ENSOSIG00000018883	-1.45517	4.99335e-08	2.69944e-05
ENSOSIG00000009850	-2.0942	5.0541e-08	2.69944e-05
ENSOSIG00000017036	2.1823	5.54698e-08	2.89965e-05
ENSOSIG00000021738	-1.8657	6.41749e-08	3.28482e-05
ENSOSIG00000008809	-2.21725	6.93024e-08	3.47488e-05
ENSOSIG00000015054	-1.61756	8.11475e-08	3.98743e-05
ENSOSIG00000014659	-1.90689	8.4761e-08	4.08332e-05
MSTRG.26200	2.15146	8.65697e-08	4.09025e-05
ENSOSIG00000007949	-1.59712	9.21703e-08	4.2727e-05
ENSOSIG00000018562	-2.38486	1.0458e-07	4.58176e-05
ENSOSIG00000007596	-2.69785	1.05003e-07	4.58176e-05
ENSOSIG00000021778	-2.87545	1.07167e-07	4.58176e-05
ENSOSIG00000021556	-2.2255	1.07612e-07	4.58176e-05
ENSOSIG00000015495	1.96418	1.08162e-07	4.58176e-05
ENSOSIG00000010635	-1.84338	1.24058e-07	5.16606e-05
ENSOSIG00000023021	-1.61127	1.31928e-07	5.40222e-05
ENSOSIG00000022574	-1.26935	1.38672e-07	5.58529e-05
ENSOSIG00000023128	-1.48833	1.50313e-07	5.90614e-05
ENSOSIG00000010088	-1.40246	1.51446e-07	5.90614e-05
ENSOSIG00000016352	2.00454	1.62323e-07	6.1532e-05
ENSOSIG00000002169	-1.01226	1.64507e-07	6.1532e-05
ENSOSIG00000008246	2.0993	1.65294e-07	6.1532e-05
MSTRG.25243	-1.1694	1.68148e-07	6.16603e-05
MSTRG.32420	-1.50715	1.86902e-07	6.75292e-05
MSTRG.10194	3.0785	2.46219e-07	8.76719e-05
ENSOSIG00000011151	-1.23668	2.50416e-07	8.78924e-05
ENSOSIG00000015130	-1.99865	2.57486e-07	8.91011e-05
ENSOSIG00000006185	-1.02225	2.70943e-07	9.20952e-05
ENSOSIG00000004792	-1.13071	2.73635e-07	9.20952e-05
ENSOSIG00000007618	2.17983	2.80982e-07	9.329e-05
ENSOSIG00000013588	-2.90924	3.1018e-07	0.000101611
ENSOSIG00000004720	-1.58787	3.19178e-07	0.000103183
ENSOSIG00000006318	-1.39296	3.25569e-07	0.000103193
ENSOSIG00000010557	-1.19147	3.27611e-07	0.000103193
ENSOSIG00000012953	-1.99944	3.64056e-07	0.000113222
ENSOSIG00000023413	2.25467	3.90833e-07	0.00012003
ENSOSIG00000008260	-2.43439	4.0214e-07	0.000121978
ENSOSIG00000012509	-1.82834	4.12417e-07	0.000123569
ENSOSIG00000006154	-1.08885	4.33288e-07	0.000128259
MSTRG.741	-1.30552	4.63285e-07	0.000135505
ENSOSIG00000022313	2.18502	4.85632e-07	0.00014037
ENSOSIG00000009950	1.9998	5.49813e-07	0.00015326
ENSOSIG00000014319	-1.32081	5.50815e-07	0.00015326
ENSOSIG00000007565	1.84657	5.55176e-07	0.00015326
MSTRG.36583	2.64255	5.61567e-07	0.000153302
ENSOSIG00000008858	-1.81175	5.81293e-07	0.000156943
ENSOSIG00000014568	-1.95478	6.14749e-07	0.000163912
MSTRG.18161	-1.28621	6.23047e-07	0.000163912
ENSOSIG00000013041	2.06686	6.27121e-07	0.000163912
ENSOSIG00000010718	-2.06121	6.47128e-07	0.000167361
ENSOSIG00000011529	-1.17741	6.73492e-07	0.000171799
ENSOSIG00000022942	-1.47547	6.83271e-07	0.000171799
MSTRG.34405	2.51081	6.85268e-07	0.000171799
ENSOSIG00000009705	-1.81326	7.27107e-07	0.000180447
ENSOSIG00000018941	5.15291	7.4712e-07	0.00018314
ENSOSIG00000009133	2.23819	7.52867e-07	0.00018314
ENSOSIG00000006253	-1.29294	7.68728e-07	0.000184428
ENSOSIG00000014506	2.23732	7.8046e-07	0.000184428
ENSOSIG00000009825	-1.87817	7.8068e-07	0.000184428
ENSOSIG00000007142	-1.35531	7.89605e-07	0.00018476
ENSOSIG00000016859	2.02167	8.03967e-07	0.000186346
MSTRG.34080	1.95275	8.34868e-07	0.0001917
ENSOSIG00000006352	-1.28766	8.47211e-07	0.000191704
MSTRG.31308	-2.02704	8.50493e-07	0.000191704
ENSOSIG00000008098	-2.17543	9.29043e-07	0.000207506
MSTRG.6391	-1.28123	9.67378e-07	0.000214122
ENSOSIG00000016460	-1.7468	1.02225e-06	0.000223449
MSTRG.5026	-2.71357	1.03058e-06	0.000223449
MSTRG.5813	-1.14355	1.0368e-06	0.000223449
ENSOSIG00000005175	-1.18738	1.06077e-06	0.000226627
ENSOSIG00000006019	-1.31966	1.07505e-06	0.000227698
ENSOSIG00000002197	-1.28358	1.10869e-06	0.000232816
ENSOSIG00000014165	-1.78915	1.15603e-06	0.000240699
ENSOSIG00000004013	2.20124	1.17656e-06	0.000242915
ENSOSIG00000006946	2.0302	1.2198e-06	0.000249744
MSTRG.2420	1.9827	1.23368e-06	0.000250497
ENSOSIG00000009702	-1.81999	1.35333e-06	0.000272214
ENSOSIG00000016403	2.04441	1.36279e-06	0.000272214
ENSOSIG00000007754	-1.28225	1.37836e-06	0.000273104
ENSOSIG00000000211	2.4431	1.40441e-06	0.000275943
MSTRG.26197	2.02569	1.41515e-06	0.000275943
ENSOSIG00000023158	2.06765	1.47377e-06	0.00028511
MSTRG.23225	-2.12847	1.50291e-06	0.00028842
ENSOSIG00000021897	-2.21204	1.51435e-06	0.00028842
ENSOSIG00000014545	-1.18315	1.5421e-06	0.000291115
ENSOSIG00000000871	-2.4446	1.5522e-06	0.000291115
ENSOSIG00000012300	-1.67296	1.7466e-06	0.000325092
ENSOSIG00000004331	2.68127	1.78066e-06	0.000328941
ENSOSIG00000003732	-2.20048	1.84432e-06	0.000338157
ENSOSIG00000020797	-1.31663	1.86438e-06	0.000339304
MSTRG.4747	2.46038	1.88996e-06	0.00034143
ENSOSIG00000020093	-2.04303	1.94464e-06	0.000348743
ENSOSIG00000019076	2.91703	2.0165e-06	0.000358321
ENSOSIG00000008589	-1.48933	2.02721e-06	0.000358321
ENSOSIG00000022024	2.70192	2.09184e-06	0.000367103
MSTRG.14363	2.22326	2.41015e-06	0.000419965
ENSOSIG00000015788	-2.03337	2.44387e-06	0.000422842
ENSOSIG00000011836	-1.74764	2.50973e-06	0.000431199
ENSOSIG00000013482	-2.27027	2.57189e-06	0.000436817
MSTRG.9972	-1.14169	2.57798e-06	0.000436817
ENSOSIG00000000087	-1.63483	2.64056e-06	0.000439484
MSTRG.17537	-2.27425	2.64738e-06	0.000439484
ENSOSIG00000022650	-1.63216	2.6785e-06	0.000441665
ENSOSIG00000007616	-1.07337	2.82442e-06	0.000459557
ENSOSIG00000016154	-2.23293	3.02348e-06	0.000488709
ENSOSIG00000007769	1.78377	3.07056e-06	0.000493076
ENSOSIG00000007127	1.95174	3.21834e-06	0.00051345
MSTRG.21251	-2.2801	3.52585e-06	0.000558881
ENSOSIG00000010962	1.80199	3.59224e-06	0.000565755
ENSOSIG00000014541	-1.28404	3.68928e-06	0.000577337
ENSOSIG00000022906	-2.14855	3.77596e-06	0.000587162
MSTRG.40177	2.93785	3.85007e-06	0.000593158
ENSOSIG00000023167	-2.15375	3.87097e-06	0.000593158
ENSOSIG00000012486	-1.66482	3.88695e-06	0.000593158
ENSOSIG00000007149	-2.0861	3.93753e-06	0.000594862
ENSOSIG00000008558	-1.44675	3.94654e-06	0.000594862
ENSOSIG00000021971	2.00117	4.16424e-06	0.000623849
MSTRG.29553	-2.16866	4.25378e-06	0.000633401
MSTRG.36279	-1.8323	4.32504e-06	0.000640132
ENSOSIG00000016538	-1.54657	4.41156e-06	0.000646833
ENSOSIG00000016668	-1.1453	4.44946e-06	0.000646833
ENSOSIG00000014894	-1.56666	4.45932e-06	0.000646833
MSTRG.33995	-1.49718	4.47562e-06	0.000646833
MSTRG.36609	3.03387	4.53426e-06	0.000647687
ENSOSIG00000021553	-1.22662	4.69948e-06	0.000663416
ENSOSIG00000006099	-1.8143	4.74921e-06	0.000663416
ENSOSIG00000022677	2.05905	4.75875e-06	0.000663416
ENSOSIG00000003329	-1.63109	4.77938e-06	0.000663416
ENSOSIG00000014452	-1.76565	4.90104e-06	0.000676482
ENSOSIG00000011233	1.80131	5.22362e-06	0.000712995
ENSOSIG00000012266	-1.42542	5.42017e-06	0.000731962
ENSOSIG00000018565	-2.12834	5.42216e-06	0.000731962
ENSOSIG00000021354	-1.22639	5.74278e-06	0.000763359
ENSOSIG00000019981	-1.79281	5.74535e-06	0.000763359
ENSOSIG00000011155	-1.7023	5.75289e-06	0.000763359
ENSOSIG00000009646	-1.81887	5.77902e-06	0.000763359
ENSOSIG00000016962	-2.21616	5.8462e-06	0.000768103
ENSOSIG00000015549	-1.71352	5.88141e-06	0.000768105
ENSOSIG00000005456	-1.35085	5.90874e-06	0.000768105
ENSOSIG00000014578	-1.82362	5.95724e-06	0.000770334
ENSOSIG00000006684	-1.0697	6.10407e-06	0.000785188
ENSOSIG00000005512	1.91805	6.2519e-06	0.000800016
ENSOSIG00000005940	-1.22189	6.34762e-06	0.000805451
ENSOSIG00000004069	1.93722	6.35994e-06	0.000805451
ENSOSIG00000011669	2.02552	6.43992e-06	0.000811397
MSTRG.2279	-2.56799	6.52244e-06	0.000817602
ENSOSIG00000012188	-1.50408	6.88686e-06	0.0008589
ENSOSIG00000006133	-1.20619	7.28003e-06	0.000903348
ENSOSIG00000010890	-1.53986	7.34581e-06	0.000906931
ENSOSIG00000004816	-1.1771	7.60633e-06	0.000929751
ENSOSIG00000015128	-1.00358	7.71834e-06	0.000938771
ENSOSIG00000013871	-1.50681	7.8386e-06	0.000948703
MSTRG.40128	-1.04363	7.91902e-06	0.000949523
ENSOSIG00000019499	1.81484	7.92267e-06	0.000949523
ENSOSIG00000018371	1.77126	8.20271e-06	0.000973586
ENSOSIG00000016699	2.88692	8.65749e-06	0.00102262
MSTRG.21267	1.84159	8.7268e-06	0.00102588
MSTRG.10608	2.47922	8.80946e-06	0.00103066
ENSOSIG00000000819	-1.51208	9.07943e-06	0.00105455
ENSOSIG00000010138	-1.4289	9.09948e-06	0.00105455
ENSOSIG00000023214	1.96087	9.18124e-06	0.00105903
ENSOSIG00000022777	-1.54398	9.23631e-06	0.0010597
ENSOSIG00000016156	1.92627	9.31405e-06	0.0010597
ENSOSIG00000021834	-2.02355	9.36121e-06	0.00105989
ENSOSIG00000004335	-2.16963	9.42517e-06	0.00106223
MSTRG.8584	-1.66819	9.73919e-06	0.00109261
ENSOSIG00000022824	1.69431	1.00476e-05	0.00112209
ENSOSIG00000008419	-1.21279	1.0124e-05	0.00112551
ENSOSIG00000023969	-1.78575	1.05862e-05	0.00116634
ENSOSIG00000010818	-1.52812	1.07498e-05	0.00117455
ENSOSIG00000022256	1.90366	1.07564e-05	0.00117455
ENSOSIG00000000966	1.89626	1.09115e-05	0.00118621
ENSOSIG00000023257	1.79536	1.14893e-05	0.00124352
ENSOSIG00000018652	-1.24012	1.16727e-05	0.00125606
ENSOSIG00000013680	-1.35466	1.17074e-05	0.00125606
ENSOSIG00000014469	2.00447	1.18427e-05	0.00126134
ENSOSIG00000002140	-1.2456	1.18592e-05	0.00126134
ENSOSIG00000011674	-1.5853	1.22119e-05	0.00128564
ENSOSIG00000013600	-1.71573	1.22326e-05	0.00128564
MSTRG.5386	-3.48002	1.22447e-05	0.00128564
ENSOSIG00000022331	2.53188	1.2684e-05	0.00132048
ENSOSIG00000006282	-1.21332	1.28228e-05	0.00132372
MSTRG.2517	2.22305	1.29731e-05	0.00133363
ENSOSIG00000015627	-1.04056	1.3076e-05	0.00133798
ENSOSIG00000006218	-1.43622	1.31244e-05	0.00133798
ENSOSIG00000000960	-1.48778	1.34505e-05	0.00136556
MSTRG.28007	12.3851	1.38726e-05	0.00140262
ENSOSIG00000017717	-1.35357	1.41646e-05	0.00142627
ENSOSIG00000023334	-1.06651	1.44634e-05	0.0014462
ENSOSIG00000009724	-3.37199	1.44803e-05	0.0014462
ENSOSIG00000004014	2.20503	1.4891e-05	0.0014812
ENSOSIG00000018723	-1.62574	1.53415e-05	0.00151986
ENSOSIG00000009745	-1.36918	1.54778e-05	0.00152405
MSTRG.30482	-1.15254	1.55078e-05	0.00152405
ENSOSIG00000016978	1.89148	1.56557e-05	0.00152736
ENSOSIG00000013479	-1.24806	1.56659e-05	0.00152736
MSTRG.14452	-1.25931	1.5973e-05	0.00154894
ENSOSIG00000010848	-1.00012	1.60399e-05	0.00154894
ENSOSIG00000007349	2.0878	1.60764e-05	0.00154894
ENSOSIG00000008764	1.95615	1.63293e-05	0.00156717
MSTRG.10613	2.21231	1.66163e-05	0.0015885
ENSOSIG00000007847	-1.49508	1.75354e-05	0.00165319
ENSOSIG00000016798	1.987	1.75574e-05	0.00165319
ENSOSIG00000005799	2.2557	1.77455e-05	0.00166408
ENSOSIG00000007963	-1.22539	1.79596e-05	0.00167136
ENSOSIG00000013757	-1.0856	1.8018e-05	0.00167136
ENSOSIG00000002550	2.09996	1.80294e-05	0.00167136
MSTRG.12218	2.33584	1.80953e-05	0.00167136
ENSOSIG00000021455	2.04233	1.82686e-05	0.00167565
ENSOSIG00000014018	2.59922	1.83801e-05	0.00167565
ENSOSIG00000023755	1.8245	1.84145e-05	0.00167565
ENSOSIG00000015858	-1.35796	1.85244e-05	0.00167943
MSTRG.8995	-1.71442	1.90038e-05	0.00171656
ENSOSIG00000006533	1.68858	1.91934e-05	0.0017257
MSTRG.30319	-1.95165	1.96576e-05	0.00175624
ENSOSIG00000014681	-1.65383	2.01008e-05	0.00178933
ENSOSIG00000008632	-1.46639	2.02924e-05	0.00179813
ENSOSIG00000010325	2.02385	2.0346e-05	0.00179813
ENSOSIG00000018387	2.00831	2.10774e-05	0.00184947
MSTRG.25302	-1.05612	2.15611e-05	0.00187849
ENSOSIG00000009804	2.93328	2.25065e-05	0.00194705
ENSOSIG00000020820	-1.91548	2.26905e-05	0.00195608
ENSOSIG00000020087	1.85394	2.28203e-05	0.00196039
ENSOSIG00000002741	-1.29267	2.31996e-05	0.00198603
ENSOSIG00000011368	-1.20227	2.35981e-05	0.00201313
ENSOSIG00000023568	1.97157	2.42568e-05	0.00206217
ENSOSIG00000000591	-1.46762	2.47951e-05	0.00209279
ENSOSIG00000015180	1.8158	2.48726e-05	0.00209279
ENSOSIG00000021364	1.73808	2.55744e-05	0.0021445
ENSOSIG00000011126	-1.32723	2.63326e-05	0.00219629
ENSOSIG00000013132	1.97928	2.66615e-05	0.002213
ENSOSIG00000006752	2.19261	2.73554e-05	0.00224781
ENSOSIG00000002917	-4.64832	2.75355e-05	0.00225506
ENSOSIG00000005889	1.93973	2.77833e-05	0.0022678
MSTRG.24965	-1.81993	2.79919e-05	0.00227111
ENSOSIG00000016388	-1.07595	2.80087e-05	0.00227111
ENSOSIG00000005769	2.11107	2.87511e-05	0.00232364
ENSOSIG00000005774	-1.35307	2.90099e-05	0.00233687
ENSOSIG00000007191	1.94699	2.9577e-05	0.00237477
MSTRG.12369	1.91897	2.98547e-05	0.0023815
ENSOSIG00000015634	-1.02697	3.00446e-05	0.00238168
ENSOSIG00000008749	-1.08209	3.01096e-05	0.00238168
ENSOSIG00000012232	2.1336	3.02447e-05	0.00238168
ENSOSIG00000007441	-1.12289	3.03757e-05	0.00238434
ENSOSIG00000009818	-2.2005	3.1473e-05	0.00246261
MSTRG.37804	2.21143	3.17645e-05	0.00247753
ENSOSIG00000018946	-1.15385	3.23178e-05	0.00250998
ENSOSIG00000016510	1.79611	3.23849e-05	0.00250998
ENSOSIG00000008541	-1.78679	3.27719e-05	0.00253199
MSTRG.8316	1.79707	3.35092e-05	0.00257277
ENSOSIG00000005347	-1.92558	3.40701e-05	0.00258575
ENSOSIG00000022847	-1.48891	3.40992e-05	0.00258575
ENSOSIG00000014841	1.64988	3.43421e-05	0.00259616
ENSOSIG00000010269	1.65715	3.46327e-05	0.00260467
ENSOSIG00000010504	2.26784	3.47852e-05	0.00260467
MSTRG.9233	-2.0353	3.48748e-05	0.00260467
ENSOSIG00000010375	-2.51042	3.48788e-05	0.00260467
ENSOSIG00000012873	-1.48565	3.63e-05	0.00268802
ENSOSIG00000013368	-1.16059	3.63302e-05	0.00268802
ENSOSIG00000002658	-1.0483	3.64625e-05	0.00268802
ENSOSIG00000003021	3.92959	3.66562e-05	0.00268802
ENSOSIG00000011640	-1.19787	3.69327e-05	0.00269258
ENSOSIG00000015831	-1.6146	3.71248e-05	0.00269857
ENSOSIG00000006661	-1.58624	3.80341e-05	0.00275652
ENSOSIG00000023648	1.9434	3.86875e-05	0.00279563
ENSOSIG00000023112	1.87327	3.89964e-05	0.00280968
MSTRG.31802	2.58133	3.93435e-05	0.00282641
ENSOSIG00000018351	-1.18154	4.00666e-05	0.00286996
ENSOSIG00000000504	1.71977	4.08791e-05	0.00291965
ENSOSIG00000003175	-1.79678	4.12372e-05	0.00292779
ENSOSIG00000008525	-1.79394	4.13507e-05	0.00292779
ENSOSIG00000018414	-1.22389	4.19156e-05	0.00295812
ENSOSIG00000012207	1.7738	4.20198e-05	0.00295812
ENSOSIG00000013792	-1.68813	4.21679e-05	0.00296006
ENSOSIG00000007316	-1.17046	4.24562e-05	0.00297182
ENSOSIG00000018310	2.06366	4.4022e-05	0.00307266
ENSOSIG00000007161	1.74992	4.41883e-05	0.00307553
ENSOSIG00000010602	-1.44296	4.47755e-05	0.0031076
ENSOSIG00000010888	-1.75222	4.53641e-05	0.00313958
ENSOSIG00000019428	-1.12848	4.62896e-05	0.00319463
ENSOSIG00000018077	1.84611	4.6597e-05	0.00320684
ENSOSIG00000000261	1.74634	4.69677e-05	0.00322082
ENSOSIG00000021780	-1.40237	4.72574e-05	0.00322519
ENSOSIG00000011216	1.89911	4.75553e-05	0.00323652
ENSOSIG00000022107	-1.66784	4.7697e-05	0.0032372
ENSOSIG00000007857	1.79551	4.80769e-05	0.003254
ENSOSIG00000009502	1.88459	4.83581e-05	0.00326404
ENSOSIG00000019421	1.66483	4.96308e-05	0.00334077
ENSOSIG00000005001	1.79754	4.99256e-05	0.00335142
ENSOSIG00000004144	-1.58046	5.0593e-05	0.00338698
ENSOSIG00000013246	-2.15641	5.13712e-05	0.00342043
ENSOSIG00000019404	2.0345	5.23735e-05	0.00347775
MSTRG.35236	2.00667	5.34348e-05	0.00352914
ENSOSIG00000018555	2.01437	5.36438e-05	0.00353344
ENSOSIG00000002829	-1.32617	5.38429e-05	0.00353708
ENSOSIG00000021437	1.71046	5.41441e-05	0.0035387
MSTRG.27981	-1.91662	5.41557e-05	0.0035387
ENSOSIG00000012151	-1.86012	5.50908e-05	0.00358076
ENSOSIG00000009954	-2.08105	5.52465e-05	0.0035814
ENSOSIG00000023213	-1.33157	5.56954e-05	0.00359518
ENSOSIG00000006536	-2.05648	5.57516e-05	0.00359518
ENSOSIG00000006874	-1.02217	5.67159e-05	0.0036383
ENSOSIG00000016739	-1.49169	5.67166e-05	0.0036383
MSTRG.24653	-1.84838	5.77439e-05	0.00368496
MSTRG.14301	10.1874	5.79513e-05	0.00368862
ENSOSIG00000011658	-5.35377	5.88203e-05	0.00372753
ENSOSIG00000016795	-1.30029	5.88661e-05	0.00372753
MSTRG.22474	1.58872	5.98378e-05	0.00376963
ENSOSIG00000004795	-1.75648	6.12455e-05	0.00384237
ENSOSIG00000006944	1.86903	6.13053e-05	0.00384237
ENSOSIG00000006670	-1.69462	6.16348e-05	0.00384523
ENSOSIG00000001322	2.33721	6.18205e-05	0.00384523
ENSOSIG00000021012	-2.23582	6.26057e-05	0.00387573
ENSOSIG00000004321	2.43242	6.26263e-05	0.00387573
ENSOSIG00000016689	-1.8543	6.30611e-05	0.00389284
ENSOSIG00000023897	1.68931	6.34946e-05	0.00390977
ENSOSIG00000021230	-2.41446	6.51672e-05	0.00400273
ENSOSIG00000020013	1.92344	6.56597e-05	0.00401292
ENSOSIG00000004868	-1.6218	6.74461e-05	0.00411187
ENSOSIG00000012828	1.72825	6.77424e-05	0.00411971
ENSOSIG00000011282	-1.60438	6.79589e-05	0.00412267
ENSOSIG00000017326	-1.62773	6.97553e-05	0.00421085
ENSOSIG00000013115	-1.5758	7.27503e-05	0.00437565
MSTRG.38827	-1.41287	7.30859e-05	0.00437565
ENSOSIG00000013594	-1.42908	7.31568e-05	0.00437565
ENSOSIG00000022744	-1.12998	7.31977e-05	0.00437565
ENSOSIG00000000566	-1.31586	7.5204e-05	0.00446301
ENSOSIG00000008348	2.067	7.54546e-05	0.00446709
ENSOSIG00000002483	-1.09785	7.7442e-05	0.00456276
MSTRG.27662	-1.05998	7.94599e-05	0.00466984
ENSOSIG00000007226	2.10182	7.96395e-05	0.00466984
ENSOSIG00000012712	-1.07383	8.07164e-05	0.00472172
ENSOSIG00000006517	-1.06411	8.1665e-05	0.00475689
ENSOSIG00000015238	-1.36862	8.18985e-05	0.00475689
ENSOSIG00000018373	1.84854	8.27665e-05	0.00478468
ENSOSIG00000019738	-1.41043	8.38044e-05	0.00480727
ENSOSIG00000009821	2.27934	8.38293e-05	0.00480727
ENSOSIG00000022077	1.79901	8.39653e-05	0.00480727
ENSOSIG00000002464	-1.09561	8.40732e-05	0.00480727
ENSOSIG00000007447	-1.066	8.41355e-05	0.00480727
ENSOSIG00000010578	-1.16733	8.57909e-05	0.00488385
ENSOSIG00000013784	-1.34066	8.60722e-05	0.00488385
MSTRG.28205	2.55934	8.8104e-05	0.00497847
MSTRG.34404	2.81341	8.82368e-05	0.00497847
ENSOSIG00000010340	1.84835	8.83477e-05	0.00497847
ENSOSIG00000003924	1.66423	8.86585e-05	0.00498455
MSTRG.10633	1.62501	8.9201e-05	0.00500361
ENSOSIG00000017890	1.83046	8.98508e-05	0.00502857
ENSOSIG00000013381	-1.11046	9.15789e-05	0.00510195
ENSOSIG00000008469	-1.05081	9.17849e-05	0.00510195
ENSOSIG00000011063	-1.58081	9.21302e-05	0.00510959
ENSOSIG00000019850	-1.12749	9.29893e-05	0.00514562
ENSOSIG00000003902	-1.42813	9.41391e-05	0.00519754
ENSOSIG00000017283	-1.09657	9.57699e-05	0.00526392
ENSOSIG00000017598	-2.17269	9.66099e-05	0.00529824
ENSOSIG00000003772	1.755	9.88031e-05	0.0053943
ENSOSIG00000016629	1.67956	9.89381e-05	0.0053943
MSTRG.19551	2.16126	9.90203e-05	0.0053943
MSTRG.42878	1.66128	9.94311e-05	0.0054047
ENSOSIG00000018704	-1.23129	0.000100225	0.00543584
ENSOSIG00000020358	1.78737	0.000100796	0.00545475
ENSOSIG00000015650	1.60258	0.0001024	0.00551665
ENSOSIG00000015781	1.84542	0.000102613	0.00551665
MSTRG.7475	-1.62918	0.000102896	0.00551975
MSTRG.36087	-1.78699	0.000103425	0.00553603
ENSOSIG00000021070	1.74446	0.000106245	0.00563788
ENSOSIG00000005672	1.95309	0.000107589	0.00568782
ENSOSIG00000015064	-1.45951	0.000107649	0.00568782
ENSOSIG00000000049	1.96083	0.000110317	0.00580381
ENSOSIG00000015748	1.76783	0.000112271	0.005894
ENSOSIG00000019431	-1.67977	0.000113791	0.00595325
MSTRG.32399	1.50272	0.000113884	0.00595325
ENSOSIG00000002596	-1.56993	0.000116801	0.00606697
ENSOSIG00000009380	2.30044	0.000119296	0.0061672
ENSOSIG00000023917	1.8149	0.000120592	0.00619002
ENSOSIG00000019684	2.04794	0.000120658	0.00619002
ENSOSIG00000022109	1.72198	0.000120687	0.00619002
MSTRG.33972	-1.39235	0.000120933	0.00619002
ENSOSIG00000008047	-1.42532	0.000122295	0.00621331
ENSOSIG00000009971	2.31117	0.000122331	0.00621331
ENSOSIG00000020337	-1.56434	0.000122426	0.00621331
ENSOSIG00000019019	1.55551	0.000122653	0.00621331
MSTRG.15135	-1.12301	0.000124231	0.00626743
ENSOSIG00000004131	-1.29102	0.000126742	0.00635494
ENSOSIG00000007844	-12.2938	0.000128296	0.00639279
ENSOSIG00000017986	1.80415	0.00013028	0.00645333
ENSOSIG00000019486	-1.02323	0.000131079	0.00647526
ENSOSIG00000022620	1.76622	0.00013125	0.00647526
ENSOSIG00000023979	1.93013	0.000132759	0.00653661
ENSOSIG00000005168	1.69843	0.000133287	0.00654947
ENSOSIG00000021126	-1.2844	0.000134922	0.00659028
ENSOSIG00000014460	-1.33732	0.000135592	0.00660983
ENSOSIG00000012598	1.59861	0.000136266	0.00661058
ENSOSIG00000014588	1.79613	0.000136316	0.00661058
ENSOSIG00000007287	1.63799	0.000137173	0.00662124
ENSOSIG00000016618	-1.52378	0.000141022	0.00678035
ENSOSIG00000007638	1.9731	0.00014205	0.00680769
ENSOSIG00000020032	-1.01277	0.000142144	0.00680769
ENSOSIG00000006465	-1.06803	0.000143084	0.00681766
ENSOSIG00000018742	-1.36746	0.000143362	0.00681766
ENSOSIG00000020343	-1.63515	0.000143463	0.00681766
ENSOSIG00000002730	-1.49437	0.000144149	0.00683707
ENSOSIG00000019515	-1.28833	0.000144585	0.00684454
ENSOSIG00000005716	-1.10477	0.000146027	0.00689947
ENSOSIG00000004807	1.75885	0.000146747	0.00692019
MSTRG.6287	2.10487	0.00014785	0.00694556
ENSOSIG00000011783	1.61459	0.000149343	0.00700205
ENSOSIG00000022336	-2.39559	0.000149754	0.00700205
ENSOSIG00000011379	-1.15783	0.000152074	0.00703275
MSTRG.31570	2.03122	0.00015256	0.00703275
ENSOSIG00000005515	-1.26927	0.000152569	0.00703275
ENSOSIG00000009830	1.60075	0.000153975	0.00707575
ENSOSIG00000017628	-1.32636	0.000154077	0.00707575
ENSOSIG00000020167	1.80482	0.000155102	0.00710914
ENSOSIG00000006379	1.52461	0.000155383	0.00710914
ENSOSIG00000005522	1.64041	0.000157002	0.00716985
ENSOSIG00000016312	-1.29943	0.000158309	0.00720903
ENSOSIG00000022006	1.82948	0.000158447	0.00720903
ENSOSIG00000007391	1.63409	0.000159503	0.00724369
MSTRG.11053	-2.22215	0.000160343	0.00726837
ENSOSIG00000015575	-1.72525	0.000162719	0.0073625
MSTRG.24105	-10.1176	0.000163918	0.00738956
ENSOSIG00000008933	1.56792	0.000166666	0.00747229
ENSOSIG00000000219	-1.26427	0.000168712	0.0075365
ENSOSIG00000006753	2.13501	0.000169964	0.00757867
ENSOSIG00000016652	1.64999	0.000171529	0.00763459
MSTRG.31655	2.07122	0.000175357	0.00777681
ENSOSIG00000005174	1.82444	0.000176699	0.0078222
ENSOSIG00000011443	-1.5608	0.000178996	0.00788128
ENSOSIG00000020370	1.6103	0.000180253	0.00791035
MSTRG.19201	-2.08819	0.000181342	0.00794186
ENSOSIG00000003492	2.11656	0.00018194	0.00795389
MSTRG.42653	-1.34992	0.000183189	0.00799426
ENSOSIG00000007288	-1.15757	0.000185346	0.00807404
MSTRG.10943	-1.14757	0.000187047	0.00813373
ENSOSIG00000003206	1.63779	0.000188975	0.00819221
ENSOSIG00000008769	1.65548	0.000189059	0.00819221
ENSOSIG00000009262	-1.1826	0.000190424	0.00823684
ENSOSIG00000008750	-2.48489	0.000190799	0.00823857
ENSOSIG00000004004	-1.7934	0.000194732	0.00836427
ENSOSIG00000010511	-1.01981	0.00019565	0.00838903
ENSOSIG00000007062	1.84338	0.00019811	0.00842103
ENSOSIG00000016354	1.59372	0.000199549	0.00846497
ENSOSIG00000011692	-1.46975	0.000199832	0.00846497
ENSOSIG00000023062	1.8198	0.000200982	0.0084844
ENSOSIG00000023089	-1.67525	0.000201976	0.00851174
ENSOSIG00000009981	1.73789	0.000202379	0.00851412
ENSOSIG00000019725	-1.06473	0.000204238	0.00856301
ENSOSIG00000003060	-1.00359	0.000207409	0.0086224
ENSOSIG00000020428	-2.22487	0.000208706	0.00866164
ENSOSIG00000008566	1.70687	0.000209295	0.00867145
ENSOSIG00000020958	-1.89048	0.00021004	0.00868765
ENSOSIG00000001789	1.66227	0.000212635	0.00876548
ENSOSIG00000001105	-1.02955	0.000213221	0.0087655
ENSOSIG00000019470	1.60173	0.000213349	0.0087655
ENSOSIG00000017991	1.87287	0.000216993	0.00888622
ENSOSIG00000005499	-1.12238	0.000217406	0.0088876
ENSOSIG00000020367	-1.24178	0.00021898	0.00892339
ENSOSIG00000022106	1.74941	0.000219976	0.00893321
ENSOSIG00000000605	-1.93977	0.000223591	0.0090501
MSTRG.9805	-1.22173	0.000224771	0.0090829
ENSOSIG00000023590	-1.22221	0.000226394	0.00911608
ENSOSIG00000018150	1.58667	0.000226678	0.00911608
ENSOSIG00000009442	-4.89477	0.000226705	0.00911608
ENSOSIG00000014908	2.48481	0.000228273	0.00914933
ENSOSIG00000006212	1.66189	0.000228277	0.00914933
ENSOSIG00000004541	2.20939	0.000232083	0.00927162
ENSOSIG00000020175	-1.01623	0.000233182	0.00930039
ENSOSIG00000007827	1.80365	0.000233872	0.00931279
ENSOSIG00000020726	-1.54962	0.000235319	0.00934016
ENSOSIG00000016766	-1.13061	0.000237148	0.00939756
ENSOSIG00000011775	-1.20233	0.000237965	0.00941477
ENSOSIG00000016267	1.99793	0.000239289	0.0094519
ENSOSIG00000022882	-1.72016	0.000240045	0.00946655
ENSOSIG00000014937	-1.2441	0.000243549	0.00957403
MSTRG.19914	1.5721	0.000246536	0.0096605
ENSOSIG00000009761	2.71166	0.000247607	0.00968626
ENSOSIG00000012495	-1.18589	0.000247981	0.00968626
ENSOSIG00000004989	1.65883	0.000250069	0.00974504
ENSOSIG00000011534	2.24317	0.00025028	0.00974504
ENSOSIG00000014953	1.76303	0.000251749	0.00977847
ENSOSIG00000005147	1.63817	0.000257993	0.00995217
ENSOSIG00000011790	1.88423	0.000258435	0.00995217
ENSOSIG00000013964	1.60577	0.000259944	0.00999461
ENSOSIG00000018426	-1.04465	0.000260717	0.0100087
ENSOSIG00000010768	-1.2601	0.000262705	0.0100693
ENSOSIG00000021714	-1.04869	0.000266079	0.0101739
ENSOSIG00000019416	1.67152	0.000267639	0.0102106
ENSOSIG00000010544	-1.87435	0.000269299	0.010229
ENSOSIG00000017146	1.9799	0.000269369	0.010229
ENSOSIG00000008429	1.6492	0.000270241	0.0102462
ENSOSIG00000008647	-1.65404	0.000272717	0.0103083
ENSOSIG00000006836	1.75662	0.000278592	0.010466
ENSOSIG00000023780	1.5909	0.000280078	0.0104757
ENSOSIG00000011589	-3.00441	0.000280653	0.0104757
ENSOSIG00000021550	-1.06598	0.000280772	0.0104757
ENSOSIG00000013406	1.72137	0.00028085	0.0104757
ENSOSIG00000011766	-1.09075	0.000280983	0.0104757
ENSOSIG00000017819	1.66867	0.000284811	0.0105863
ENSOSIG00000007195	1.61007	0.000290398	0.0107614
ENSOSIG00000003140	1.56782	0.000290875	0.0107628
ENSOSIG00000011592	1.72646	0.000293519	0.0108443
ENSOSIG00000003589	1.60739	0.000302768	0.0110912
ENSOSIG00000007725	-1.56188	0.000303362	0.0110912
ENSOSIG00000012024	-1.66086	0.000303691	0.0110912
ENSOSIG00000003407	-1.02923	0.000304478	0.0110973
ENSOSIG00000020526	1.66697	0.000304885	0.0110973
ENSOSIG00000003092	-1.4161	0.000306075	0.0111078
ENSOSIG00000017310	1.88196	0.000308984	0.0111803
ENSOSIG00000005609	2.24976	0.000311226	0.0112449
ENSOSIG00000005593	1.67252	0.00031241	0.0112711
ENSOSIG00000001453	-1.05471	0.000313612	0.0112879
ENSOSIG00000014301	1.54333	0.000313796	0.0112879
ENSOSIG00000017752	-1.12402	0.000318505	0.0114239
ENSOSIG00000021103	1.64344	0.000320027	0.0114617
ENSOSIG00000018621	1.67135	0.000323285	0.0115615
ENSOSIG00000017233	1.97599	0.000324058	0.0115724
ENSOSIG00000010152	-1.82912	0.000328064	0.0116896
ENSOSIG00000015446	2.5908	0.000329381	0.011701
MSTRG.31027	2.76841	0.000331327	0.0117251
ENSOSIG00000004178	1.82269	0.000331548	0.0117251
MSTRG.29219	1.78695	0.000332384	0.0117251
ENSOSIG00000023596	1.88343	0.000334099	0.01176
ENSOSIG00000008734	-1.01426	0.000335663	0.0117906
ENSOSIG00000016015	1.92531	0.000335927	0.0117906
MSTRG.18209	2.04952	0.000336941	0.0118093
MSTRG.25064	2.08458	0.000341261	0.0119267
ENSOSIG00000016324	2.0325	0.000341781	0.0119279
ENSOSIG00000017019	1.58522	0.000345324	0.0120344
ENSOSIG00000006738	-2.30742	0.000347518	0.0120937
MSTRG.10019	1.97338	0.000348978	0.0121199
ENSOSIG00000006851	2.81292	0.000349257	0.0121199
ENSOSIG00000017611	1.77938	0.000349862	0.0121238
ENSOSIG00000020993	-1.13282	0.000351866	0.012176
ENSOSIG00000023287	1.68017	0.000352859	0.0121932
ENSOSIG00000014309	1.71735	0.000354546	0.0122343
ENSOSIG00000015325	-1.11514	0.000358649	0.0123264
ENSOSIG00000013407	-1.73454	0.00035872	0.0123264
ENSOSIG00000004423	-1.19079	0.000359539	0.0123373
ENSOSIG00000002428	1.93767	0.000360198	0.0123427
MSTRG.25965	2.24636	0.000363372	0.0124223
ENSOSIG00000009526	9.79171	0.000363531	0.0124223
ENSOSIG00000017040	-1.02062	0.000365806	0.0124653
ENSOSIG00000009092	1.58584	0.000368619	0.0125264
ENSOSIG00000014826	1.94906	0.000372358	0.0126186
ENSOSIG00000022152	1.53769	0.000373192	0.012625
ENSOSIG00000009609	1.46142	0.000373575	0.012625
ENSOSIG00000009146	1.68226	0.000377567	0.0127075
ENSOSIG00000020533	-1.35604	0.000378237	0.0127126
ENSOSIG00000002640	-1.39181	0.000381595	0.012761
ENSOSIG00000021370	1.99122	0.000381624	0.012761
ENSOSIG00000014318	-1.4797	0.000382912	0.0127734
MSTRG.35828	2.00708	0.00038333	0.0127734
ENSOSIG00000023985	-1.18487	0.000383685	0.0127734
ENSOSIG00000013321	-1.19429	0.000386061	0.0128177
ENSOSIG00000010617	-1.25922	0.000387669	0.0128342
ENSOSIG00000013956	1.70843	0.000388123	0.0128342
ENSOSIG00000009947	1.59556	0.000392274	0.0129366
MSTRG.11901	-1.56646	0.00039366	0.0129649
ENSOSIG00000004501	-1.1945	0.000395001	0.0129676
ENSOSIG00000002116	-1.42094	0.000395324	0.0129676
ENSOSIG00000011313	2.03914	0.000399146	0.0130755
ENSOSIG00000022683	1.70047	0.000399972	0.0130851
ENSOSIG00000003742	1.60509	0.000404738	0.0132058
ENSOSIG00000013799	-1.39772	0.000408631	0.0133152
ENSOSIG00000005706	1.56727	0.000414519	0.0134535
ENSOSIG00000016282	-1.32074	0.000416383	0.0134962
ENSOSIG00000004617	1.55501	0.00041759	0.0135175
ENSOSIG00000018711	1.59144	0.00041854	0.0135304
ENSOSIG00000022320	1.68445	0.000425055	0.0136691
ENSOSIG00000007221	-1.87187	0.000432005	0.0138744
ENSOSIG00000019577	1.45185	0.000433729	0.0138935
ENSOSIG00000000907	-1.39488	0.000435722	0.0139107
ENSOSIG00000006595	2.32742	0.000438241	0.0139652
ENSOSIG00000013247	2.43342	0.000441232	0.0140241
ENSOSIG00000012286	1.96719	0.000443028	0.0140448
MSTRG.34999	-1.56442	0.00044772	0.014157
ENSOSIG00000022973	1.59365	0.000448854	0.0141747
ENSOSIG00000023146	1.50729	0.0004496	0.01418
MSTRG.29230	2.4262	0.000456306	0.014373
ENSOSIG00000005279	1.76625	0.000465643	0.0145923
ENSOSIG00000015148	-1.38444	0.000469894	0.0146881
ENSOSIG00000019202	1.93182	0.000474168	0.0148028
MSTRG.37106	1.67248	0.000477832	0.0148794
ENSOSIG00000021944	1.66194	0.000481756	0.0149826
ENSOSIG00000019302	-1.31857	0.000488673	0.0151402
ENSOSIG00000010043	-1.37782	0.000497744	0.0153439
ENSOSIG00000023578	1.53808	0.0005037	0.0154966
MSTRG.19722	2.54925	0.000503958	0.0154966
ENSOSIG00000003745	1.51523	0.000510946	0.0156465
ENSOSIG00000005895	-2.54687	0.000513238	0.0156643
MSTRG.9353	-1.26443	0.000521981	0.0157938
ENSOSIG00000017748	-1.34287	0.000524276	0.0158437
MSTRG.13893	-1.05774	0.000531411	0.0159975
ENSOSIG00000001212	1.74931	0.000532891	0.0159975
ENSOSIG00000019656	1.57107	0.000532921	0.0159975
ENSOSIG00000005613	2.5807	0.000540661	0.0161797
ENSOSIG00000010440	-1.20981	0.00054262	0.0161988
ENSOSIG00000012653	-1.44768	0.000543343	0.0162007
ENSOSIG00000011280	1.43303	0.000550057	0.0163217
ENSOSIG00000009407	-1.10927	0.000553824	0.0164136
ENSOSIG00000023929	1.64285	0.000556458	0.016452
ENSOSIG00000001056	-1.22172	0.000557384	0.0164596
ENSOSIG00000022932	1.73551	0.000558613	0.0164661
ENSOSIG00000001931	1.69938	0.000559614	0.0164661
MSTRG.26201	1.99297	0.000562345	0.0165266
ENSOSIG00000008977	-2.60174	0.000563305	0.0165351
ENSOSIG00000016334	-1.36439	0.000564709	0.0165565
ENSOSIG00000014138	2.01237	0.000567949	0.0166316
ENSOSIG00000010553	1.56784	0.000573128	0.016737
ENSOSIG00000005618	-1.15683	0.000582471	0.0169358
ENSOSIG00000014308	1.55341	0.00058532	0.0169784
ENSOSIG00000014885	1.65972	0.000589515	0.0170598
ENSOSIG00000003982	-1.12145	0.000604926	0.0174431
ENSOSIG00000018425	1.47529	0.000605885	0.0174431
ENSOSIG00000018734	1.58311	0.000606309	0.0174431
ENSOSIG00000008325	-1.09581	0.000607886	0.017468
MSTRG.20105	1.56591	0.000609012	0.0174799
ENSOSIG00000016175	1.484	0.000614307	0.0175908
ENSOSIG00000006636	-1.26656	0.000617125	0.0176286
ENSOSIG00000010936	1.53481	0.000617781	0.0176286
ENSOSIG00000020588	2.0044	0.000626674	0.017841
MSTRG.42003	-1.55177	0.000633711	0.0180204
MSTRG.6700	2.38141	0.000634849	0.0180311
ENSOSIG00000009547	1.8082	0.000642554	0.0181588
ENSOSIG00000010299	1.71183	0.00064301	0.0181588
ENSOSIG00000019268	-1.84855	0.000644628	0.0181835
ENSOSIG00000013513	2.11276	0.000650385	0.0183039
ENSOSIG00000004852	-1.59868	0.000659414	0.0184738
ENSOSIG00000019670	-1.42764	0.000659709	0.0184738
ENSOSIG00000004284	1.52666	0.000660183	0.0184738
ENSOSIG00000013632	2.15474	0.000661472	0.0184889
ENSOSIG00000006795	1.49453	0.000670077	0.0186592
MSTRG.10614	2.72083	0.000670603	0.0186592
ENSOSIG00000002822	1.75317	0.000672419	0.0186885
ENSOSIG00000013960	1.61529	0.000677713	0.0187932
MSTRG.42844	-1.01746	0.000678516	0.0187942
ENSOSIG00000008051	-1.07709	0.00068094	0.0188401
ENSOSIG00000008531	1.5608	0.000684913	0.0189287
ENSOSIG00000009370	1.68723	0.000690019	0.019027
ENSOSIG00000005702	-1.85789	0.000695976	0.0191698
MSTRG.17523	3.42787	0.00069801	0.0191828
ENSOSIG00000004901	2.57675	0.000699989	0.0191942
ENSOSIG00000000314	2.48082	0.000703687	0.0192741
ENSOSIG00000012656	1.96772	0.000728962	0.0198999
ENSOSIG00000014898	2.11353	0.000731263	0.0199107
MSTRG.4834	-1.93941	0.00073602	0.0199677
ENSOSIG00000016055	1.95224	0.000737076	0.0199677
ENSOSIG00000017119	1.69624	0.000743907	0.0200626
ENSOSIG00000008646	-1.60246	0.000748214	0.0201567
MSTRG.12143	-1.77332	0.000750424	0.0201941
ENSOSIG00000022499	1.54355	0.000762258	0.0204485
MSTRG.36205	1.53997	0.000763277	0.0204485
MSTRG.19411	1.69327	0.000763394	0.0204485
ENSOSIG00000012528	1.60764	0.000764041	0.0204485
ENSOSIG00000005373	1.76745	0.00076589	0.0204641
ENSOSIG00000000631	2.10142	0.000767425	0.0204641
ENSOSIG00000019691	2.10781	0.000768319	0.0204641
ENSOSIG00000005595	1.62509	0.000768605	0.0204641
MSTRG.19997	2.87316	0.000769502	0.0204641
ENSOSIG00000009033	-1.00487	0.000769623	0.0204641
ENSOSIG00000015268	1.73978	0.00077415	0.0205623
ENSOSIG00000008101	-3.3281	0.000777902	0.0205906
ENSOSIG00000009816	1.59686	0.000778842	0.0205906
ENSOSIG00000014337	-1.84981	0.000778853	0.0205906
ENSOSIG00000019351	-1.22463	0.000779407	0.0205906
ENSOSIG00000008324	1.77835	0.000790711	0.0208445
ENSOSIG00000008626	2.34354	0.000792639	0.0208728
ENSOSIG00000017970	1.55913	0.00079941	0.0209837
ENSOSIG00000017045	1.43749	0.000804372	0.0210914
ENSOSIG00000014996	3.01667	0.000813169	0.021254
ENSOSIG00000010750	1.7441	0.000815111	0.0212821
ENSOSIG00000011872	-1.00458	0.000819468	0.0213505
ENSOSIG00000008074	1.62989	0.000832579	0.0216005
ENSOSIG00000004952	1.56083	0.000835359	0.0216497
ENSOSIG00000011324	-1.36723	0.000848728	0.0219415
ENSOSIG00000016475	1.68564	0.000850117	0.0219415
MSTRG.3985	-1.88133	0.000851976	0.0219415
MSTRG.35377	1.54425	0.000859861	0.0221214
ENSOSIG00000013123	-1.11576	0.000864497	0.0222141
ENSOSIG00000023646	-1.2431	0.000872894	0.0223789
ENSOSIG00000003827	1.611	0.00087429	0.0223789
ENSOSIG00000014436	1.52282	0.000884749	0.0225856
ENSOSIG00000011859	2.50266	0.000885259	0.0225856
ENSOSIG00000011675	1.46952	0.000886534	0.022586
ENSOSIG00000000029	-1.33721	0.000887115	0.022586
ENSOSIG00000011700	1.71451	0.000888927	0.0225954
ENSOSIG00000023868	1.54467	0.000889324	0.0225954
ENSOSIG00000019750	1.45343	0.000896153	0.0227454
ENSOSIG00000017654	-1.18145	0.000897514	0.0227565
ENSOSIG00000018223	-1.13117	0.000900342	0.0227788
ENSOSIG00000017772	1.87917	0.000901176	0.0227788
ENSOSIG00000015974	3.32562	0.000902996	0.0228013
MSTRG.18210	4.34798	0.000904577	0.0228178
ENSOSIG00000008604	-1.52632	0.000911765	0.0229755
ENSOSIG00000022764	1.91781	0.000921284	0.0231214
ENSOSIG00000000154	1.53504	0.000929249	0.0232469
ENSOSIG00000019758	1.52687	0.000930102	0.0232469
ENSOSIG00000023830	-1.13381	0.000932865	0.0232922
ENSOSIG00000006693	1.79812	0.000938522	0.0233483
ENSOSIG00000006127	1.52491	0.000940461	0.0233483
ENSOSIG00000016938	1.5814	0.000944402	0.0233483
ENSOSIG00000018649	1.58966	0.000944867	0.0233483
ENSOSIG00000017561	3.05664	0.000946851	0.0233566
ENSOSIG00000006598	1.56283	0.000951642	0.0234278
ENSOSIG00000005480	1.90737	0.000955754	0.0234819
ENSOSIG00000023605	-1.04118	0.000961308	0.0235712
ENSOSIG00000005600	1.46981	0.000963035	0.02359
ENSOSIG00000013178	1.49761	0.00096866	0.0237042
ENSOSIG00000012172	1.58337	0.000970231	0.023719
MSTRG.24408	2.32883	0.00097517	0.0237971
ENSOSIG00000008828	-3.0447	0.000975362	0.0237971
MSTRG.29974	1.44264	0.000977369	0.0238224
ENSOSIG00000007556	-1.08151	0.000981716	0.0238563
ENSOSIG00000010001	-1.05865	0.00098308	0.0238563
MSTRG.17154	-3.31452	0.000995955	0.024037
ENSOSIG00000017057	1.48124	0.00099989	0.0241082
MSTRG.33611	1.43817	0.00100256	0.0241126
ENSOSIG00000022148	1.53497	0.00100544	0.0241126
ENSOSIG00000018906	-1.59141	0.00100596	0.0241126
ENSOSIG00000018667	1.90078	0.00100971	0.0241789
ENSOSIG00000023665	1.58335	0.00101254	0.0242232
ENSOSIG00000022326	-2.03438	0.00101381	0.0242299
ENSOSIG00000002478	1.51189	0.00101761	0.0242971
ENSOSIG00000023129	1.82923	0.00103381	0.0246361
ENSOSIG00000008675	1.52808	0.00103626	0.0246465
ENSOSIG00000019401	1.48247	0.00104755	0.0248313
ENSOSIG00000008014	1.53633	0.00104933	0.0248371
MSTRG.8317	1.56391	0.00105064	0.0248443
ENSOSIG00000017525	-1.40294	0.00105657	0.0249365
ENSOSIG00000012910	1.63182	0.00106036	0.0250018
ENSOSIG00000011221	-1.03207	0.00107218	0.0251844
ENSOSIG00000015209	-1.01803	0.00107877	0.0252663
ENSOSIG00000013825	-1.93847	0.00108273	0.0253348
ENSOSIG00000016214	1.6521	0.00109031	0.0254395
ENSOSIG00000023281	2.57755	0.0010916	0.0254436
ENSOSIG00000003931	-2.09722	0.00109255	0.0254436
ENSOSIG00000008751	2.11373	0.00109464	0.025468
ENSOSIG00000005459	-1.06051	0.00110445	0.025672
ENSOSIG00000017974	2.29106	0.00110865	0.0257452
ENSOSIG00000006916	-1.68841	0.0011189	0.0259097
ENSOSIG00000005344	-1.396	0.00112112	0.0259367
ENSOSIG00000013283	-1.01611	0.00112685	0.0259932
ENSOSIG00000015259	-1.10919	0.00112778	0.0259932
ENSOSIG00000023118	1.46259	0.00112779	0.0259932
ENSOSIG00000016690	-1.21301	0.00113596	0.0261079
ENSOSIG00000007931	1.47436	0.00113956	0.0261419
ENSOSIG00000018818	1.56789	0.00114848	0.0263219
ENSOSIG00000021147	-1.43284	0.00115512	0.0264264
ENSOSIG00000022214	-1.16451	0.00115519	0.0264264
ENSOSIG00000009578	1.69392	0.00116404	0.0265299
ENSOSIG00000021196	1.35047	0.00116551	0.0265389
MSTRG.18534	1.50289	0.00117219	0.0265832
MSTRG.29444	1.52412	0.00118352	0.0267897
ENSOSIG00000012096	1.3846	0.00118416	0.0267897
ENSOSIG00000020258	1.69126	0.0012051	0.0271699
ENSOSIG00000013970	1.51475	0.00120539	0.0271699
ENSOSIG00000015394	1.44617	0.00120831	0.0272108
ENSOSIG00000009410	-1.12287	0.00121253	0.0272807
ENSOSIG00000011384	1.58792	0.00122588	0.0274554
ENSOSIG00000023980	1.36122	0.00122868	0.027493
ENSOSIG00000016083	1.9332	0.00123226	0.0275004
ENSOSIG00000022778	1.5098	0.0012343	0.0275185
ENSOSIG00000017571	1.68358	0.00123788	0.0275304
ENSOSIG00000018130	1.49271	0.00124599	0.027657
ENSOSIG00000011630	-1.07062	0.00125571	0.0278192
ENSOSIG00000022449	1.4865	0.00126234	0.0279367
ENSOSIG00000014114	-1.28486	0.00126329	0.0279367
ENSOSIG00000012363	1.46265	0.00126973	0.0280069
MSTRG.31436	-5.07895	0.00126981	0.0280069
MSTRG.17212	-1.50181	0.00127451	0.0280838
ENSOSIG00000022876	-1.1225	0.00127831	0.0281423
ENSOSIG00000012227	1.8047	0.00128604	0.0282619
MSTRG.18627	1.65686	0.00128818	0.0282834
ENSOSIG00000006990	1.80741	0.00128943	0.0282834
ENSOSIG00000009747	-1.34936	0.0012987	0.0283876
ENSOSIG00000013311	1.55981	0.0013	0.0283908
ENSOSIG00000022542	1.57425	0.00130307	0.0284079
MSTRG.14633	1.44531	0.00130341	0.0284079
MSTRG.20504	1.50003	0.0013143	0.0285327
MSTRG.10689	1.97552	0.00131644	0.0285468
ENSOSIG00000005916	1.69289	0.00132879	0.0287892
ENSOSIG00000015171	1.5836	0.00133282	0.0288295
ENSOSIG00000007185	1.58218	0.00133651	0.0288295
ENSOSIG00000010110	1.76968	0.00133945	0.0288676
MSTRG.10528	2.15805	0.00134927	0.0289981
ENSOSIG00000015987	-1.39231	0.00135453	0.0289981
ENSOSIG00000013340	1.44754	0.00135495	0.0289981
ENSOSIG00000018725	1.68511	0.00135765	0.0290101
ENSOSIG00000004108	-1.59662	0.00135958	0.0290101
ENSOSIG00000012714	1.49523	0.00136023	0.0290101
MSTRG.37210	-4.30771	0.00136369	0.0290586
ENSOSIG00000004444	-1.2954	0.00137363	0.0292197
ENSOSIG00000007494	1.4334	0.00137596	0.0292438
ENSOSIG00000018976	1.90232	0.00138603	0.0294325
ENSOSIG00000016838	9.5216	0.00139129	0.0294859
MSTRG.27912	-1.06764	0.00139294	0.0294859
MSTRG.28630	1.97386	0.00139295	0.0294859
MSTRG.20319	-2.49515	0.00139334	0.0294859
ENSOSIG00000023836	1.42112	0.0013992	0.0295842
ENSOSIG00000023274	1.84149	0.00140377	0.0296554
ENSOSIG00000005528	-1.31499	0.00141621	0.0298926
ENSOSIG00000017214	1.43598	0.00143218	0.0302036
ENSOSIG00000014173	1.56024	0.00143729	0.0302595
MSTRG.26955	3.80405	0.00143863	0.0302617
ENSOSIG00000007798	-1.39887	0.0014541	0.0304567
ENSOSIG00000020107	1.43387	0.00145863	0.0304974
ENSOSIG00000014719	1.67116	0.00146181	0.0304987
ENSOSIG00000011626	1.67437	0.00146295	0.0304987
ENSOSIG00000010242	2.04028	0.00146642	0.0305326
ENSOSIG00000014865	1.42718	0.00147072	0.0305832
ENSOSIG00000004295	-1.84423	0.00147134	0.0305832
ENSOSIG00000020504	1.6241	0.0014735	0.0305867
ENSOSIG00000021438	1.52205	0.00148569	0.0307655
ENSOSIG00000016742	2.07844	0.00148637	0.0307655
ENSOSIG00000010545	-1.49545	0.00148921	0.0307725
ENSOSIG00000003425	-1.22451	0.00149644	0.0308699
ENSOSIG00000010425	1.87959	0.00150008	0.030893
ENSOSIG00000005004	1.84862	0.00150548	0.0309768
ENSOSIG00000004829	1.54627	0.00150793	0.0309768
ENSOSIG00000021967	1.53131	0.00150978	0.030989
ENSOSIG00000009003	-1.17099	0.00154047	0.031566
MSTRG.36982	1.39144	0.00155567	0.0318511
ENSOSIG00000003240	1.62483	0.00157601	0.0322405
ENSOSIG00000015765	1.71432	0.00157852	0.032265
ENSOSIG00000014394	-1.26472	0.00158663	0.0323769
ENSOSIG00000011656	1.43402	0.00159333	0.0324867
ENSOSIG00000014724	1.53907	0.0016065	0.0326606
ENSOSIG00000020534	1.48373	0.00160828	0.0326606
ENSOSIG00000006909	1.84519	0.00160903	0.0326606
ENSOSIG00000011197	1.5456	0.00160983	0.0326606
ENSOSIG00000004760	1.39382	0.00161339	0.0327058
ENSOSIG00000009059	-1.094	0.00161633	0.0327383
ENSOSIG00000004548	1.47208	0.00161829	0.0327511
ENSOSIG00000018235	1.57667	0.00162369	0.0328067
MSTRG.21133	-1.2564	0.00162371	0.0328067
ENSOSIG00000023025	1.85096	0.00162828	0.032872
ENSOSIG00000017006	-1.00555	0.00163509	0.0329554
ENSOSIG00000009491	2.93682	0.00164875	0.0331762
ENSOSIG00000007570	-1.12982	0.00165252	0.0331976
MSTRG.18061	-1.89013	0.00165637	0.0332322
ENSOSIG00000007995	-1.10918	0.00165694	0.0332322
ENSOSIG00000019888	-1.84145	0.00167101	0.0334028
ENSOSIG00000010558	-1.08064	0.00167361	0.0334028
ENSOSIG00000014916	1.40158	0.00169164	0.0336807
ENSOSIG00000023728	1.51191	0.00169396	0.0336996
ENSOSIG00000004984	-1.19529	0.00169791	0.0337501
ENSOSIG00000007346	1.64796	0.00169946	0.0337501
ENSOSIG00000016009	1.49676	0.00170111	0.0337501
ENSOSIG00000013667	2.27651	0.0017428	0.0343925
ENSOSIG00000018897	1.55588	0.00175169	0.0345089
ENSOSIG00000023802	-1.00332	0.0017529	0.0345089
ENSOSIG00000018388	1.64139	0.00175903	0.0345825
ENSOSIG00000012246	1.57678	0.00176086	0.0345825
ENSOSIG00000017544	1.44123	0.00176501	0.0345991
ENSOSIG00000022011	-3.56657	0.00178694	0.0348993
ENSOSIG00000020333	1.57551	0.00178974	0.0349263
ENSOSIG00000019229	-1.07779	0.0017946	0.0349732
ENSOSIG00000010681	2.03205	0.00179543	0.0349732
ENSOSIG00000007631	-1.02582	0.00180005	0.0350162
ENSOSIG00000018116	1.47065	0.0018126	0.0352046
ENSOSIG00000022284	-1.814	0.00181608	0.0352271
MSTRG.2419	1.875	0.00182365	0.0353182
ENSOSIG00000005872	1.52985	0.0018242	0.0353182
ENSOSIG00000017497	1.80345	0.0018282	0.0353678
ENSOSIG00000014093	-4.99972	0.00183598	0.0354345
MSTRG.1937	3.02477	0.00184871	0.0356225
ENSOSIG00000019483	-1.35976	0.00184927	0.0356225
MSTRG.13747	-1.42905	0.00185007	0.0356225
ENSOSIG00000019022	1.47368	0.00185638	0.0356738
ENSOSIG00000004973	1.6216	0.0018573	0.0356738
ENSOSIG00000013578	2.38315	0.00185732	0.0356738
MSTRG.54	-1.22169	0.00185989	0.0356738
ENSOSIG00000004489	2.011	0.00185999	0.0356738
ENSOSIG00000016732	1.72429	0.00186216	0.0356876
ENSOSIG00000000245	1.45083	0.00187289	0.0358652
ENSOSIG00000008417	1.63074	0.00187478	0.0358735
ENSOSIG00000004583	1.44269	0.00188093	0.0359632
ENSOSIG00000019813	1.97947	0.00188742	0.0360591
ENSOSIG00000005944	-1.04043	0.00190043	0.0362513
ENSOSIG00000017359	1.52359	0.00190423	0.0362956
ENSOSIG00000015428	-1.15694	0.00191382	0.0364501
ENSOSIG00000006650	1.53185	0.00194576	0.0368869
ENSOSIG00000017539	1.74944	0.00196303	0.0371569
ENSOSIG00000014307	1.41588	0.00196822	0.0371692
ENSOSIG00000013780	-1.17905	0.0019786	0.0373084
ENSOSIG00000013320	1.49074	0.00197863	0.0373084
ENSOSIG00000001923	1.59924	0.00198336	0.0373689
ENSOSIG00000018372	1.39912	0.00200849	0.0377267
ENSOSIG00000011666	1.61159	0.00202606	0.0379589
ENSOSIG00000024024	1.91339	0.00203554	0.0380602
ENSOSIG00000016895	-1.06029	0.0020454	0.0381864
ENSOSIG00000000485	-1.51987	0.00205551	0.0382653
ENSOSIG00000017627	1.46972	0.00205585	0.0382653
MSTRG.17971	1.62567	0.00207117	0.0384922
ENSOSIG00000000399	1.45103	0.00207278	0.0384929
ENSOSIG00000015003	1.77357	0.00207457	0.038497
ENSOSIG00000011641	1.57927	0.00208614	0.0386386
ENSOSIG00000022159	1.80316	0.00208894	0.0386386
ENSOSIG00000020444	1.49557	0.00209282	0.0386386
ENSOSIG00000017950	2.34314	0.00209958	0.0387271
ENSOSIG00000020898	1.73765	0.00210395	0.0387787
ENSOSIG00000011201	1.38033	0.00210721	0.0388097
MSTRG.35235	1.52252	0.00212712	0.0390963
ENSOSIG00000018816	-1.58181	0.00212755	0.0390963
ENSOSIG00000003380	1.72559	0.0021413	0.0392901
ENSOSIG00000012550	1.54726	0.00214662	0.0393585
ENSOSIG00000011069	1.39599	0.00215369	0.0394585
ENSOSIG00000011160	1.52195	0.00216016	0.0395255
ENSOSIG00000022483	-2.57116	0.00216136	0.0395255
ENSOSIG00000019488	1.53951	0.00216217	0.0395255
ENSOSIG00000023577	1.43675	0.00217229	0.0396811
ENSOSIG00000022628	1.52719	0.00218353	0.0398558
ENSOSIG00000021199	1.85153	0.00218527	0.0398558
ENSOSIG00000015807	1.66488	0.00218834	0.0398558
ENSOSIG00000004481	1.58437	0.00219586	0.0399458
ENSOSIG00000001003	1.39009	0.00219817	0.0399458
ENSOSIG00000018705	1.78358	0.00221722	0.0401668
MSTRG.6987	1.44312	0.0022185	0.0401668
ENSOSIG00000019647	-1.1944	0.00222597	0.0402131
ENSOSIG00000015051	1.50236	0.00223734	0.0403592
ENSOSIG00000019085	1.57199	0.00225717	0.040687
ENSOSIG00000016298	1.77953	0.00226251	0.0407025
ENSOSIG00000001505	-1.01855	0.00227072	0.0407817
ENSOSIG00000022958	-2.49597	0.00228408	0.0409916
ENSOSIG00000015437	1.89811	0.00230044	0.0411949
ENSOSIG00000000785	1.60943	0.00230421	0.0412325
ENSOSIG00000017297	1.77556	0.00231611	0.0414144
ENSOSIG00000000961	1.45306	0.00231944	0.0414144
MSTRG.32752	1.32662	0.00232391	0.0414641
MSTRG.14519	-1.34227	0.00233654	0.0416592
ENSOSIG00000011952	1.56654	0.0023464	0.0417744
ENSOSIG00000015557	1.58256	0.00236344	0.0420326
ENSOSIG00000015587	1.65045	0.00236432	0.0420326
ENSOSIG00000003525	1.35031	0.00238008	0.042221
ENSOSIG00000004558	1.5538	0.00238371	0.042249
ENSOSIG00000009652	1.44509	0.00238509	0.042249
ENSOSIG00000007687	-1.05459	0.00239105	0.0422589
ENSOSIG00000016480	1.60934	0.00239198	0.0422589
ENSOSIG00000007099	-1.46599	0.00239729	0.0423125
ENSOSIG00000018144	2.01299	0.00240163	0.0423587
ENSOSIG00000000941	1.81397	0.00240502	0.0423881
ENSOSIG00000019533	1.47869	0.00240926	0.0424323
MSTRG.22616	2.63612	0.00242023	0.042595
ENSOSIG00000015945	1.41561	0.00242286	0.0426108
ENSOSIG00000020798	1.62505	0.00242685	0.0426504
ENSOSIG00000017315	1.44141	0.00242962	0.0426601
ENSOSIG00000019672	-2.69218	0.00243545	0.0426601
ENSOSIG00000015761	1.49667	0.00243564	0.0426601
MSTRG.20935	1.66929	0.00243608	0.0426601
ENSOSIG00000019461	1.55705	0.00244258	0.0427434
ENSOSIG00000021427	1.44837	0.00245675	0.0429303
ENSOSIG00000019726	1.50471	0.00246108	0.0429398
ENSOSIG00000021599	2.47543	0.00246429	0.0429398
ENSOSIG00000023855	1.78054	0.00248613	0.0432319
MSTRG.16959	-2.41857	0.00248633	0.0432319
ENSOSIG00000011864	2.44131	0.00250001	0.0434025
ENSOSIG00000021352	1.43962	0.0025023	0.0434025
ENSOSIG00000006624	1.31468	0.00251045	0.0434944
MSTRG.27775	-1.04571	0.00251205	0.0434944
MSTRG.16853	2.39377	0.00251477	0.0435108
ENSOSIG00000006635	1.60072	0.00252401	0.0436093
ENSOSIG00000019641	1.47358	0.00253093	0.0436562
ENSOSIG00000003468	-1.40015	0.00253339	0.0436562
ENSOSIG00000020777	1.81799	0.00253548	0.0436562
ENSOSIG00000005990	1.40906	0.00253811	0.0436687
ENSOSIG00000009594	-1.18512	0.00255258	0.0438868
MSTRG.5756	-1.50252	0.00256122	0.0439979
ENSOSIG00000000338	1.66928	0.00256262	0.0439979
ENSOSIG00000008011	1.47504	0.00257321	0.0441181
ENSOSIG00000021674	1.70147	0.002577	0.04414
MSTRG.39202	-1.08706	0.00258254	0.0441855
ENSOSIG00000006569	1.71718	0.00259078	0.0442957
MSTRG.38287	1.74216	0.00261298	0.0446442
MSTRG.13251	1.74333	0.00262168	0.0446995
ENSOSIG00000014457	2.17362	0.00263853	0.0449245
ENSOSIG00000017522	1.37106	0.00265404	0.0450963
ENSOSIG00000014661	1.70458	0.00265607	0.0450963
ENSOSIG00000020274	1.40956	0.00265711	0.0450963
ENSOSIG00000004916	-1.50175	0.00266905	0.0452247
ENSOSIG00000007280	4.39147	0.00269458	0.0456096
ENSOSIG00000020548	1.48445	0.00272077	0.0459428
ENSOSIG00000005190	2.0125	0.00272708	0.0459686
ENSOSIG00000009210	1.38175	0.00272802	0.0459686
ENSOSIG00000016731	-2.34572	0.00272856	0.0459686
ENSOSIG00000006542	1.60336	0.00272979	0.0459686
ENSOSIG00000016167	-1.63946	0.00274273	0.0460917
ENSOSIG00000014886	1.49811	0.00276362	0.0464111
ENSOSIG00000014198	1.46575	0.00278708	0.0467085
ENSOSIG00000003705	1.39724	0.00278873	0.0467085
ENSOSIG00000012385	1.3986	0.00280947	0.0469245
ENSOSIG00000013774	1.47138	0.00285055	0.0474494
ENSOSIG00000023701	1.46561	0.00286018	0.0475774
MSTRG.30150	1.59551	0.00287276	0.0477542
ENSOSIG00000001027	-1.16969	0.00287717	0.0477953
ENSOSIG00000006143	-2.82712	0.0029047	0.0482074
ENSOSIG00000014574	1.37883	0.0029059	0.0482074
MSTRG.26377	1.49509	0.00290939	0.0482287
ENSOSIG00000020354	1.6142	0.00293588	0.0484779
ENSOSIG00000005853	1.49645	0.00293695	0.0484779
ENSOSIG00000022993	1.4698	0.00293841	0.0484779
ENSOSIG00000005423	-1.24226	0.00294362	0.0485055
MSTRG.1624	3.1835	0.00296808	0.0488105
ENSOSIG00000000656	1.42812	0.00298852	0.0491136
ENSOSIG00000017990	1.64079	0.0029934	0.049161
ENSOSIG00000009067	1.39611	0.00300131	0.0492049
ENSOSIG00000007715	1.99005	0.00300345	0.0492049
ENSOSIG00000000443	-1.11991	0.00300609	0.0492049
ENSOSIG00000023560	1.6293	0.00301636	0.0493074
ENSOSIG00000014687	1.91761	0.0030194	0.0493098
ENSOSIG00000008332	1.97575	0.00302053	0.0493098
ENSOSIG00000008620	-1.02988	0.00304567	0.0496301
ENSOSIG00000000714	-1.75171	0.0030462	0.0496301
ENSOSIG00000017060	1.47498	0.00305195	0.0496908
