# Supplementary material for: Transcriptome Analysis of the Developmental Effects of Bisphenol F Exposure in Chinese Medaka (Oryzias sinensis)
Source: Int J Mol Sci. 2023 Jun 30;24(13):10898. doi: 10.3390/ijms241310898 (PMC10341846; doi:10.3390/ijms241310898)
Supplement: Supplementary file 1 [file ijms-24-10898-s001.zip › Table S3 GO Control vs BPF200.xlsx]

## Sheet: Control-vs-BPF200
Cellular Component
GO ID	Description	Control-vs-BPF200 (4)	All (15955)	pvalue	p.adjust	Genes
GO:0009331	glycerol-3-phosphate dehydrogenase complex	1	31	0.00774996	0.0361665	ENSOSIG00000023216(--)
GO:0009342	glutamate synthase complex (NADPH)	1	31	0.00774996	0.0361665	ENSOSIG00000023216(--)
GO:0031026	glutamate synthase complex	1	31	0.00774996	0.0361665	ENSOSIG00000023216(--)
Molecular Function
GO ID	Description	Control-vs-BPF200 (6)	All (18555)	pvalue	p.adjust	Genes
GO:0004866	endopeptidase inhibitor activity	2	151	0.000965926	0.0337822	ENSOSIG00000006019(c3);ENSOSIG00000006282(c3)
GO:0061135	endopeptidase regulator activity	2	164	0.00113787	0.0337822	ENSOSIG00000006019(c3);ENSOSIG00000006282(c3)
GO:0030414	peptidase inhibitor activity	2	165	0.00115167	0.0337822	ENSOSIG00000006019(c3);ENSOSIG00000006282(c3)
GO:0061134	peptidase regulator activity	2	211	0.00187334	0.0341241	ENSOSIG00000006019(c3);ENSOSIG00000006282(c3)
GO:0018659	4-hydroxybenzoate 3-monooxygenase activity	1	6	0.00193887	0.0341241	ENSOSIG00000023216(--)
GO:0004499	N,N-dimethylaniline monooxygenase activity	1	10	0.00322971	0.0406021	ENSOSIG00000023216(--)
GO:0050151	oleate hydratase activity	1	10	0.00322971	0.0406021	ENSOSIG00000023216(--)
GO:0046608	carotenoid isomerase activity	1	14	0.00451916	0.0446317	ENSOSIG00000023216(--)
GO:0050451	CoA-disulfide reductase activity	1	20	0.00645072	0.0446317	ENSOSIG00000023216(--)
GO:0016152	mercury (II) reductase activity	1	22	0.00709388	0.0446317	ENSOSIG00000023216(--)
GO:0008767	UDP-galactopyranose mutase activity	1	23	0.00741533	0.0446317	ENSOSIG00000023216(--)
GO:0004729	oxygen-dependent protoporphyrinogen oxidase activity	1	28	0.00902129	0.0446317	ENSOSIG00000023216(--)
GO:0070818	protoporphyrinogen oxidase activity	1	28	0.00902129	0.0446317	ENSOSIG00000023216(--)
GO:0008373	sialyltransferase activity	1	29	0.00934222	0.0446317	ENSOSIG00000008968(ST3GAL4)
GO:0016723	oxidoreductase activity, acting on metal ions, NAD or NADP as acceptor	1	29	0.00934222	0.0446317	ENSOSIG00000023216(--)
GO:0004368	glycerol-3-phosphate dehydrogenase (quinone) activity	1	30	0.00966306	0.0446317	ENSOSIG00000023216(--)
GO:0016647	oxidoreductase activity, acting on the CH-NH group of donors, oxygen as acceptor	1	32	0.0103045	0.0446317	ENSOSIG00000023216(--)
GO:0016901	oxidoreductase activity, acting on the CH-OH group of donors, quinone or similar compound as acceptor	1	32	0.0103045	0.0446317	ENSOSIG00000023216(--)
GO:0016166	phytoene dehydrogenase activity	1	35	0.011266	0.0446317	ENSOSIG00000023216(--)
GO:0004355	glutamate synthase (NADPH) activity	1	36	0.0115863	0.0446317	ENSOSIG00000023216(--)
GO:0016634	oxidoreductase activity, acting on the CH-CH group of donors, oxygen as acceptor	1	36	0.0115863	0.0446317	ENSOSIG00000023216(--)
GO:0016722	oxidoreductase activity, acting on metal ions	1	36	0.0115863	0.0446317	ENSOSIG00000023216(--)
GO:0045181	glutamate synthase activity, NAD(P)H as acceptor	1	40	0.0128667	0.0446317	ENSOSIG00000023216(--)
GO:0004148	dihydrolipoyl dehydrogenase activity	1	41	0.0131866	0.0446317	ENSOSIG00000023216(--)
GO:0045550	geranylgeranyl reductase activity	1	41	0.0131866	0.0446317	ENSOSIG00000023216(--)
GO:0070403	NAD+ binding	1	41	0.0131866	0.0446317	ENSOSIG00000023216(--)
GO:0016639	oxidoreductase activity, acting on the CH-NH2 group of donors, NAD or NADP as acceptor	1	44	0.0141458	0.0454625	ENSOSIG00000023216(--)
GO:0004791	thioredoxin-disulfide reductase activity	1	45	0.0144653	0.0454625	ENSOSIG00000023216(--)
GO:0015930	glutamate synthase activity	1	47	0.0151042	0.0458333	ENSOSIG00000023216(--)
