# Supplementary material for: Transcriptome Analysis of the Developmental Effects of Bisphenol F Exposure in Chinese Medaka (Oryzias sinensis)
Source: Int J Mol Sci. 2023 Jun 30;24(13):10898. doi: 10.3390/ijms241310898 (PMC10341846; doi:10.3390/ijms241310898)
Supplement: Supplementary file 1 [file ijms-24-10898-s001.zip › Table S4 GO Control vs BPF2000.xlsx]

## Sheet: Control-vs-BPF2000
Biological Process
GO ID	Description	Control-vs-BPF2000 (717)	All (17856)	pvalue	p.adjust	Genes
GO:0086010	membrane depolarization during action potential	11	28	4.6625e-09	2.73176e-05	ENSOSIG00000000211(KCNH2);ENSOSIG00000001212(CACNA1H);ENSOSIG00000001923(ANK3);ENSOSIG00000004013(Cacna1c);ENSOSIG00000004385(CAV3);ENSOSIG00000008429(CACNA1D);ENSOSIG00000010340(Cacna1c);ENSOSIG00000010936(Scn8a);ENSOSIG00000016403(CACNA1E);ENSOSIG00000019577(Ank3);ENSOSIG00000021196(Ank3)
GO:0010880	regulation of release of sequestered calcium ion into cytosol by sarcoplasmic reticulum	9	26	4.36211e-07	0.00061626	ENSOSIG00000001923(ANK3);ENSOSIG00000002917(METTL21C);ENSOSIG00000004013(Cacna1c);ENSOSIG00000009442(METTL21C);ENSOSIG00000010340(Cacna1c);ENSOSIG00000010718(dhrs7ca);ENSOSIG00000014319(stac3);ENSOSIG00000018946(CASQ1);ENSOSIG00000019577(Ank3)
GO:0014808	release of sequestered calcium ion into cytosol by sarcoplasmic reticulum	9	26	4.36211e-07	0.00061626	ENSOSIG00000001923(ANK3);ENSOSIG00000002917(METTL21C);ENSOSIG00000004013(Cacna1c);ENSOSIG00000009442(METTL21C);ENSOSIG00000010340(Cacna1c);ENSOSIG00000010718(dhrs7ca);ENSOSIG00000014319(stac3);ENSOSIG00000018946(CASQ1);ENSOSIG00000019577(Ank3)
GO:0030449	regulation of complement activation	9	26	4.36211e-07	0.00061626	ENSOSIG00000000591(CPB2);ENSOSIG00000006595(c5ar1);ENSOSIG00000008525(CFHR2);ENSOSIG00000008589(F2);ENSOSIG00000010635(CFH);ENSOSIG00000013368(CFHR2);ENSOSIG00000014165(C8A);ENSOSIG00000016538(c9);ENSOSIG00000023590(ADAMTS15)
GO:0070296	sarcoplasmic reticulum calcium ion transport	9	27	6.31091e-07	0.00061626	ENSOSIG00000001923(ANK3);ENSOSIG00000002917(METTL21C);ENSOSIG00000004013(Cacna1c);ENSOSIG00000009442(METTL21C);ENSOSIG00000010340(Cacna1c);ENSOSIG00000010718(dhrs7ca);ENSOSIG00000014319(stac3);ENSOSIG00000018946(CASQ1);ENSOSIG00000019577(Ank3)
GO:1903514	release of sequestered calcium ion into cytosol by endoplasmic reticulum	9	27	6.31091e-07	0.00061626	ENSOSIG00000001923(ANK3);ENSOSIG00000002917(METTL21C);ENSOSIG00000004013(Cacna1c);ENSOSIG00000009442(METTL21C);ENSOSIG00000010340(Cacna1c);ENSOSIG00000010718(dhrs7ca);ENSOSIG00000014319(stac3);ENSOSIG00000018946(CASQ1);ENSOSIG00000019577(Ank3)
GO:2000257	regulation of protein activation cascade	9	28	8.97028e-07	0.000750812	ENSOSIG00000000591(CPB2);ENSOSIG00000006595(c5ar1);ENSOSIG00000008525(CFHR2);ENSOSIG00000008589(F2);ENSOSIG00000010635(CFH);ENSOSIG00000013368(CFHR2);ENSOSIG00000014165(C8A);ENSOSIG00000016538(c9);ENSOSIG00000023590(ADAMTS15)
GO:0006956	complement activation	10	37	1.33204e-06	0.000975553	ENSOSIG00000000591(CPB2);ENSOSIG00000006595(c5ar1);ENSOSIG00000008525(CFHR2);ENSOSIG00000008589(F2);ENSOSIG00000010635(CFH);ENSOSIG00000013368(CFHR2);ENSOSIG00000014165(C8A);ENSOSIG00000016538(c9);ENSOSIG00000023590(ADAMTS15);MSTRG.18161(CFI)
GO:0002673	regulation of acute inflammatory response	11	53	6.6143e-06	0.00361274	ENSOSIG00000000591(CPB2);ENSOSIG00000006595(c5ar1);ENSOSIG00000008525(CFHR2);ENSOSIG00000008589(F2);ENSOSIG00000010635(CFH);ENSOSIG00000013368(CFHR2);ENSOSIG00000014165(C8A);ENSOSIG00000016538(c9);ENSOSIG00000018425(ASH1L);ENSOSIG00000023590(ADAMTS15);MSTRG.18161(CFI)
GO:0051282	regulation of sequestering of calcium ion	15	97	7.11348e-06	0.00361274	ENSOSIG00000000399(PLCB4);ENSOSIG00000001923(ANK3);ENSOSIG00000002596(ACBD7);ENSOSIG00000002917(METTL21C);ENSOSIG00000004013(Cacna1c);ENSOSIG00000008589(F2);ENSOSIG00000009442(METTL21C);ENSOSIG00000010340(Cacna1c);ENSOSIG00000010718(dhrs7ca);ENSOSIG00000014319(stac3);ENSOSIG00000015858(ANXA6);ENSOSIG00000018946(CASQ1);ENSOSIG00000019076(--);ENSOSIG00000019577(Ank3);ENSOSIG00000020175(wnt5b)
GO:0051283	negative regulation of sequestering of calcium ion	15	97	7.11348e-06	0.00361274	ENSOSIG00000000399(PLCB4);ENSOSIG00000001923(ANK3);ENSOSIG00000002596(ACBD7);ENSOSIG00000002917(METTL21C);ENSOSIG00000004013(Cacna1c);ENSOSIG00000008589(F2);ENSOSIG00000009442(METTL21C);ENSOSIG00000010340(Cacna1c);ENSOSIG00000010718(dhrs7ca);ENSOSIG00000014319(stac3);ENSOSIG00000015858(ANXA6);ENSOSIG00000018946(CASQ1);ENSOSIG00000019076(--);ENSOSIG00000019577(Ank3);ENSOSIG00000020175(wnt5b)
GO:0006735	NADH regeneration	7	20	8.01599e-06	0.00361274	ENSOSIG00000002169(ENO3);ENSOSIG00000011836(gapdh);ENSOSIG00000012953(Aldoa);ENSOSIG00000014394(tpi1b);ENSOSIG00000021714(SORD);ENSOSIG00000022906(PGAM2);ENSOSIG00000023167(GPI)
GO:0086012	membrane depolarization during cardiac muscle cell action potential	7	20	8.01599e-06	0.00361274	ENSOSIG00000001923(ANK3);ENSOSIG00000004013(Cacna1c);ENSOSIG00000004385(CAV3);ENSOSIG00000008429(CACNA1D);ENSOSIG00000010340(Cacna1c);ENSOSIG00000019577(Ank3);ENSOSIG00000021196(Ank3)
GO:0006957	complement activation, alternative pathway	6	14	9.35036e-06	0.00381443	ENSOSIG00000008525(CFHR2);ENSOSIG00000010635(CFH);ENSOSIG00000013368(CFHR2);ENSOSIG00000014165(C8A);ENSOSIG00000016538(c9);ENSOSIG00000023590(ADAMTS15)
GO:0060306	regulation of membrane repolarization	8	28	9.88712e-06	0.00381443	ENSOSIG00000000211(KCNH2);ENSOSIG00000001923(ANK3);ENSOSIG00000002428(KCNA5);ENSOSIG00000004013(Cacna1c);ENSOSIG00000004385(CAV3);ENSOSIG00000008429(CACNA1D);ENSOSIG00000010340(Cacna1c);ENSOSIG00000019577(Ank3)
GO:0051208	sequestering of calcium ion	15	100	1.04166e-05	0.00381443	ENSOSIG00000000399(PLCB4);ENSOSIG00000001923(ANK3);ENSOSIG00000002596(ACBD7);ENSOSIG00000002917(METTL21C);ENSOSIG00000004013(Cacna1c);ENSOSIG00000008589(F2);ENSOSIG00000009442(METTL21C);ENSOSIG00000010340(Cacna1c);ENSOSIG00000010718(dhrs7ca);ENSOSIG00000014319(stac3);ENSOSIG00000015858(ANXA6);ENSOSIG00000018946(CASQ1);ENSOSIG00000019076(--);ENSOSIG00000019577(Ank3);ENSOSIG00000020175(wnt5b)
GO:0051899	membrane depolarization	13	78	1.25401e-05	0.00432191	ENSOSIG00000000211(KCNH2);ENSOSIG00000001212(CACNA1H);ENSOSIG00000001923(ANK3);ENSOSIG00000004013(Cacna1c);ENSOSIG00000004385(CAV3);ENSOSIG00000007221(--);ENSOSIG00000008429(CACNA1D);ENSOSIG00000010340(Cacna1c);ENSOSIG00000010936(Scn8a);ENSOSIG00000016403(CACNA1E);ENSOSIG00000018371(KMT2A);ENSOSIG00000019577(Ank3);ENSOSIG00000021196(Ank3)
GO:1901685	glutathione derivative metabolic process	5	10	2.19274e-05	0.00676172	ENSOSIG00000000087(ESD);ENSOSIG00000005423(GSTK1);ENSOSIG00000010511(GSTA4);ENSOSIG00000011126(MGST1);ENSOSIG00000022777(GSTM3)
GO:1901687	glutathione derivative biosynthetic process	5	10	2.19274e-05	0.00676172	ENSOSIG00000000087(ESD);ENSOSIG00000005423(GSTK1);ENSOSIG00000010511(GSTA4);ENSOSIG00000011126(MGST1);ENSOSIG00000022777(GSTM3)
GO:0072376	protein activation cascade	10	51	2.93879e-05	0.00860918	ENSOSIG00000000591(CPB2);ENSOSIG00000006595(c5ar1);ENSOSIG00000008525(CFHR2);ENSOSIG00000008589(F2);ENSOSIG00000009825(F10);ENSOSIG00000010635(CFH);ENSOSIG00000013368(CFHR2);ENSOSIG00000014165(C8A);ENSOSIG00000016538(c9);ENSOSIG00000023590(ADAMTS15)
GO:0061621	canonical glycolysis	6	17	3.47446e-05	0.00885039	ENSOSIG00000002169(ENO3);ENSOSIG00000011836(gapdh);ENSOSIG00000012953(Aldoa);ENSOSIG00000014394(tpi1b);ENSOSIG00000022906(PGAM2);ENSOSIG00000023167(GPI)
GO:0061718	glucose catabolic process to pyruvate	6	17	3.47446e-05	0.00885039	ENSOSIG00000002169(ENO3);ENSOSIG00000011836(gapdh);ENSOSIG00000012953(Aldoa);ENSOSIG00000014394(tpi1b);ENSOSIG00000022906(PGAM2);ENSOSIG00000023167(GPI)
GO:0099623	regulation of cardiac muscle cell membrane repolarization	6	17	3.47446e-05	0.00885039	ENSOSIG00000000211(KCNH2);ENSOSIG00000001923(ANK3);ENSOSIG00000002428(KCNA5);ENSOSIG00000004385(CAV3);ENSOSIG00000008429(CACNA1D);ENSOSIG00000019577(Ank3)
GO:0033292	T-tubule organization	4	6	3.62535e-05	0.00885039	ENSOSIG00000001923(ANK3);ENSOSIG00000004385(CAV3);ENSOSIG00000014319(stac3);ENSOSIG00000019577(Ank3)
GO:0035637	multicellular organismal signaling	17	143	6.1476e-05	0.0144075	ENSOSIG00000000211(KCNH2);ENSOSIG00000001212(CACNA1H);ENSOSIG00000001923(ANK3);ENSOSIG00000002428(KCNA5);ENSOSIG00000004013(Cacna1c);ENSOSIG00000008429(CACNA1D);ENSOSIG00000010340(Cacna1c);ENSOSIG00000010936(Scn8a);ENSOSIG00000013311(ATP2B1);ENSOSIG00000015495(ATP2B2);ENSOSIG00000016403(CACNA1E);ENSOSIG00000018946(CASQ1);ENSOSIG00000019577(Ank3);ENSOSIG00000021196(Ank3);ENSOSIG00000022107(P2RX5);…
GO:0070252	actin-mediated cell contraction	14	104	6.99042e-05	0.0153363	ENSOSIG00000000211(KCNH2);ENSOSIG00000001923(ANK3);ENSOSIG00000002428(KCNA5);ENSOSIG00000004013(Cacna1c);ENSOSIG00000004385(CAV3);ENSOSIG00000008429(CACNA1D);ENSOSIG00000008805(myl1);ENSOSIG00000010340(Cacna1c);ENSOSIG00000010848(MYBPC3);ENSOSIG00000011095(--);ENSOSIG00000012712(FXYD6);ENSOSIG00000015050(TNNC2);ENSOSIG00000018414(NEB);ENSOSIG00000019577(Ank3)
GO:0086002	cardiac muscle cell action potential involved in contraction	8	36	7.2421e-05	0.0153363	ENSOSIG00000000211(KCNH2);ENSOSIG00000001923(ANK3);ENSOSIG00000002428(KCNA5);ENSOSIG00000004013(Cacna1c);ENSOSIG00000004385(CAV3);ENSOSIG00000008429(CACNA1D);ENSOSIG00000010340(Cacna1c);ENSOSIG00000019577(Ank3)
GO:0006941	striated muscle contraction	17	145	7.32915e-05	0.0153363	ENSOSIG00000000211(KCNH2);ENSOSIG00000001923(ANK3);ENSOSIG00000002428(KCNA5);ENSOSIG00000004013(Cacna1c);ENSOSIG00000004385(CAV3);ENSOSIG00000008429(CACNA1D);ENSOSIG00000008805(myl1);ENSOSIG00000010340(Cacna1c);ENSOSIG00000010848(MYBPC3);ENSOSIG00000012712(FXYD6);ENSOSIG00000012953(Aldoa);ENSOSIG00000014319(stac3);ENSOSIG00000015050(TNNC2);ENSOSIG00000018723(--);ENSOSIG00000018946(CASQ1);ENSOSIG0…
GO:0051209	release of sequestered calcium ion into cytosol	13	93	8.49574e-05	0.0164164	ENSOSIG00000001923(ANK3);ENSOSIG00000002596(ACBD7);ENSOSIG00000002917(METTL21C);ENSOSIG00000004013(Cacna1c);ENSOSIG00000008589(F2);ENSOSIG00000009442(METTL21C);ENSOSIG00000010340(Cacna1c);ENSOSIG00000010718(dhrs7ca);ENSOSIG00000014319(stac3);ENSOSIG00000018946(CASQ1);ENSOSIG00000019076(--);ENSOSIG00000019577(Ank3);ENSOSIG00000020175(wnt5b)
GO:0006959	humoral immune response	16	133	8.69981e-05	0.0164164	ENSOSIG00000000591(CPB2);ENSOSIG00000006595(c5ar1);ENSOSIG00000008525(CFHR2);ENSOSIG00000008589(F2);ENSOSIG00000010635(CFH);ENSOSIG00000011836(gapdh);ENSOSIG00000013368(CFHR2);ENSOSIG00000014165(C8A);ENSOSIG00000016538(c9);ENSOSIG00000019076(--);ENSOSIG00000019725(SPON2);ENSOSIG00000021778(lys);ENSOSIG00000022574(tf);ENSOSIG00000023167(GPI);ENSOSIG00000023590(ADAMTS15);MSTRG.18161(CFI)
GO:0051279	regulation of release of sequestered calcium ion into cytosol	11	69	8.82878e-05	0.0164164	ENSOSIG00000001923(ANK3);ENSOSIG00000002596(ACBD7);ENSOSIG00000002917(METTL21C);ENSOSIG00000004013(Cacna1c);ENSOSIG00000008589(F2);ENSOSIG00000009442(METTL21C);ENSOSIG00000010340(Cacna1c);ENSOSIG00000010718(dhrs7ca);ENSOSIG00000014319(stac3);ENSOSIG00000018946(CASQ1);ENSOSIG00000019577(Ank3)
GO:0006007	glucose catabolic process	7	28	9.24634e-05	0.0164164	ENSOSIG00000002169(ENO3);ENSOSIG00000004889(ldha);ENSOSIG00000011836(gapdh);ENSOSIG00000012953(Aldoa);ENSOSIG00000014394(tpi1b);ENSOSIG00000022906(PGAM2);ENSOSIG00000023167(GPI)
GO:0086091	regulation of heart rate by cardiac conduction	7	28	9.24634e-05	0.0164164	ENSOSIG00000000211(KCNH2);ENSOSIG00000001923(ANK3);ENSOSIG00000002428(KCNA5);ENSOSIG00000004013(Cacna1c);ENSOSIG00000008429(CACNA1D);ENSOSIG00000010340(Cacna1c);ENSOSIG00000019577(Ank3)
GO:0061620	glycolytic process through glucose-6-phosphate	6	20	9.81356e-05	0.0169111	ENSOSIG00000002169(ENO3);ENSOSIG00000011836(gapdh);ENSOSIG00000012953(Aldoa);ENSOSIG00000014394(tpi1b);ENSOSIG00000022906(PGAM2);ENSOSIG00000023167(GPI)
GO:0030073	insulin secretion	20	193	0.000102277	0.0171212	ENSOSIG00000002428(KCNA5);ENSOSIG00000004013(Cacna1c);ENSOSIG00000004973(Brsk2);ENSOSIG00000005175(SFRP1);ENSOSIG00000005512(stxbp5l);ENSOSIG00000005600(rfx3);ENSOSIG00000007287(neurod1);ENSOSIG00000008074(SNX19);ENSOSIG00000008429(CACNA1D);ENSOSIG00000009804(gh);ENSOSIG00000010340(Cacna1c);ENSOSIG00000012300(SLC25A4);ENSOSIG00000016403(CACNA1E);ENSOSIG00000017561(DOC2B);ENSOSIG00000018150(Arntl)…
GO:0002920	regulation of humoral immune response	9	48	0.000106061	0.0172615	ENSOSIG00000000591(CPB2);ENSOSIG00000006595(c5ar1);ENSOSIG00000008525(CFHR2);ENSOSIG00000008589(F2);ENSOSIG00000010635(CFH);ENSOSIG00000013368(CFHR2);ENSOSIG00000014165(C8A);ENSOSIG00000016538(c9);ENSOSIG00000023590(ADAMTS15)
GO:0009127	purine nucleoside monophosphate biosynthetic process	13	96	0.000118321	0.0176557	ENSOSIG00000000219(ATP5MC3);ENSOSIG00000002169(ENO3);ENSOSIG00000004889(ldha);ENSOSIG00000007638(impdh1a);ENSOSIG00000008260(ak1);ENSOSIG00000009745(ATIC);ENSOSIG00000010088(AIRC);ENSOSIG00000011836(gapdh);ENSOSIG00000012953(Aldoa);ENSOSIG00000014394(tpi1b);ENSOSIG00000019268(apt);ENSOSIG00000022906(PGAM2);ENSOSIG00000023167(GPI)
GO:0009168	purine ribonucleoside monophosphate biosynthetic process	13	96	0.000118321	0.0176557	ENSOSIG00000000219(ATP5MC3);ENSOSIG00000002169(ENO3);ENSOSIG00000004889(ldha);ENSOSIG00000007638(impdh1a);ENSOSIG00000008260(ak1);ENSOSIG00000009745(ATIC);ENSOSIG00000010088(AIRC);ENSOSIG00000011836(gapdh);ENSOSIG00000012953(Aldoa);ENSOSIG00000014394(tpi1b);ENSOSIG00000019268(apt);ENSOSIG00000022906(PGAM2);ENSOSIG00000023167(GPI)
GO:0030048	actin filament-based movement	15	123	0.000122843	0.0176557	ENSOSIG00000000211(KCNH2);ENSOSIG00000001923(ANK3);ENSOSIG00000002428(KCNA5);ENSOSIG00000004013(Cacna1c);ENSOSIG00000004385(CAV3);ENSOSIG00000008429(CACNA1D);ENSOSIG00000008805(myl1);ENSOSIG00000010340(Cacna1c);ENSOSIG00000010848(MYBPC3);ENSOSIG00000011095(--);ENSOSIG00000012712(FXYD6);ENSOSIG00000015050(TNNC2);ENSOSIG00000018414(NEB);ENSOSIG00000018711(myrip);ENSOSIG00000019577(Ank3)
GO:0086009	membrane repolarization	8	39	0.000132378	0.0176557	ENSOSIG00000000211(KCNH2);ENSOSIG00000001923(ANK3);ENSOSIG00000002428(KCNA5);ENSOSIG00000004013(Cacna1c);ENSOSIG00000004385(CAV3);ENSOSIG00000008429(CACNA1D);ENSOSIG00000010340(Cacna1c);ENSOSIG00000019577(Ank3)
GO:0061615	glycolytic process through fructose-6-phosphate	6	21	0.000132746	0.0176557	ENSOSIG00000002169(ENO3);ENSOSIG00000011836(gapdh);ENSOSIG00000012953(Aldoa);ENSOSIG00000014394(tpi1b);ENSOSIG00000022906(PGAM2);ENSOSIG00000023167(GPI)
GO:0086005	ventricular cardiac muscle cell action potential	6	21	0.000132746	0.0176557	ENSOSIG00000000211(KCNH2);ENSOSIG00000001923(ANK3);ENSOSIG00000004013(Cacna1c);ENSOSIG00000004385(CAV3);ENSOSIG00000010340(Cacna1c);ENSOSIG00000019577(Ank3)
GO:0003015	heart process	23	245	0.000145162	0.0176557	ENSOSIG00000000211(KCNH2);ENSOSIG00000001212(CACNA1H);ENSOSIG00000001923(ANK3);ENSOSIG00000002428(KCNA5);ENSOSIG00000004013(Cacna1c);ENSOSIG00000004385(CAV3);ENSOSIG00000005373(CHRM2);ENSOSIG00000006508(SGCG);ENSOSIG00000006916(lrrc39);ENSOSIG00000008429(CACNA1D);ENSOSIG00000008805(myl1);ENSOSIG00000010340(Cacna1c);ENSOSIG00000010848(MYBPC3);ENSOSIG00000011282(SMYD2);ENSOSIG00000012712(FXYD6);ENS…
GO:0060401	cytosolic calcium ion transport	16	139	0.000147124	0.0176557	ENSOSIG00000001923(ANK3);ENSOSIG00000002596(ACBD7);ENSOSIG00000002917(METTL21C);ENSOSIG00000004013(Cacna1c);ENSOSIG00000008589(F2);ENSOSIG00000009442(METTL21C);ENSOSIG00000010340(Cacna1c);ENSOSIG00000010718(dhrs7ca);ENSOSIG00000013311(ATP2B1);ENSOSIG00000014319(stac3);ENSOSIG00000015495(ATP2B2);ENSOSIG00000018946(CASQ1);ENSOSIG00000019076(--);ENSOSIG00000019577(Ank3);ENSOSIG00000020175(wnt5b);ENS…
GO:0086014	atrial cardiac muscle cell action potential	5	14	0.0001523	0.0176557	ENSOSIG00000001923(ANK3);ENSOSIG00000002428(KCNA5);ENSOSIG00000004013(Cacna1c);ENSOSIG00000010340(Cacna1c);ENSOSIG00000019577(Ank3)
GO:0086026	atrial cardiac muscle cell to AV node cell signaling	5	14	0.0001523	0.0176557	ENSOSIG00000001923(ANK3);ENSOSIG00000002428(KCNA5);ENSOSIG00000004013(Cacna1c);ENSOSIG00000010340(Cacna1c);ENSOSIG00000019577(Ank3)
GO:0086066	atrial cardiac muscle cell to AV node cell communication	5	14	0.0001523	0.0176557	ENSOSIG00000001923(ANK3);ENSOSIG00000002428(KCNA5);ENSOSIG00000004013(Cacna1c);ENSOSIG00000010340(Cacna1c);ENSOSIG00000019577(Ank3)
GO:0051480	regulation of cytosolic calcium ion concentration	23	246	0.000154223	0.0176557	ENSOSIG00000000399(PLCB4);ENSOSIG00000001923(ANK3);ENSOSIG00000001931(Smpd3);ENSOSIG00000002428(KCNA5);ENSOSIG00000002596(ACBD7);ENSOSIG00000002917(METTL21C);ENSOSIG00000004013(Cacna1c);ENSOSIG00000004385(CAV3);ENSOSIG00000006595(c5ar1);ENSOSIG00000008589(F2);ENSOSIG00000009442(METTL21C);ENSOSIG00000010340(Cacna1c);ENSOSIG00000010718(dhrs7ca);ENSOSIG00000012712(FXYD6);ENSOSIG00000013311(ATP2B1);E…
GO:0003008	system process	96	1659	0.000154282	0.0176557	ENSOSIG00000000211(KCNH2);ENSOSIG00000000399(PLCB4);ENSOSIG00000000960(gatm);ENSOSIG00000001212(CACNA1H);ENSOSIG00000001923(ANK3);ENSOSIG00000001931(Smpd3);ENSOSIG00000002428(KCNA5);ENSOSIG00000002596(ACBD7);ENSOSIG00000003240(Csmd1);ENSOSIG00000003931(snx10b);ENSOSIG00000004013(Cacna1c);ENSOSIG00000004198(TMOD4);ENSOSIG00000004385(CAV3);ENSOSIG00000004792(ADH5);ENSOSIG00000005063(SFRP5);ENSOSIG0…
GO:0086015	SA node cell action potential	4	8	0.000158579	0.0176557	ENSOSIG00000001923(ANK3);ENSOSIG00000002428(KCNA5);ENSOSIG00000008429(CACNA1D);ENSOSIG00000019577(Ank3)
GO:0086018	SA node cell to atrial cardiac muscle cell signaling	4	8	0.000158579	0.0176557	ENSOSIG00000001923(ANK3);ENSOSIG00000002428(KCNA5);ENSOSIG00000008429(CACNA1D);ENSOSIG00000019577(Ank3)
GO:0086070	SA node cell to atrial cardiac muscle cell communication	4	8	0.000158579	0.0176557	ENSOSIG00000001923(ANK3);ENSOSIG00000002428(KCNA5);ENSOSIG00000008429(CACNA1D);ENSOSIG00000019577(Ank3)
GO:0006734	NADH metabolic process	8	40	0.000159712	0.0176557	ENSOSIG00000002169(ENO3);ENSOSIG00000004889(ldha);ENSOSIG00000011836(gapdh);ENSOSIG00000012953(Aldoa);ENSOSIG00000014394(tpi1b);ENSOSIG00000021714(SORD);ENSOSIG00000022906(PGAM2);ENSOSIG00000023167(GPI)
GO:0006936	muscle contraction	26	298	0.00018189	0.0197351	ENSOSIG00000000211(KCNH2);ENSOSIG00000001212(CACNA1H);ENSOSIG00000001923(ANK3);ENSOSIG00000001931(Smpd3);ENSOSIG00000002428(KCNA5);ENSOSIG00000004013(Cacna1c);ENSOSIG00000004198(TMOD4);ENSOSIG00000004385(CAV3);ENSOSIG00000005373(CHRM2);ENSOSIG00000008429(CACNA1D);ENSOSIG00000008805(myl1);ENSOSIG00000010340(Cacna1c);ENSOSIG00000010848(MYBPC3);ENSOSIG00000011095(--);ENSOSIG00000012712(FXYD6);ENSOSI…
GO:0035418	protein localization to synapse	8	41	0.000191524	0.0204026	ENSOSIG00000000399(PLCB4);ENSOSIG00000006533(Shank1);ENSOSIG00000007127(Arhgap44);ENSOSIG00000010602(RAPSN);ENSOSIG00000016475(STX1B);ENSOSIG00000018373(PCLO);ENSOSIG00000020370(Nrxn2);ENSOSIG00000021070(PCLO)
GO:0030072	peptide hormone secretion	22	236	0.000221918	0.0232182	ENSOSIG00000001931(Smpd3);ENSOSIG00000002428(KCNA5);ENSOSIG00000004013(Cacna1c);ENSOSIG00000004973(Brsk2);ENSOSIG00000005175(SFRP1);ENSOSIG00000005512(stxbp5l);ENSOSIG00000005600(rfx3);ENSOSIG00000007287(neurod1);ENSOSIG00000008074(SNX19);ENSOSIG00000008429(CACNA1D);ENSOSIG00000009804(gh);ENSOSIG00000010340(Cacna1c);ENSOSIG00000012300(SLC25A4);ENSOSIG00000015128(AQP1);ENSOSIG00000016403(CACNA1E);…
GO:0060047	heart contraction	22	237	0.000235614	0.0242187	ENSOSIG00000000211(KCNH2);ENSOSIG00000001212(CACNA1H);ENSOSIG00000001923(ANK3);ENSOSIG00000002428(KCNA5);ENSOSIG00000004013(Cacna1c);ENSOSIG00000004385(CAV3);ENSOSIG00000005373(CHRM2);ENSOSIG00000006508(SGCG);ENSOSIG00000006916(lrrc39);ENSOSIG00000008429(CACNA1D);ENSOSIG00000008805(myl1);ENSOSIG00000010340(Cacna1c);ENSOSIG00000010848(MYBPC3);ENSOSIG00000011282(SMYD2);ENSOSIG00000012712(FXYD6);ENS…
GO:0055074	calcium ion homeostasis	30	372	0.000241364	0.0243819	ENSOSIG00000000399(PLCB4);ENSOSIG00000001923(ANK3);ENSOSIG00000001931(Smpd3);ENSOSIG00000002428(KCNA5);ENSOSIG00000002596(ACBD7);ENSOSIG00000002917(METTL21C);ENSOSIG00000003931(snx10b);ENSOSIG00000004013(Cacna1c);ENSOSIG00000004385(CAV3);ENSOSIG00000006595(c5ar1);ENSOSIG00000008589(F2);ENSOSIG00000009442(METTL21C);ENSOSIG00000009804(gh);ENSOSIG00000010340(Cacna1c);ENSOSIG00000010718(dhrs7ca);ENSO…
GO:0048790	maintenance of presynaptic active zone structure	3	4	0.000250203	0.0248464	ENSOSIG00000000504(TENM2);ENSOSIG00000018373(PCLO);ENSOSIG00000021070(PCLO)
GO:0097553	calcium ion transmembrane import into cytosol	13	104	0.000267356	0.0249117	ENSOSIG00000001923(ANK3);ENSOSIG00000002596(ACBD7);ENSOSIG00000002917(METTL21C);ENSOSIG00000004013(Cacna1c);ENSOSIG00000008589(F2);ENSOSIG00000009442(METTL21C);ENSOSIG00000010340(Cacna1c);ENSOSIG00000010718(dhrs7ca);ENSOSIG00000014319(stac3);ENSOSIG00000018946(CASQ1);ENSOSIG00000019076(--);ENSOSIG00000019577(Ank3);ENSOSIG00000020175(wnt5b)
GO:0010522	regulation of calcium ion transport into cytosol	12	91	0.000276046	0.0249117	ENSOSIG00000001923(ANK3);ENSOSIG00000002596(ACBD7);ENSOSIG00000002917(METTL21C);ENSOSIG00000004013(Cacna1c);ENSOSIG00000008589(F2);ENSOSIG00000009442(METTL21C);ENSOSIG00000010340(Cacna1c);ENSOSIG00000010718(dhrs7ca);ENSOSIG00000014319(stac3);ENSOSIG00000018946(CASQ1);ENSOSIG00000019577(Ank3);ENSOSIG00000022107(P2RX5)
GO:0086016	AV node cell action potential	4	9	0.000276372	0.0249117	ENSOSIG00000001923(ANK3);ENSOSIG00000004013(Cacna1c);ENSOSIG00000010340(Cacna1c);ENSOSIG00000019577(Ank3)
GO:0086027	AV node cell to bundle of His cell signaling	4	9	0.000276372	0.0249117	ENSOSIG00000001923(ANK3);ENSOSIG00000004013(Cacna1c);ENSOSIG00000010340(Cacna1c);ENSOSIG00000019577(Ank3)
GO:0099558	maintenance of synapse structure	4	9	0.000276372	0.0249117	ENSOSIG00000000504(TENM2);ENSOSIG00000006533(Shank1);ENSOSIG00000018373(PCLO);ENSOSIG00000021070(PCLO)
GO:1990709	presynaptic active zone organization	4	9	0.000276372	0.0249117	ENSOSIG00000000504(TENM2);ENSOSIG00000015945(Tspoap1);ENSOSIG00000018373(PCLO);ENSOSIG00000021070(PCLO)
GO:0034765	regulation of ion transmembrane transport	30	376	0.000289737	0.0257207	ENSOSIG00000000211(KCNH2);ENSOSIG00000001212(CACNA1H);ENSOSIG00000001923(ANK3);ENSOSIG00000002428(KCNA5);ENSOSIG00000002596(ACBD7);ENSOSIG00000002917(METTL21C);ENSOSIG00000004013(Cacna1c);ENSOSIG00000004385(CAV3);ENSOSIG00000006533(Shank1);ENSOSIG00000008429(CACNA1D);ENSOSIG00000008589(F2);ENSOSIG00000009442(METTL21C);ENSOSIG00000009804(gh);ENSOSIG00000010340(Cacna1c);ENSOSIG00000010718(dhrs7ca);…
GO:0002526	acute inflammatory response	12	92	0.00030608	0.0265796	ENSOSIG00000000591(CPB2);ENSOSIG00000006595(c5ar1);ENSOSIG00000008525(CFHR2);ENSOSIG00000008589(F2);ENSOSIG00000010635(CFH);ENSOSIG00000013368(CFHR2);ENSOSIG00000014165(C8A);ENSOSIG00000016538(c9);ENSOSIG00000018425(ASH1L);ENSOSIG00000022574(tf);ENSOSIG00000023590(ADAMTS15);MSTRG.18161(CFI)
GO:0086001	cardiac muscle cell action potential	9	55	0.000313022	0.0265796	ENSOSIG00000000211(KCNH2);ENSOSIG00000001923(ANK3);ENSOSIG00000002428(KCNA5);ENSOSIG00000004013(Cacna1c);ENSOSIG00000004385(CAV3);ENSOSIG00000008429(CACNA1D);ENSOSIG00000010340(Cacna1c);ENSOSIG00000019577(Ank3);ENSOSIG00000021196(Ank3)
GO:0086003	cardiac muscle cell contraction	9	55	0.000313022	0.0265796	ENSOSIG00000000211(KCNH2);ENSOSIG00000001923(ANK3);ENSOSIG00000002428(KCNA5);ENSOSIG00000004013(Cacna1c);ENSOSIG00000004385(CAV3);ENSOSIG00000008429(CACNA1D);ENSOSIG00000010340(Cacna1c);ENSOSIG00000012712(FXYD6);ENSOSIG00000019577(Ank3)
GO:0086019	cell-cell signaling involved in cardiac conduction	6	25	0.000377677	0.0316116	ENSOSIG00000001923(ANK3);ENSOSIG00000002428(KCNA5);ENSOSIG00000004013(Cacna1c);ENSOSIG00000008429(CACNA1D);ENSOSIG00000010340(Cacna1c);ENSOSIG00000019577(Ank3)
GO:0060402	calcium ion transport into cytosol	14	122	0.000387228	0.0319545	ENSOSIG00000001923(ANK3);ENSOSIG00000002596(ACBD7);ENSOSIG00000002917(METTL21C);ENSOSIG00000004013(Cacna1c);ENSOSIG00000008589(F2);ENSOSIG00000009442(METTL21C);ENSOSIG00000010340(Cacna1c);ENSOSIG00000010718(dhrs7ca);ENSOSIG00000014319(stac3);ENSOSIG00000018946(CASQ1);ENSOSIG00000019076(--);ENSOSIG00000019577(Ank3);ENSOSIG00000020175(wnt5b);ENSOSIG00000022107(P2RX5)
GO:0072507	divalent inorganic cation homeostasis	31	401	0.000398961	0.0324655	ENSOSIG00000000399(PLCB4);ENSOSIG00000001923(ANK3);ENSOSIG00000001931(Smpd3);ENSOSIG00000002428(KCNA5);ENSOSIG00000002596(ACBD7);ENSOSIG00000002917(METTL21C);ENSOSIG00000003931(snx10b);ENSOSIG00000004013(Cacna1c);ENSOSIG00000004385(CAV3);ENSOSIG00000006595(c5ar1);ENSOSIG00000008589(F2);ENSOSIG00000009442(METTL21C);ENSOSIG00000009804(gh);ENSOSIG00000010340(Cacna1c);ENSOSIG00000010718(dhrs7ca);ENSO…
GO:0042866	pyruvate biosynthetic process	7	35	0.000411206	0.0330035	ENSOSIG00000002169(ENO3);ENSOSIG00000004889(ldha);ENSOSIG00000011836(gapdh);ENSOSIG00000012953(Aldoa);ENSOSIG00000014394(tpi1b);ENSOSIG00000022906(PGAM2);ENSOSIG00000023167(GPI)
GO:0070588	calcium ion transmembrane transport	22	247	0.000419164	0.0330274	ENSOSIG00000001212(CACNA1H);ENSOSIG00000001923(ANK3);ENSOSIG00000002596(ACBD7);ENSOSIG00000002917(METTL21C);ENSOSIG00000004013(Cacna1c);ENSOSIG00000004385(CAV3);ENSOSIG00000008429(CACNA1D);ENSOSIG00000008589(F2);ENSOSIG00000009442(METTL21C);ENSOSIG00000010340(Cacna1c);ENSOSIG00000010718(dhrs7ca);ENSOSIG00000013311(ATP2B1);ENSOSIG00000014319(stac3);ENSOSIG00000015495(ATP2B2);ENSOSIG00000015858(ANX…
GO:0061337	cardiac conduction	11	82	0.000422777	0.0330274	ENSOSIG00000000211(KCNH2);ENSOSIG00000001923(ANK3);ENSOSIG00000002428(KCNA5);ENSOSIG00000004013(Cacna1c);ENSOSIG00000008429(CACNA1D);ENSOSIG00000010340(Cacna1c);ENSOSIG00000013311(ATP2B1);ENSOSIG00000015495(ATP2B2);ENSOSIG00000018946(CASQ1);ENSOSIG00000019577(Ank3);ENSOSIG00000024024(kcnk9)
GO:0086067	AV node cell to bundle of His cell communication	4	10	0.000446001	0.0343832	ENSOSIG00000001923(ANK3);ENSOSIG00000004013(Cacna1c);ENSOSIG00000010340(Cacna1c);ENSOSIG00000019577(Ank3)
GO:0003012	muscle system process	31	404	0.000452818	0.0344554	ENSOSIG00000000211(KCNH2);ENSOSIG00000000960(gatm);ENSOSIG00000001212(CACNA1H);ENSOSIG00000001923(ANK3);ENSOSIG00000001931(Smpd3);ENSOSIG00000002428(KCNA5);ENSOSIG00000004013(Cacna1c);ENSOSIG00000004198(TMOD4);ENSOSIG00000004385(CAV3);ENSOSIG00000005373(CHRM2);ENSOSIG00000007631(MYOG);ENSOSIG00000008429(CACNA1D);ENSOSIG00000008805(myl1);ENSOSIG00000010340(Cacna1c);ENSOSIG00000010848(MYBPC3);ENSOS…
GO:0010817	regulation of hormone levels	35	477	0.000458933	0.034473	ENSOSIG00000000399(PLCB4);ENSOSIG00000001212(CACNA1H);ENSOSIG00000001931(Smpd3);ENSOSIG00000002428(KCNA5);ENSOSIG00000004013(Cacna1c);ENSOSIG00000004973(Brsk2);ENSOSIG00000005175(SFRP1);ENSOSIG00000005512(stxbp5l);ENSOSIG00000005600(rfx3);ENSOSIG00000007287(neurod1);ENSOSIG00000007754(ENPEP);ENSOSIG00000008074(SNX19);ENSOSIG00000008429(CACNA1D);ENSOSIG00000008558(ANXA1);ENSOSIG00000009804(gh);ENS…
GO:0099622	cardiac muscle cell membrane repolarization	6	26	0.000474451	0.0351853	ENSOSIG00000000211(KCNH2);ENSOSIG00000001923(ANK3);ENSOSIG00000002428(KCNA5);ENSOSIG00000004385(CAV3);ENSOSIG00000008429(CACNA1D);ENSOSIG00000019577(Ank3)
GO:0098742	cell-cell adhesion via plasma-membrane adhesion molecules	21	233	0.000480428	0.0351853	ENSOSIG00000000154(CadN);ENSOSIG00000000245(PCDH10);ENSOSIG00000000504(TENM2);ENSOSIG00000004489(Celsr3);ENSOSIG00000004807(CadN);ENSOSIG00000005004(UNC5D);ENSOSIG00000005672(MMP24);ENSOSIG00000005916(Clstn2);ENSOSIG00000006212(CadN);ENSOSIG00000006874(CDH15);ENSOSIG00000009502(CELSR3);ENSOSIG00000011626(FAT3);ENSOSIG00000013132(CDH24);ENSOSIG00000014198(Tenm1);ENSOSIG00000014719(PCDH1);ENSOSIG00…
GO:0007267	cell-cell signaling	84	1460	0.00049172	0.0355678	ENSOSIG00000000399(PLCB4);ENSOSIG00000000504(TENM2);ENSOSIG00000001923(ANK3);ENSOSIG00000001931(Smpd3);ENSOSIG00000002428(KCNA5);ENSOSIG00000002596(ACBD7);ENSOSIG00000003425(--);ENSOSIG00000004013(Cacna1c);ENSOSIG00000004489(Celsr3);ENSOSIG00000004973(Brsk2);ENSOSIG00000004989(Cspg5);ENSOSIG00000005063(SFRP5);ENSOSIG00000005175(SFRP1);ENSOSIG00000005373(CHRM2);ENSOSIG00000005512(stxbp5l);ENSOSIG0…
GO:1903317	regulation of protein maturation	11	85	0.000577851	0.0412882	ENSOSIG00000000591(CPB2);ENSOSIG00000006595(c5ar1);ENSOSIG00000008525(CFHR2);ENSOSIG00000008589(F2);ENSOSIG00000009804(gh);ENSOSIG00000010635(CFH);ENSOSIG00000013368(CFHR2);ENSOSIG00000014165(C8A);ENSOSIG00000016538(c9);ENSOSIG00000022993(Sox4);ENSOSIG00000023590(ADAMTS15)
GO:0032012	regulation of ARF protein signal transduction	6	27	0.000589489	0.0416122	ENSOSIG00000013964(IQSEC3);ENSOSIG00000015587(IQSEC3);ENSOSIG00000017315(ARFGEF3);ENSOSIG00000017819(Iqsec2);ENSOSIG00000020167(IQSEC3);ENSOSIG00000021370(Iqsec2)
GO:0046879	hormone secretion	25	305	0.000611085	0.0426232	ENSOSIG00000000399(PLCB4);ENSOSIG00000001931(Smpd3);ENSOSIG00000002428(KCNA5);ENSOSIG00000004013(Cacna1c);ENSOSIG00000004973(Brsk2);ENSOSIG00000005175(SFRP1);ENSOSIG00000005512(stxbp5l);ENSOSIG00000005600(rfx3);ENSOSIG00000007287(neurod1);ENSOSIG00000008074(SNX19);ENSOSIG00000008429(CACNA1D);ENSOSIG00000008558(ANXA1);ENSOSIG00000009804(gh);ENSOSIG00000010340(Cacna1c);ENSOSIG00000012300(SLC25A4);E…
GO:0009124	nucleoside monophosphate biosynthetic process	15	143	0.000639668	0.0440919	ENSOSIG00000000219(ATP5MC3);ENSOSIG00000002169(ENO3);ENSOSIG00000002197(TK1);ENSOSIG00000004889(ldha);ENSOSIG00000005895(FMO5);ENSOSIG00000007638(impdh1a);ENSOSIG00000008260(ak1);ENSOSIG00000009745(ATIC);ENSOSIG00000010088(AIRC);ENSOSIG00000011836(gapdh);ENSOSIG00000012953(Aldoa);ENSOSIG00000014394(tpi1b);ENSOSIG00000019268(apt);ENSOSIG00000022906(PGAM2);ENSOSIG00000023167(GPI)
GO:0099536	synaptic signaling	43	641	0.00071777	0.0482729	ENSOSIG00000000399(PLCB4);ENSOSIG00000000504(TENM2);ENSOSIG00000002596(ACBD7);ENSOSIG00000004013(Cacna1c);ENSOSIG00000004989(Cspg5);ENSOSIG00000005373(CHRM2);ENSOSIG00000006533(Shank1);ENSOSIG00000007288(ACHE);ENSOSIG00000009092(Snph);ENSOSIG00000009380(npas4a);ENSOSIG00000010340(Cacna1c);ENSOSIG00000010602(RAPSN);ENSOSIG00000011197(KCND1);ENSOSIG00000012207(Gria4);ENSOSIG00000012828(GAD2);ENSOSI…
GO:0032011	ARF protein signal transduction	6	28	0.000725041	0.0482729	ENSOSIG00000013964(IQSEC3);ENSOSIG00000015587(IQSEC3);ENSOSIG00000017315(ARFGEF3);ENSOSIG00000017819(Iqsec2);ENSOSIG00000020167(IQSEC3);ENSOSIG00000021370(Iqsec2)
GO:0098901	regulation of cardiac muscle cell action potential	6	28	0.000725041	0.0482729	ENSOSIG00000001923(ANK3);ENSOSIG00000004013(Cacna1c);ENSOSIG00000004385(CAV3);ENSOSIG00000010340(Cacna1c);ENSOSIG00000019577(Ank3);ENSOSIG00000021196(Ank3)
Cellular Component
GO ID	Description	Control-vs-BPF2000 (640)	All (15955)	pvalue	p.adjust	Genes
GO:0030017	sarcomere	36	226	1.2163e-12	8.58708e-10	ENSOSIG00000001069(MYOZ1);ENSOSIG00000001923(ANK3);ENSOSIG00000002428(KCNA5);ENSOSIG00000004013(Cacna1c);ENSOSIG00000004198(TMOD4);ENSOSIG00000004385(CAV3);ENSOSIG00000005528(PDLIM3);ENSOSIG00000006916(lrrc39);ENSOSIG00000007616(rpl15);ENSOSIG00000008260(ak1);ENSOSIG00000008429(CACNA1D);ENSOSIG00000008616(pdlim7);ENSOSIG00000008805(myl1);ENSOSIG00000009699(TNNT3);ENSOSIG00000009722(TNNI2);ENSOSIG…
GO:0043292	contractile fiber	38	261	4.91372e-12	1.46568e-09	ENSOSIG00000001069(MYOZ1);ENSOSIG00000001923(ANK3);ENSOSIG00000002428(KCNA5);ENSOSIG00000002596(ACBD7);ENSOSIG00000004013(Cacna1c);ENSOSIG00000004198(TMOD4);ENSOSIG00000004385(CAV3);ENSOSIG00000005528(PDLIM3);ENSOSIG00000006916(lrrc39);ENSOSIG00000007616(rpl15);ENSOSIG00000008260(ak1);ENSOSIG00000008429(CACNA1D);ENSOSIG00000008616(pdlim7);ENSOSIG00000008805(myl1);ENSOSIG00000009699(TNNT3);ENSOSIG…
GO:0005615	extracellular space	79	871	6.22809e-12	1.46568e-09	ENSOSIG00000000591(CPB2);ENSOSIG00000000605(IL17D);ENSOSIG00000002596(ACBD7);ENSOSIG00000003425(--);ENSOSIG00000003742(MTCL1);ENSOSIG00000005063(SFRP5);ENSOSIG00000005133(NME2);ENSOSIG00000005175(SFRP1);ENSOSIG00000005499(PLBD1);ENSOSIG00000005940(CP);ENSOSIG00000006019(c3);ENSOSIG00000006099(c3);ENSOSIG00000006103(c3);ENSOSIG00000006253(WNT9B);ENSOSIG00000006282(c3);ENSOSIG00000006318(c3);ENSOSI…
GO:0030016	myofibril	36	247	1.75358e-11	3.09508e-09	ENSOSIG00000001069(MYOZ1);ENSOSIG00000001923(ANK3);ENSOSIG00000002428(KCNA5);ENSOSIG00000004013(Cacna1c);ENSOSIG00000004198(TMOD4);ENSOSIG00000004385(CAV3);ENSOSIG00000005528(PDLIM3);ENSOSIG00000006916(lrrc39);ENSOSIG00000007616(rpl15);ENSOSIG00000008260(ak1);ENSOSIG00000008429(CACNA1D);ENSOSIG00000008616(pdlim7);ENSOSIG00000008805(myl1);ENSOSIG00000009699(TNNT3);ENSOSIG00000009722(TNNI2);ENSOSIG…
GO:0005576	extracellular region	132	1889	6.37736e-11	9.00483e-09	ENSOSIG00000000087(ESD);ENSOSIG00000000504(TENM2);ENSOSIG00000000591(CPB2);ENSOSIG00000000605(IL17D);ENSOSIG00000000871(GPX7);ENSOSIG00000001056(Cavin1);ENSOSIG00000002140(Plg);ENSOSIG00000002596(ACBD7);ENSOSIG00000003140(SLITRK1);ENSOSIG00000003425(--);ENSOSIG00000003732(PON2);ENSOSIG00000003742(MTCL1);ENSOSIG00000003982(Ehd2);ENSOSIG00000004114(COL9A1);ENSOSIG00000004144(epd2);ENSOSIG0000000498…
GO:0031674	I band	21	146	3.71868e-07	4.37565e-05	ENSOSIG00000001069(MYOZ1);ENSOSIG00000001923(ANK3);ENSOSIG00000002428(KCNA5);ENSOSIG00000004013(Cacna1c);ENSOSIG00000004385(CAV3);ENSOSIG00000005528(PDLIM3);ENSOSIG00000008429(CACNA1D);ENSOSIG00000008616(pdlim7);ENSOSIG00000010340(Cacna1c);ENSOSIG00000010848(MYBPC3);ENSOSIG00000010936(Scn8a);ENSOSIG00000012385(sphkap);ENSOSIG00000012953(Aldoa);ENSOSIG00000013956(MIB2);ENSOSIG00000018414(NEB);ENSO…
GO:0048786	presynaptic active zone	10	38	1.71714e-06	0.00014456	ENSOSIG00000005522(Ppfia2);ENSOSIG00000006650(ERC2);ENSOSIG00000007127(Arhgap44);ENSOSIG00000014173(Rims1);ENSOSIG00000015945(Tspoap1);ENSOSIG00000016475(STX1B);ENSOSIG00000018373(PCLO);ENSOSIG00000019019(WDFY3);ENSOSIG00000021070(PCLO);ENSOSIG00000023146(Rims2)
GO:0036379	myofilament	12	56	1.73042e-06	0.00014456	ENSOSIG00000004198(TMOD4);ENSOSIG00000009699(TNNT3);ENSOSIG00000009722(TNNI2);ENSOSIG00000009747(TNNI2);ENSOSIG00000010848(MYBPC3);ENSOSIG00000011095(--);ENSOSIG00000013825(Tnni1);ENSOSIG00000015050(TNNC2);ENSOSIG00000016731(Tnni1);ENSOSIG00000016739(TNNT2);ENSOSIG00000018723(--);ENSOSIG00000023213(TNNT2)
GO:0005861	troponin complex	8	23	1.84283e-06	0.00014456	ENSOSIG00000009699(TNNT3);ENSOSIG00000009722(TNNI2);ENSOSIG00000009747(TNNI2);ENSOSIG00000013825(Tnni1);ENSOSIG00000015050(TNNC2);ENSOSIG00000016731(Tnni1);ENSOSIG00000016739(TNNT2);ENSOSIG00000023213(TNNT2)
GO:0030018	Z disc	18	125	2.47426e-06	0.000174683	ENSOSIG00000001069(MYOZ1);ENSOSIG00000001923(ANK3);ENSOSIG00000002428(KCNA5);ENSOSIG00000004013(Cacna1c);ENSOSIG00000004385(CAV3);ENSOSIG00000005528(PDLIM3);ENSOSIG00000008429(CACNA1D);ENSOSIG00000008616(pdlim7);ENSOSIG00000010340(Cacna1c);ENSOSIG00000010848(MYBPC3);ENSOSIG00000010936(Scn8a);ENSOSIG00000012385(sphkap);ENSOSIG00000013956(MIB2);ENSOSIG00000018414(NEB);ENSOSIG00000019577(Ank3);ENSOS…
GO:0045202	synapse	64	893	4.34002e-06	0.00027855	ENSOSIG00000000399(PLCB4);ENSOSIG00000000504(TENM2);ENSOSIG00000001923(ANK3);ENSOSIG00000002596(ACBD7);ENSOSIG00000003140(SLITRK1);ENSOSIG00000004013(Cacna1c);ENSOSIG00000004385(CAV3);ENSOSIG00000005168(PRRT1);ENSOSIG00000005373(CHRM2);ENSOSIG00000005522(Ppfia2);ENSOSIG00000006533(Shank1);ENSOSIG00000006650(ERC2);ENSOSIG00000006836(BSN);ENSOSIG00000006874(CDH15);ENSOSIG00000007127(Arhgap44);ENSOS…
GO:0060077	inhibitory synapse	7	19	5.34456e-06	0.000290496	ENSOSIG00000012828(GAD2);ENSOSIG00000014173(Rims1);ENSOSIG00000015587(IQSEC3);ENSOSIG00000018373(PCLO);ENSOSIG00000020167(IQSEC3);ENSOSIG00000021070(PCLO);ENSOSIG00000023146(Rims2)
GO:0005865	striated muscle thin filament	11	52	5.34908e-06	0.000290496	ENSOSIG00000004198(TMOD4);ENSOSIG00000009699(TNNT3);ENSOSIG00000009722(TNNI2);ENSOSIG00000009747(TNNI2);ENSOSIG00000011095(--);ENSOSIG00000013825(Tnni1);ENSOSIG00000015050(TNNC2);ENSOSIG00000016731(Tnni1);ENSOSIG00000016739(TNNT2);ENSOSIG00000018723(--);ENSOSIG00000023213(TNNT2)
GO:0005886	plasma membrane	205	3924	8.68155e-06	0.000437798	ENSOSIG00000000029(Fabp3);ENSOSIG00000000211(KCNH2);ENSOSIG00000000219(ATP5MC3);ENSOSIG00000000399(PLCB4);ENSOSIG00000000504(TENM2);ENSOSIG00000001212(CACNA1H);ENSOSIG00000001322(STEAP2);ENSOSIG00000001923(ANK3);ENSOSIG00000001931(Smpd3);ENSOSIG00000002169(ENO3);ENSOSIG00000002428(KCNA5);ENSOSIG00000002596(ACBD7);ENSOSIG00000002822(CNNM1);ENSOSIG00000003060(PYURF);ENSOSIG00000003140(SLITRK1);ENSO…
GO:0034703	cation channel complex	20	165	1.03059e-05	0.000485064	ENSOSIG00000000211(KCNH2);ENSOSIG00000001212(CACNA1H);ENSOSIG00000002428(KCNA5);ENSOSIG00000004013(Cacna1c);ENSOSIG00000006533(Shank1);ENSOSIG00000008348(Scn4a);ENSOSIG00000008429(CACNA1D);ENSOSIG00000010340(Cacna1c);ENSOSIG00000010936(Scn8a);ENSOSIG00000011197(KCND1);ENSOSIG00000012207(Gria4);ENSOSIG00000014319(stac3);ENSOSIG00000015858(ANXA6);ENSOSIG00000016083(Trpc5);ENSOSIG00000016267(pdzrn3b…
GO:0048788	cytoskeleton of presynaptic active zone	4	5	1.24196e-05	0.00051578	ENSOSIG00000014173(Rims1);ENSOSIG00000015945(Tspoap1);ENSOSIG00000018373(PCLO);ENSOSIG00000021070(PCLO)
GO:0098831	presynaptic active zone cytoplasmic component	4	5	1.24196e-05	0.00051578	ENSOSIG00000014173(Rims1);ENSOSIG00000015945(Tspoap1);ENSOSIG00000018373(PCLO);ENSOSIG00000021070(PCLO)
GO:0030315	T-tubule	10	47	1.35734e-05	0.000532381	ENSOSIG00000001923(ANK3);ENSOSIG00000004013(Cacna1c);ENSOSIG00000004385(CAV3);ENSOSIG00000008429(CACNA1D);ENSOSIG00000010340(Cacna1c);ENSOSIG00000012712(FXYD6);ENSOSIG00000018946(CASQ1);ENSOSIG00000019577(Ank3);ENSOSIG00000021196(Ank3);ENSOSIG00000021713(TGFB3)
GO:0030288	outer membrane-bounded periplasmic space	20	174	2.2704e-05	0.000843634	ENSOSIG00000005001(Mast1);ENSOSIG00000005174(MAGI2);ENSOSIG00000005528(PDLIM3);ENSOSIG00000005944(dhdh);ENSOSIG00000006533(Shank1);ENSOSIG00000006946(EML6);ENSOSIG00000008616(pdlim7);ENSOSIG00000011675(Shank1);ENSOSIG00000011836(gapdh);ENSOSIG00000015180(Ptpn13);ENSOSIG00000016938(Grid2ip);ENSOSIG00000017057(Mast4);ENSOSIG00000017890(Magi1);ENSOSIG00000019656(TJP1);ENSOSIG00000020258(Whrn);ENSOSI…
GO:0071944	cell periphery	220	4349	3.2236e-05	0.00113793	ENSOSIG00000000029(Fabp3);ENSOSIG00000000211(KCNH2);ENSOSIG00000000219(ATP5MC3);ENSOSIG00000000399(PLCB4);ENSOSIG00000000504(TENM2);ENSOSIG00000001212(CACNA1H);ENSOSIG00000001322(STEAP2);ENSOSIG00000001923(ANK3);ENSOSIG00000001931(Smpd3);ENSOSIG00000002169(ENO3);ENSOSIG00000002428(KCNA5);ENSOSIG00000002596(ACBD7);ENSOSIG00000002822(CNNM1);ENSOSIG00000003060(PYURF);ENSOSIG00000003140(SLITRK1);ENSO…
GO:0099569	presynaptic cytoskeleton	4	6	3.6072e-05	0.0012127	ENSOSIG00000014173(Rims1);ENSOSIG00000015945(Tspoap1);ENSOSIG00000018373(PCLO);ENSOSIG00000021070(PCLO)
GO:0043194	axon initial segment	5	11	3.86207e-05	0.00123937	ENSOSIG00000010936(Scn8a);ENSOSIG00000016510(LRRC7);ENSOSIG00000017772(KCNQ3);ENSOSIG00000021196(Ank3);ENSOSIG00000023836(NFASC)
GO:0097060	synaptic membrane	28	307	4.62742e-05	0.00142042	ENSOSIG00000000504(TENM2);ENSOSIG00000001923(ANK3);ENSOSIG00000004013(Cacna1c);ENSOSIG00000005373(CHRM2);ENSOSIG00000006533(Shank1);ENSOSIG00000006650(ERC2);ENSOSIG00000008324(dlgap1);ENSOSIG00000009092(Snph);ENSOSIG00000010340(Cacna1c);ENSOSIG00000010602(RAPSN);ENSOSIG00000012207(Gria4);ENSOSIG00000012828(GAD2);ENSOSIG00000013311(ATP2B1);ENSOSIG00000014173(Rims1);ENSOSIG00000015587(IQSEC3);ENSOS…
GO:0099572	postsynaptic specialization	23	230	5.37891e-05	0.00154161	ENSOSIG00000000399(PLCB4);ENSOSIG00000001923(ANK3);ENSOSIG00000004013(Cacna1c);ENSOSIG00000006533(Shank1);ENSOSIG00000006650(ERC2);ENSOSIG00000007127(Arhgap44);ENSOSIG00000008324(dlgap1);ENSOSIG00000010340(Cacna1c);ENSOSIG00000010602(RAPSN);ENSOSIG00000010962(MAP4);ENSOSIG00000012207(Gria4);ENSOSIG00000013406(Cdk5r1);ENSOSIG00000014173(Rims1);ENSOSIG00000015765(CPEB3);ENSOSIG00000016510(LRRC7);EN…
GO:0005891	voltage-gated calcium channel complex	7	26	5.45897e-05	0.00154161	ENSOSIG00000001212(CACNA1H);ENSOSIG00000004013(Cacna1c);ENSOSIG00000008429(CACNA1D);ENSOSIG00000010340(Cacna1c);ENSOSIG00000014319(stac3);ENSOSIG00000016267(pdzrn3b);ENSOSIG00000016403(CACNA1E)
GO:0032279	asymmetric synapse	23	232	6.15158e-05	0.00161225	ENSOSIG00000000399(PLCB4);ENSOSIG00000001923(ANK3);ENSOSIG00000004013(Cacna1c);ENSOSIG00000005373(CHRM2);ENSOSIG00000006533(Shank1);ENSOSIG00000006650(ERC2);ENSOSIG00000007127(Arhgap44);ENSOSIG00000008324(dlgap1);ENSOSIG00000010340(Cacna1c);ENSOSIG00000010962(MAP4);ENSOSIG00000012207(Gria4);ENSOSIG00000013406(Cdk5r1);ENSOSIG00000014173(Rims1);ENSOSIG00000015765(CPEB3);ENSOSIG00000016510(LRRC7);EN…
GO:0034704	calcium channel complex	9	45	6.16583e-05	0.00161225	ENSOSIG00000001212(CACNA1H);ENSOSIG00000004013(Cacna1c);ENSOSIG00000008429(CACNA1D);ENSOSIG00000010340(Cacna1c);ENSOSIG00000014319(stac3);ENSOSIG00000015858(ANXA6);ENSOSIG00000016083(Trpc5);ENSOSIG00000016267(pdzrn3b);ENSOSIG00000016403(CACNA1E)
GO:0098984	neuron to neuron synapse	23	233	6.57396e-05	0.00165758	ENSOSIG00000000399(PLCB4);ENSOSIG00000001923(ANK3);ENSOSIG00000004013(Cacna1c);ENSOSIG00000005373(CHRM2);ENSOSIG00000006533(Shank1);ENSOSIG00000006650(ERC2);ENSOSIG00000007127(Arhgap44);ENSOSIG00000008324(dlgap1);ENSOSIG00000010340(Cacna1c);ENSOSIG00000010962(MAP4);ENSOSIG00000012207(Gria4);ENSOSIG00000013406(Cdk5r1);ENSOSIG00000014173(Rims1);ENSOSIG00000015765(CPEB3);ENSOSIG00000016510(LRRC7);EN…
GO:0042597	periplasmic space	20	193	9.95568e-05	0.00242369	ENSOSIG00000005001(Mast1);ENSOSIG00000005174(MAGI2);ENSOSIG00000005528(PDLIM3);ENSOSIG00000005944(dhdh);ENSOSIG00000006533(Shank1);ENSOSIG00000006946(EML6);ENSOSIG00000008616(pdlim7);ENSOSIG00000011675(Shank1);ENSOSIG00000011836(gapdh);ENSOSIG00000015180(Ptpn13);ENSOSIG00000016938(Grid2ip);ENSOSIG00000017057(Mast4);ENSOSIG00000017890(Magi1);ENSOSIG00000019656(TJP1);ENSOSIG00000020258(Whrn);ENSOSI…
GO:0031226	intrinsic component of plasma membrane	83	1382	0.000120973	0.00284585	ENSOSIG00000000029(Fabp3);ENSOSIG00000000211(KCNH2);ENSOSIG00000000504(TENM2);ENSOSIG00000001212(CACNA1H);ENSOSIG00000001322(STEAP2);ENSOSIG00000001923(ANK3);ENSOSIG00000002428(KCNA5);ENSOSIG00000003425(--);ENSOSIG00000003772(Adgrb2);ENSOSIG00000004013(Cacna1c);ENSOSIG00000004284(Camta1);ENSOSIG00000004541(--);ENSOSIG00000004989(Cspg5);ENSOSIG00000005279(PLPPR4);ENSOSIG00000005373(CHRM2);ENSOSIG0…
GO:0031233	intrinsic component of external side of plasma membrane	8	39	0.000131015	0.00284585	ENSOSIG00000000029(Fabp3);ENSOSIG00000005944(dhdh);ENSOSIG00000009825(F10);ENSOSIG00000014578(IGFN1);ENSOSIG00000016739(TNNT2);ENSOSIG00000019428(ECM2);ENSOSIG00000022574(tf);ENSOSIG00000023213(TNNT2)
GO:0014069	postsynaptic density	22	228	0.000131398	0.00284585	ENSOSIG00000000399(PLCB4);ENSOSIG00000001923(ANK3);ENSOSIG00000004013(Cacna1c);ENSOSIG00000006533(Shank1);ENSOSIG00000006650(ERC2);ENSOSIG00000007127(Arhgap44);ENSOSIG00000008324(dlgap1);ENSOSIG00000010340(Cacna1c);ENSOSIG00000010962(MAP4);ENSOSIG00000012207(Gria4);ENSOSIG00000013406(Cdk5r1);ENSOSIG00000014173(Rims1);ENSOSIG00000015765(CPEB3);ENSOSIG00000016510(LRRC7);ENSOSIG00000016629(ADGRL1);E…
GO:0098794	postsynapse	34	430	0.000133021	0.00284585	ENSOSIG00000000399(PLCB4);ENSOSIG00000000504(TENM2);ENSOSIG00000001923(ANK3);ENSOSIG00000004013(Cacna1c);ENSOSIG00000005373(CHRM2);ENSOSIG00000006533(Shank1);ENSOSIG00000006650(ERC2);ENSOSIG00000007127(Arhgap44);ENSOSIG00000008324(dlgap1);ENSOSIG00000009380(npas4a);ENSOSIG00000010340(Cacna1c);ENSOSIG00000010602(RAPSN);ENSOSIG00000010962(MAP4);ENSOSIG00000012207(Gria4);ENSOSIG00000013311(ATP2B1);E…
GO:0099512	supramolecular fiber	50	737	0.00019521	0.00405349	ENSOSIG00000001069(MYOZ1);ENSOSIG00000001923(ANK3);ENSOSIG00000002428(KCNA5);ENSOSIG00000002596(ACBD7);ENSOSIG00000004013(Cacna1c);ENSOSIG00000004198(TMOD4);ENSOSIG00000004385(CAV3);ENSOSIG00000005133(NME2);ENSOSIG00000005528(PDLIM3);ENSOSIG00000006916(lrrc39);ENSOSIG00000007616(rpl15);ENSOSIG00000007995(des);ENSOSIG00000008011(LD);ENSOSIG00000008260(ak1);ENSOSIG00000008429(CACNA1D);ENSOSIG000000…
GO:0099081	supramolecular polymer	50	741	0.00022197	0.00447746	ENSOSIG00000001069(MYOZ1);ENSOSIG00000001923(ANK3);ENSOSIG00000002428(KCNA5);ENSOSIG00000002596(ACBD7);ENSOSIG00000004013(Cacna1c);ENSOSIG00000004198(TMOD4);ENSOSIG00000004385(CAV3);ENSOSIG00000005133(NME2);ENSOSIG00000005528(PDLIM3);ENSOSIG00000006916(lrrc39);ENSOSIG00000007616(rpl15);ENSOSIG00000007995(des);ENSOSIG00000008011(LD);ENSOSIG00000008260(ak1);ENSOSIG00000008429(CACNA1D);ENSOSIG000000…
GO:0030313	cell envelope	22	238	0.000243162	0.00476868	ENSOSIG00000005001(Mast1);ENSOSIG00000005174(MAGI2);ENSOSIG00000005528(PDLIM3);ENSOSIG00000005944(dhdh);ENSOSIG00000006318(c3);ENSOSIG00000006533(Shank1);ENSOSIG00000006946(EML6);ENSOSIG00000008616(pdlim7);ENSOSIG00000011675(Shank1);ENSOSIG00000011836(gapdh);ENSOSIG00000015180(Ptpn13);ENSOSIG00000016938(Grid2ip);ENSOSIG00000017057(Mast4);ENSOSIG00000017890(Magi1);ENSOSIG00000019656(TJP1);ENSOSIG0…
GO:0031594	neuromuscular junction	12	91	0.0002719	0.00518815	ENSOSIG00000000504(TENM2);ENSOSIG00000004385(CAV3);ENSOSIG00000006874(CDH15);ENSOSIG00000010602(RAPSN);ENSOSIG00000013406(Cdk5r1);ENSOSIG00000015437(KCNN3);ENSOSIG00000017297(grip2);ENSOSIG00000018373(PCLO);ENSOSIG00000019019(WDFY3);ENSOSIG00000021070(PCLO);ENSOSIG00000021196(Ank3);ENSOSIG00000023605(Postn)
GO:0031237	intrinsic component of periplasmic side of plasma membrane	5	16	0.000308862	0.0055912	ENSOSIG00000000029(Fabp3);ENSOSIG00000014578(IGFN1);ENSOSIG00000016739(TNNT2);ENSOSIG00000019428(ECM2);ENSOSIG00000023213(TNNT2)
GO:0098567	periplasmic side of plasma membrane	5	16	0.000308862	0.0055912	ENSOSIG00000000029(Fabp3);ENSOSIG00000014578(IGFN1);ENSOSIG00000016739(TNNT2);ENSOSIG00000019428(ECM2);ENSOSIG00000023213(TNNT2)
GO:0042383	sarcolemma	15	135	0.000339371	0.00598991	ENSOSIG00000001212(CACNA1H);ENSOSIG00000001923(ANK3);ENSOSIG00000004013(Cacna1c);ENSOSIG00000004385(CAV3);ENSOSIG00000006508(SGCG);ENSOSIG00000008429(CACNA1D);ENSOSIG00000010340(Cacna1c);ENSOSIG00000012712(FXYD6);ENSOSIG00000014319(stac3);ENSOSIG00000015128(AQP1);ENSOSIG00000015858(ANXA6);ENSOSIG00000018946(CASQ1);ENSOSIG00000019577(Ank3);ENSOSIG00000021196(Ank3);ENSOSIG00000021713(TGFB3)
GO:0030054	cell junction	81	1399	0.000466694	0.00803624	ENSOSIG00000000399(PLCB4);ENSOSIG00000000504(TENM2);ENSOSIG00000001923(ANK3);ENSOSIG00000002428(KCNA5);ENSOSIG00000002596(ACBD7);ENSOSIG00000003140(SLITRK1);ENSOSIG00000004013(Cacna1c);ENSOSIG00000004385(CAV3);ENSOSIG00000004541(--);ENSOSIG00000005168(PRRT1);ENSOSIG00000005373(CHRM2);ENSOSIG00000005522(Ppfia2);ENSOSIG00000005528(PDLIM3);ENSOSIG00000006218(NEURL2);ENSOSIG00000006533(Shank1);ENSOSI…
GO:1990454	L-type voltage-gated calcium channel complex	3	5	0.000604656	0.010164	ENSOSIG00000004013(Cacna1c);ENSOSIG00000008429(CACNA1D);ENSOSIG00000010340(Cacna1c)
GO:0098590	plasma membrane region	61	996	0.000619238	0.010167	ENSOSIG00000000504(TENM2);ENSOSIG00000001212(CACNA1H);ENSOSIG00000001923(ANK3);ENSOSIG00000002428(KCNA5);ENSOSIG00000003742(MTCL1);ENSOSIG00000003982(Ehd2);ENSOSIG00000004013(Cacna1c);ENSOSIG00000004385(CAV3);ENSOSIG00000004541(--);ENSOSIG00000005133(NME2);ENSOSIG00000005373(CHRM2);ENSOSIG00000006533(Shank1);ENSOSIG00000006595(c5ar1);ENSOSIG00000006650(ERC2);ENSOSIG00000006874(CDH15);ENSOSIG00000…
GO:0014704	intercalated disc	8	49	0.000674881	0.0105968	ENSOSIG00000001923(ANK3);ENSOSIG00000002428(KCNA5);ENSOSIG00000004385(CAV3);ENSOSIG00000012712(FXYD6);ENSOSIG00000015858(ANXA6);ENSOSIG00000019577(Ank3);ENSOSIG00000019656(TJP1);ENSOSIG00000021196(Ank3)
GO:0033268	node of Ranvier	4	11	0.000675432	0.0105968	ENSOSIG00000010936(Scn8a);ENSOSIG00000017772(KCNQ3);ENSOSIG00000021196(Ank3);ENSOSIG00000023836(NFASC)
GO:0042734	presynaptic membrane	10	75	0.000792698	0.0121662	ENSOSIG00000004013(Cacna1c);ENSOSIG00000006650(ERC2);ENSOSIG00000009092(Snph);ENSOSIG00000010340(Cacna1c);ENSOSIG00000012828(GAD2);ENSOSIG00000014173(Rims1);ENSOSIG00000016475(STX1B);ENSOSIG00000016629(ADGRL1);ENSOSIG00000020370(Nrxn2);ENSOSIG00000023146(Rims2)
GO:0034702	ion channel complex	20	228	0.000889497	0.0133614	ENSOSIG00000000211(KCNH2);ENSOSIG00000001212(CACNA1H);ENSOSIG00000002428(KCNA5);ENSOSIG00000004013(Cacna1c);ENSOSIG00000006533(Shank1);ENSOSIG00000008348(Scn4a);ENSOSIG00000008429(CACNA1D);ENSOSIG00000010340(Cacna1c);ENSOSIG00000010936(Scn8a);ENSOSIG00000011197(KCND1);ENSOSIG00000012207(Gria4);ENSOSIG00000014319(stac3);ENSOSIG00000015858(ANXA6);ENSOSIG00000016083(Trpc5);ENSOSIG00000016267(pdzrn3b…
GO:0031232	extrinsic component of external side of plasma membrane	3	6	0.00117324	0.0172564	ENSOSIG00000008558(ANXA1);ENSOSIG00000016766(ANXA1);ENSOSIG00000022574(tf)
GO:0044291	cell-cell contact zone	9	67	0.00135863	0.0195754	ENSOSIG00000001923(ANK3);ENSOSIG00000002428(KCNA5);ENSOSIG00000004385(CAV3);ENSOSIG00000004541(--);ENSOSIG00000012712(FXYD6);ENSOSIG00000015858(ANXA6);ENSOSIG00000019577(Ank3);ENSOSIG00000019656(TJP1);ENSOSIG00000021196(Ank3)
GO:0019031	viral envelope	11	96	0.00158557	0.021813	ENSOSIG00000009059(des);ENSOSIG00000010043(MYL4);ENSOSIG00000011592(SRGAP3);ENSOSIG00000012486(krt8);ENSOSIG00000012509(krt8);ENSOSIG00000013482(krt8);ENSOSIG00000013780(--);ENSOSIG00000013799(--);ENSOSIG00000014681(Apob);ENSOSIG00000019670(--);ENSOSIG00000019672(apoeb)
GO:0036338	viral membrane	11	96	0.00158557	0.021813	ENSOSIG00000009059(des);ENSOSIG00000010043(MYL4);ENSOSIG00000011592(SRGAP3);ENSOSIG00000012486(krt8);ENSOSIG00000012509(krt8);ENSOSIG00000013482(krt8);ENSOSIG00000013780(--);ENSOSIG00000013799(--);ENSOSIG00000014681(Apob);ENSOSIG00000019670(--);ENSOSIG00000019672(apoeb)
GO:0002095	caveolar macromolecular signaling complex	2	2	0.00160662	0.021813	ENSOSIG00000004013(Cacna1c);ENSOSIG00000010340(Cacna1c)
GO:0031012	extracellular matrix	24	312	0.00180409	0.0240318	ENSOSIG00000000504(TENM2);ENSOSIG00000005175(SFRP1);ENSOSIG00000005672(MMP24);ENSOSIG00000005872(--);ENSOSIG00000007449(TGFBI);ENSOSIG00000008589(F2);ENSOSIG00000009804(gh);ENSOSIG00000013123(MATN1);ENSOSIG00000013600(egfl6);ENSOSIG00000013757(UCMA);ENSOSIG00000015987(MATN1);ENSOSIG00000016480(GPC5);ENSOSIG00000018652(lamb4);ENSOSIG00000019428(ECM2);ENSOSIG00000019725(SPON2);ENSOSIG00000020175(wn…
GO:0031672	A band	8	57	0.00186733	0.0242803	ENSOSIG00000001923(ANK3);ENSOSIG00000006916(lrrc39);ENSOSIG00000007616(rpl15);ENSOSIG00000010848(MYBPC3);ENSOSIG00000012953(Aldoa);ENSOSIG00000013956(MIB2);ENSOSIG00000019577(Ank3);ENSOSIG00000022958(unc45b)
GO:0043005	neuron projection	72	1275	0.00189153	0.0242803	ENSOSIG00000000399(PLCB4);ENSOSIG00000000504(TENM2);ENSOSIG00000001212(CACNA1H);ENSOSIG00000001923(ANK3);ENSOSIG00000002822(CNNM1);ENSOSIG00000004013(Cacna1c);ENSOSIG00000004973(Brsk2);ENSOSIG00000005373(CHRM2);ENSOSIG00000005769(DCC);ENSOSIG00000006533(Shank1);ENSOSIG00000006542(RPGR);ENSOSIG00000006650(ERC2);ENSOSIG00000007127(Arhgap44);ENSOSIG00000007185(CPEB2);ENSOSIG00000007391(CDKL5);ENSOSI…
GO:0034706	sodium channel complex	4	15	0.0024578	0.0303649	ENSOSIG00000008348(Scn4a);ENSOSIG00000010936(Scn8a);ENSOSIG00000012207(Gria4);ENSOSIG00000023979(Scn2a)
GO:0016324	apical plasma membrane	21	266	0.00249204	0.0303649	ENSOSIG00000001923(ANK3);ENSOSIG00000002428(KCNA5);ENSOSIG00000003742(MTCL1);ENSOSIG00000004541(--);ENSOSIG00000007754(ENPEP);ENSOSIG00000008429(CACNA1D);ENSOSIG00000008558(ANXA1);ENSOSIG00000009547(Slc4a5);ENSOSIG00000012712(FXYD6);ENSOSIG00000013311(ATP2B1);ENSOSIG00000015128(AQP1);ENSOSIG00000015858(ANXA6);ENSOSIG00000016766(ANXA1);ENSOSIG00000018711(myrip);ENSOSIG00000018946(CASQ1);ENSOSIG000…
GO:0005901	caveola	9	73	0.00249457	0.0303649	ENSOSIG00000001212(CACNA1H);ENSOSIG00000003982(Ehd2);ENSOSIG00000004013(Cacna1c);ENSOSIG00000004385(CAV3);ENSOSIG00000006874(CDH15);ENSOSIG00000010340(Cacna1c);ENSOSIG00000012712(FXYD6);ENSOSIG00000015128(AQP1);ENSOSIG00000022499(LRP8)
GO:0005887	integral component of plasma membrane	72	1300	0.00308774	0.0363896	ENSOSIG00000000211(KCNH2);ENSOSIG00000000504(TENM2);ENSOSIG00000001212(CACNA1H);ENSOSIG00000001322(STEAP2);ENSOSIG00000001923(ANK3);ENSOSIG00000002428(KCNA5);ENSOSIG00000003425(--);ENSOSIG00000003772(Adgrb2);ENSOSIG00000004013(Cacna1c);ENSOSIG00000004284(Camta1);ENSOSIG00000004541(--);ENSOSIG00000004989(Cspg5);ENSOSIG00000005279(PLPPR4);ENSOSIG00000005373(CHRM2);ENSOSIG00000005672(MMP24);ENSOSIG0…
GO:0042627	chylomicron	3	8	0.0030926	0.0363896	ENSOSIG00000013780(--);ENSOSIG00000013792(--);MSTRG.17959(APOB)
GO:0045211	postsynaptic membrane	18	224	0.00407791	0.0471968	ENSOSIG00000000504(TENM2);ENSOSIG00000001923(ANK3);ENSOSIG00000004013(Cacna1c);ENSOSIG00000005373(CHRM2);ENSOSIG00000006533(Shank1);ENSOSIG00000008324(dlgap1);ENSOSIG00000010340(Cacna1c);ENSOSIG00000010602(RAPSN);ENSOSIG00000012207(Gria4);ENSOSIG00000015587(IQSEC3);ENSOSIG00000015650(Nbea);ENSOSIG00000015765(CPEB3);ENSOSIG00000016510(LRRC7);ENSOSIG00000016938(Grid2ip);ENSOSIG00000017297(grip2);EN…
Molecular Function
GO ID	Description	Control-vs-BPF2000 (763)	All (18555)	pvalue	p.adjust	Genes
GO:0005509	calcium ion binding	66	780	2.09691e-08	2.68824e-05	ENSOSIG00000000154(CadN);ENSOSIG00000000245(PCDH10);ENSOSIG00000000399(PLCB4);ENSOSIG00000000504(TENM2);ENSOSIG00000000566(TNNC1);ENSOSIG00000000907(--);ENSOSIG00000001027(ANXA1);ENSOSIG00000003982(Ehd2);ENSOSIG00000004144(epd2);ENSOSIG00000004331(ANXA13);ENSOSIG00000004489(Celsr3);ENSOSIG00000004807(CadN);ENSOSIG00000005916(Clstn2);ENSOSIG00000006133(MYLPF);ENSOSIG00000006185(slc25a24);ENSOSIG00…
GO:0004970	ionotropic glutamate receptor activity	11	33	4.46946e-08	2.86492e-05	ENSOSIG00000003705(GRIN1);ENSOSIG00000003827(GRIN1);ENSOSIG00000005889(grin2a);ENSOSIG00000008764(GRIN2D);ENSOSIG00000010110(Grik5);ENSOSIG00000012207(Gria4);ENSOSIG00000015051(Grik5);ENSOSIG00000015781(grin2a);ENSOSIG00000017991(Grin2b);ENSOSIG00000018555(Grin2c);ENSOSIG00000021674(Grin2b)
GO:0008066	glutamate receptor activity	11	36	1.23921e-07	5.29554e-05	ENSOSIG00000003705(GRIN1);ENSOSIG00000003827(GRIN1);ENSOSIG00000005889(grin2a);ENSOSIG00000008764(GRIN2D);ENSOSIG00000010110(Grik5);ENSOSIG00000012207(Gria4);ENSOSIG00000015051(Grik5);ENSOSIG00000015781(grin2a);ENSOSIG00000017991(Grin2b);ENSOSIG00000018555(Grin2c);ENSOSIG00000021674(Grin2b)
GO:0030414	peptidase inhibitor activity	22	165	1.16002e-06	0.000371788	ENSOSIG00000002951(vwc2l);ENSOSIG00000004852(--);ENSOSIG00000005063(SFRP5);ENSOSIG00000006019(c3);ENSOSIG00000006099(c3);ENSOSIG00000006103(c3);ENSOSIG00000006282(c3);ENSOSIG00000006318(c3);ENSOSIG00000006670(c3);ENSOSIG00000009262(A2m);ENSOSIG00000009850(A2ML1);ENSOSIG00000011529(C3);ENSOSIG00000011836(gapdh);ENSOSIG00000014659(SERPINH1);ENSOSIG00000015325(WFDC1);ENSOSIG00000016267(pdzrn3b);ENSO…
GO:0005216	ion channel activity	49	596	3.30878e-06	0.000834915	ENSOSIG00000000211(KCNH2);ENSOSIG00000000219(ATP5MC3);ENSOSIG00000001212(CACNA1H);ENSOSIG00000002428(KCNA5);ENSOSIG00000003705(GRIN1);ENSOSIG00000003827(GRIN1);ENSOSIG00000004013(Cacna1c);ENSOSIG00000005889(grin2a);ENSOSIG00000007062(CACNA1H);ENSOSIG00000007618(CACNA1A);ENSOSIG00000008348(Scn4a);ENSOSIG00000008429(CACNA1D);ENSOSIG00000008764(GRIN2D);ENSOSIG00000009067(KCNT1);ENSOSIG00000010110(Gr…
GO:0004866	endopeptidase inhibitor activity	20	151	3.90756e-06	0.000834915	ENSOSIG00000004852(--);ENSOSIG00000005063(SFRP5);ENSOSIG00000006019(c3);ENSOSIG00000006099(c3);ENSOSIG00000006103(c3);ENSOSIG00000006282(c3);ENSOSIG00000006318(c3);ENSOSIG00000006670(c3);ENSOSIG00000009262(A2m);ENSOSIG00000009850(A2ML1);ENSOSIG00000011529(C3);ENSOSIG00000011836(gapdh);ENSOSIG00000014659(SERPINH1);ENSOSIG00000015325(WFDC1);ENSOSIG00000017717(PEBP1);ENSOSIG00000017752(COL28A1);ENSO…
GO:0061135	endopeptidase regulator activity	20	164	1.37648e-05	0.00252093	ENSOSIG00000004852(--);ENSOSIG00000005063(SFRP5);ENSOSIG00000006019(c3);ENSOSIG00000006099(c3);ENSOSIG00000006103(c3);ENSOSIG00000006282(c3);ENSOSIG00000006318(c3);ENSOSIG00000006670(c3);ENSOSIG00000009262(A2m);ENSOSIG00000009850(A2ML1);ENSOSIG00000011529(C3);ENSOSIG00000011836(gapdh);ENSOSIG00000014659(SERPINH1);ENSOSIG00000015325(WFDC1);ENSOSIG00000017717(PEBP1);ENSOSIG00000017752(COL28A1);ENSO…
GO:0022824	transmitter-gated ion channel activity	11	58	2.0562e-05	0.00292894	ENSOSIG00000003705(GRIN1);ENSOSIG00000003827(GRIN1);ENSOSIG00000005889(grin2a);ENSOSIG00000008764(GRIN2D);ENSOSIG00000010110(Grik5);ENSOSIG00000012207(Gria4);ENSOSIG00000015051(Grik5);ENSOSIG00000015781(grin2a);ENSOSIG00000017991(Grin2b);ENSOSIG00000018555(Grin2c);ENSOSIG00000021674(Grin2b)
GO:0022835	transmitter-gated channel activity	11	58	2.0562e-05	0.00292894	ENSOSIG00000003705(GRIN1);ENSOSIG00000003827(GRIN1);ENSOSIG00000005889(grin2a);ENSOSIG00000008764(GRIN2D);ENSOSIG00000010110(Grik5);ENSOSIG00000012207(Gria4);ENSOSIG00000015051(Grik5);ENSOSIG00000015781(grin2a);ENSOSIG00000017991(Grin2b);ENSOSIG00000018555(Grin2c);ENSOSIG00000021674(Grin2b)
GO:0015267	channel activity	49	643	2.52899e-05	0.00324216	ENSOSIG00000000211(KCNH2);ENSOSIG00000000219(ATP5MC3);ENSOSIG00000001212(CACNA1H);ENSOSIG00000002428(KCNA5);ENSOSIG00000003705(GRIN1);ENSOSIG00000003827(GRIN1);ENSOSIG00000004013(Cacna1c);ENSOSIG00000005889(grin2a);ENSOSIG00000007062(CACNA1H);ENSOSIG00000007618(CACNA1A);ENSOSIG00000008348(Scn4a);ENSOSIG00000008429(CACNA1D);ENSOSIG00000008764(GRIN2D);ENSOSIG00000009067(KCNT1);ENSOSIG00000010110(Gr…
GO:0022803	passive transmembrane transporter activity	49	646	2.85064e-05	0.00332229	ENSOSIG00000000211(KCNH2);ENSOSIG00000000219(ATP5MC3);ENSOSIG00000001212(CACNA1H);ENSOSIG00000002428(KCNA5);ENSOSIG00000003705(GRIN1);ENSOSIG00000003827(GRIN1);ENSOSIG00000004013(Cacna1c);ENSOSIG00000005889(grin2a);ENSOSIG00000007062(CACNA1H);ENSOSIG00000007618(CACNA1A);ENSOSIG00000008348(Scn4a);ENSOSIG00000008429(CACNA1D);ENSOSIG00000008764(GRIN2D);ENSOSIG00000009067(KCNT1);ENSOSIG00000010110(Gr…
GO:0015318	inorganic molecular entity transmembrane transporter activity	82	1291	5.26192e-05	0.00562148	ENSOSIG00000000029(Fabp3);ENSOSIG00000000211(KCNH2);ENSOSIG00000000219(ATP5MC3);ENSOSIG00000001212(CACNA1H);ENSOSIG00000002428(KCNA5);ENSOSIG00000003705(GRIN1);ENSOSIG00000003827(GRIN1);ENSOSIG00000004013(Cacna1c);ENSOSIG00000004014(--);ENSOSIG00000004489(Celsr3);ENSOSIG00000005459(SLC34A2);ENSOSIG00000005515(Cox5b);ENSOSIG00000005889(grin2a);ENSOSIG00000005940(CP);ENSOSIG00000007062(CACNA1H);ENS…
GO:0061134	peptidase regulator activity	22	211	6.10137e-05	0.00601689	ENSOSIG00000002951(vwc2l);ENSOSIG00000004852(--);ENSOSIG00000005063(SFRP5);ENSOSIG00000006019(c3);ENSOSIG00000006099(c3);ENSOSIG00000006103(c3);ENSOSIG00000006282(c3);ENSOSIG00000006318(c3);ENSOSIG00000006670(c3);ENSOSIG00000009262(A2m);ENSOSIG00000009850(A2ML1);ENSOSIG00000011529(C3);ENSOSIG00000011836(gapdh);ENSOSIG00000014659(SERPINH1);ENSOSIG00000015325(WFDC1);ENSOSIG00000016267(pdzrn3b);ENSO…
GO:0015075	ion transmembrane transporter activity	86	1383	7.23264e-05	0.00662303	ENSOSIG00000000029(Fabp3);ENSOSIG00000000211(KCNH2);ENSOSIG00000000219(ATP5MC3);ENSOSIG00000001212(CACNA1H);ENSOSIG00000002428(KCNA5);ENSOSIG00000003705(GRIN1);ENSOSIG00000003827(GRIN1);ENSOSIG00000004013(Cacna1c);ENSOSIG00000004014(--);ENSOSIG00000004489(Celsr3);ENSOSIG00000005459(SLC34A2);ENSOSIG00000005515(Cox5b);ENSOSIG00000005889(grin2a);ENSOSIG00000005940(CP);ENSOSIG00000005944(dhdh);ENSOSI…
GO:0030594	neurotransmitter receptor activity	13	91	8.60727e-05	0.00720298	ENSOSIG00000003705(GRIN1);ENSOSIG00000003827(GRIN1);ENSOSIG00000005373(CHRM2);ENSOSIG00000005889(grin2a);ENSOSIG00000008764(GRIN2D);ENSOSIG00000010110(Grik5);ENSOSIG00000011656(znf219);ENSOSIG00000012207(Gria4);ENSOSIG00000015051(Grik5);ENSOSIG00000015781(grin2a);ENSOSIG00000017991(Grin2b);ENSOSIG00000018555(Grin2c);ENSOSIG00000021674(Grin2b)
GO:0008331	high voltage-gated calcium channel activity	4	7	8.98968e-05	0.00720298	ENSOSIG00000004013(Cacna1c);ENSOSIG00000008429(CACNA1D);ENSOSIG00000010340(Cacna1c);ENSOSIG00000016403(CACNA1E)
GO:0003993	acid phosphatase activity	16	135	0.000137239	0.0103494	ENSOSIG00000003441(MYOM2);ENSOSIG00000003589(DSCAML1);ENSOSIG00000004583(DSCAML1);ENSOSIG00000005769(DCC);ENSOSIG00000006909(ptprf);ENSOSIG00000007161(SDK2);ENSOSIG00000007316(FSD2);ENSOSIG00000010001(FNDC1);ENSOSIG00000014545(MYBPH);ENSOSIG00000014568(IGFN1);ENSOSIG00000015148(Ttn);ENSOSIG00000016175(NCAM1);ENSOSIG00000019488(SDK2);ENSOSIG00000019499(IGDCC3);ENSOSIG00000023577(PTPRS);ENSOSIG0000…
GO:0022836	gated channel activity	31	383	0.000273148	0.0194542	ENSOSIG00000000211(KCNH2);ENSOSIG00000001212(CACNA1H);ENSOSIG00000002428(KCNA5);ENSOSIG00000003705(GRIN1);ENSOSIG00000003827(GRIN1);ENSOSIG00000004013(Cacna1c);ENSOSIG00000005889(grin2a);ENSOSIG00000008429(CACNA1D);ENSOSIG00000008764(GRIN2D);ENSOSIG00000010110(Grik5);ENSOSIG00000010340(Cacna1c);ENSOSIG00000010936(Scn8a);ENSOSIG00000011197(KCND1);ENSOSIG00000012207(Gria4);ENSOSIG00000014301(ANO3);…
GO:0005544	calcium-dependent phospholipid binding	8	46	0.000513716	0.0346623	ENSOSIG00000001027(ANXA1);ENSOSIG00000004331(ANXA13);ENSOSIG00000008558(ANXA1);ENSOSIG00000015858(ANXA6);ENSOSIG00000016766(ANXA1);ENSOSIG00000017561(DOC2B);ENSOSIG00000018373(PCLO);ENSOSIG00000021070(PCLO)
GO:0086007	voltage-gated calcium channel activity involved in cardiac muscle cell action potential	3	5	0.00065084	0.0417189	ENSOSIG00000004013(Cacna1c);ENSOSIG00000008429(CACNA1D);ENSOSIG00000010340(Cacna1c)
GO:0042805	actinin binding	8	49	0.000796616	0.0486315	ENSOSIG00000002428(KCNA5);ENSOSIG00000004013(Cacna1c);ENSOSIG00000005528(PDLIM3);ENSOSIG00000008429(CACNA1D);ENSOSIG00000010340(Cacna1c);ENSOSIG00000010848(MYBPC3);ENSOSIG00000016083(Trpc5);ENSOSIG00000023021(LDB3)
