# Supplementary material for: Transcriptome Analysis of the Developmental Effects of Bisphenol F Exposure in Chinese Medaka (Oryzias sinensis)
Source: Int J Mol Sci. 2023 Jun 30;24(13):10898. doi: 10.3390/ijms241310898 (PMC10341846; doi:10.3390/ijms241310898)
Supplement: Supplementary file 1 [file ijms-24-10898-s001.zip › Table S5 KEGG Control vs BPF200.xlsx]

## Sheet: Control-vs-BPF200
KEGG_A_class	KEGG_B_class	Pathway	Control-vs-BPF200 (6)	All (9460)	Pvalue	Qvalue	Pathway ID	Genes	K_IDs
Organismal Systems	Immune system	Complement and coagulation cascades	3	94	1.85977e-05	0.000502139	ko04610	ENSOSIG00000006019(c3);ENSOSIG00000006282(c3);ENSOSIG00000009720(KLKB1)	K03990+K03990+K01324
Human Diseases	Infectious disease: bacterial	Staphylococcus aureus infection	3	150	7.54686e-05	0.00101883	ko05150	ENSOSIG00000004830(Krt20);ENSOSIG00000006019(c3);ENSOSIG00000006282(c3)	K07604+K03990+K03990
Human Diseases	Infectious disease: bacterial	Legionellosis	2	85	0.00116915	0.0105223	ko05134	ENSOSIG00000006019(c3);ENSOSIG00000006282(c3)	K03990+K03990
Human Diseases	Infectious disease: bacterial	Pertussis	2	109	0.00191457	0.0129233	ko05133	ENSOSIG00000006019(c3);ENSOSIG00000006282(c3)	K03990+K03990
Human Diseases	Infectious disease: parasitic	Leishmaniasis	2	134	0.00287806	0.0155415	ko05140	ENSOSIG00000006019(c3);ENSOSIG00000006282(c3)	K03990+K03990
Human Diseases	Immune disease	Systemic lupus erythematosus	2	171	0.00464544	0.0183305	ko05322	ENSOSIG00000006019(c3);ENSOSIG00000006282(c3)	K03990+K03990
Human Diseases	Endocrine and metabolic disease	Alcoholic liver disease	2	173	0.00475236	0.0183305	ko04936	ENSOSIG00000006019(c3);ENSOSIG00000006282(c3)	K03990+K03990
Human Diseases	Infectious disease: parasitic	Chagas disease	2	195	0.00600421	0.0187875	ko05142	ENSOSIG00000006019(c3);ENSOSIG00000006282(c3)	K03990+K03990
Organismal Systems	Immune system	Neutrophil extracellular trap formation	2	210	0.00693636	0.0187875	ko04613	ENSOSIG00000006019(c3);ENSOSIG00000006282(c3)	K03990+K03990
Metabolism	Amino acid metabolism	Phenylalanine, tyrosine and tryptophan biosynthesis	1	11	0.00695833	0.0187875	ko00400	ENSOSIG00000023216(--)	K03334
Cellular Processes	Transport and catabolism	Phagosome	2	249	0.00965147	0.021559	ko04145	ENSOSIG00000006019(c3);ENSOSIG00000006282(c3)	K03990+K03990
Human Diseases	Infectious disease: bacterial	Tuberculosis	2	259	0.0104142	0.021559	ko05152	ENSOSIG00000006019(c3);ENSOSIG00000006282(c3)	K03990+K03990
Human Diseases	Infectious disease: viral	Coronavirus disease - COVID-19	2	283	0.0123528	0.021559	ko05171	ENSOSIG00000006019(c3);ENSOSIG00000006282(c3)	K03990+K03990
Human Diseases	Infectious disease: viral	Kaposi sarcoma-associated herpesvirus infection	2	286	0.0126058	0.021559	ko05167	ENSOSIG00000006019(c3);ENSOSIG00000006282(c3)	K03990+K03990
Metabolism	Amino acid metabolism	Phenylalanine metabolism	1	20	0.0126214	0.021559	ko00360	ENSOSIG00000023216(--)	K03334
Human Diseases	Cancer: overview	Viral carcinogenesis	2	288	0.0127757	0.021559	ko05203	ENSOSIG00000006019(c3);ENSOSIG00000006282(c3)	K03990+K03990
Human Diseases	Infectious disease: bacterial	Shigellosis	2	361	0.0196723	0.0312442	ko05131	ENSOSIG00000006019(c3);ENSOSIG00000006282(c3)	K03990+K03990
Metabolism	Glycan biosynthesis and metabolism	Glycosphingolipid biosynthesis - lacto and neolacto series	1	37	0.023245	0.0348676	ko00601	ENSOSIG00000008968(ST3GAL4)	K03494
Metabolism	Amino acid metabolism	Tyrosine metabolism	1	43	0.0269717	0.0380853	ko00350	ENSOSIG00000023216(--)	K03334
Metabolism	Amino acid metabolism	Alanine, aspartate and glutamate metabolism	1	45	0.0282113	0.0380853	ko00250	ENSOSIG00000023216(--)	K03334
Human Diseases	Infectious disease: viral	Herpes simplex virus 1 infection	2	473	0.0327254	0.0406921	ko05168	ENSOSIG00000006019(c3);ENSOSIG00000006282(c3)	K03990+K03990
Metabolism	Amino acid metabolism	Tryptophan metabolism	1	53	0.0331565	0.0406921	ko00380	ENSOSIG00000023216(--)	K03334
Metabolism	Amino acid metabolism	Valine, leucine and isoleucine degradation	1	64	0.039922	0.0456019	ko00280	ENSOSIG00000023216(--)	K03334
Metabolism	Amino acid metabolism	Cysteine and methionine metabolism	1	65	0.040535	0.0456019	ko00270	ENSOSIG00000023216(--)	K03334
