# Supplementary material for: Transcriptome Analysis of the Developmental Effects of Bisphenol F Exposure in Chinese Medaka (Oryzias sinensis)
Source: Int J Mol Sci. 2023 Jun 30;24(13):10898. doi: 10.3390/ijms241310898 (PMC10341846; doi:10.3390/ijms241310898)
Supplement: Supplementary file 1 [file ijms-24-10898-s001.zip › Table S6 KEGG Control vs BPF2000.xlsx]

## Sheet: Control-vs-BPF2000
KEGG_A_class	KEGG_B_class	Pathway	Control-vs-BPF2000 (371)	All (9460)	Pvalue	Qvalue	Pathway ID	Genes	K_IDs
Organismal Systems	Immune system	Complement and coagulation cascades	23	94	8.76762e-13	2.63029e-10	ko04610	ENSOSIG00000000591(CPB2);ENSOSIG00000002140(Plg);ENSOSIG00000004321(--);ENSOSIG00000006019(c3);ENSOSIG00000006099(c3);ENSOSIG00000006103(c3);ENSOSIG00000006282(c3);ENSOSIG00000006318(c3);ENSOSIG00000006595(c5ar1);ENSOSIG00000006661(PROC);ENSOSIG00000006670(c3);ENSOSIG00000008525(CFHR2);ENSOSIG00000008541(CSMD3);ENSOSIG00000008589(F2);ENSOSIG00000009702(F11);ENSOSIG00000009720(KLKB1);ENSOSIG000000…	K01300+K01315+K03985+K03990+K03990+K03990+K03990+K03990+K04010+K01344+K03990+K04004+K04004+K01313+K01324+K01324+K01314+K04004+K04004+K03912+K01333+K03990+K03994
Organismal Systems	Circulatory system	Cardiac muscle contraction	23	151	1.96258e-08	2.94387e-06	ko04260	ENSOSIG00000000566(TNNC1);ENSOSIG00000004013(Cacna1c);ENSOSIG00000004335(--);ENSOSIG00000005515(Cox5b);ENSOSIG00000007949(act2);ENSOSIG00000008429(CACNA1D);ENSOSIG00000010340(Cacna1c);ENSOSIG00000010553(Cacna2d2);ENSOSIG00000010557(acta1);ENSOSIG00000011095(--);ENSOSIG00000013283(act2);ENSOSIG00000014469(SLC8A1);ENSOSIG00000015054(Cox4i1);ENSOSIG00000015238(Myl3);ENSOSIG00000016739(TNNT2);ENSOSIG…	K05865+K04850+K23450+K02265+K12314+K04851+K04850+K04859+K12314+K10373+K12314+K05849+K02263+K12749+K12045+K12314+K04866+K02270+K12045+K04857+K04853+K04962+K04962
Human Diseases	Cardiovascular disease	Hypertrophic cardiomyopathy	24	171	4.89313e-08	4.89313e-06	ko05410	ENSOSIG00000000566(TNNC1);ENSOSIG00000004013(Cacna1c);ENSOSIG00000007949(act2);ENSOSIG00000007995(des);ENSOSIG00000008429(CACNA1D);ENSOSIG00000009059(des);ENSOSIG00000010340(Cacna1c);ENSOSIG00000010553(Cacna2d2);ENSOSIG00000010557(acta1);ENSOSIG00000011095(--);ENSOSIG00000013283(act2);ENSOSIG00000014469(SLC8A1);ENSOSIG00000015238(Myl3);ENSOSIG00000016739(TNNT2);ENSOSIG00000018053(act2);ENSOSIG000…	K05865+K04850+K12314+K07610+K04851+K07610+K04850+K04859+K12314+K10373+K12314+K05849+K12749+K12045+K12314+K04866+K13377+K12045+K01283+K07200+K04857+K04853+K04962+K04962
Organismal Systems	Nervous system	Glutamatergic synapse	25	190	9.37579e-08	5.60811e-06	ko04724	ENSOSIG00000000399(PLCB4);ENSOSIG00000003705(GRIN1);ENSOSIG00000003827(GRIN1);ENSOSIG00000004013(Cacna1c);ENSOSIG00000005889(grin2a);ENSOSIG00000007618(CACNA1A);ENSOSIG00000008324(dlgap1);ENSOSIG00000008429(CACNA1D);ENSOSIG00000008764(GRIN2D);ENSOSIG00000010110(Grik5);ENSOSIG00000010340(Cacna1c);ENSOSIG00000011669(CACNA1A);ENSOSIG00000012207(Gria4);ENSOSIG00000014506(GRM5);ENSOSIG00000015051(Grik…	K05858+K05208+K05208+K04850+K05209+K04344+K15008+K04851+K05212+K05205+K04850+K04344+K05200+K04604+K05205+K12302+K05210+K04609+K05211+K08048+K05210+K08041+K04604+K05212+K13576
Environmental Information Processing	Signal transduction	Calcium signaling pathway	44	481	1.08533e-07	5.60811e-06	ko04020	ENSOSIG00000000399(PLCB4);ENSOSIG00000000566(TNNC1);ENSOSIG00000001212(CACNA1H);ENSOSIG00000003705(GRIN1);ENSOSIG00000003827(GRIN1);ENSOSIG00000004013(Cacna1c);ENSOSIG00000004335(--);ENSOSIG00000005373(CHRM2);ENSOSIG00000005889(grin2a);ENSOSIG00000007349(phka2);ENSOSIG00000007618(CACNA1A);ENSOSIG00000008429(CACNA1D);ENSOSIG00000008764(GRIN2D);ENSOSIG00000010340(Cacna1c);ENSOSIG00000011669(CACNA1A…	K05858+K05865+K04855+K05208+K05208+K04850+K23450+K04130+K05209+K07190+K04344+K04851+K05212+K04850+K04344+K05450+K05863+K05850+K04360+K05849+K04604+K12042+K05850+K04852+K04856+K04852+K05211+K23468+K08048+K04849+K05219+K05869+K05101+K02183+K08041+K08794+K04604+K05212+K04857+K04963+K04853+K04849+K04962+K04962
Organismal Systems	Nervous system	Long-term potentiation	18	105	1.12162e-07	5.60811e-06	ko04720	ENSOSIG00000000399(PLCB4);ENSOSIG00000003705(GRIN1);ENSOSIG00000003827(GRIN1);ENSOSIG00000004013(Cacna1c);ENSOSIG00000005889(grin2a);ENSOSIG00000006379(EP300);ENSOSIG00000008764(GRIN2D);ENSOSIG00000010340(Cacna1c);ENSOSIG00000014506(GRM5);ENSOSIG00000017991(Grin2b);ENSOSIG00000018555(Grin2c);ENSOSIG00000020333(ADCY8);ENSOSIG00000021674(Grin2b);ENSOSIG00000022256(Camk4);ENSOSIG00000022876(CALML4);…	K05858+K05208+K05208+K04850+K05209+K04498+K05212+K04850+K04604+K05210+K05211+K08048+K05210+K05869+K02183+K08041+K04604+K05212
Organismal Systems	Circulatory system	Adrenergic signaling in cardiomyocytes	29	265	4.99231e-07	2.13956e-05	ko04261	ENSOSIG00000000399(PLCB4);ENSOSIG00000000566(TNNC1);ENSOSIG00000003407(Scn1b);ENSOSIG00000004013(Cacna1c);ENSOSIG00000005595(AKT3);ENSOSIG00000007949(act2);ENSOSIG00000008348(Scn4a);ENSOSIG00000008429(CACNA1D);ENSOSIG00000010340(Cacna1c);ENSOSIG00000010553(Cacna2d2);ENSOSIG00000010557(acta1);ENSOSIG00000011095(--);ENSOSIG00000011233(PPP2R5B);ENSOSIG00000013283(act2);ENSOSIG00000013311(ATP2B1);ENS…	K05858+K05865+K04845+K04850+K04456+K12314+K04838+K04851+K04850+K04859+K12314+K10373+K11584+K12314+K05850+K05849+K12749+K05850+K12045+K12314+K04866+K08048+K02183+K08041+K12045+K04857+K04853+K04962+K04962
Organismal Systems	Environmental adaptation	Circadian entrainment	23	181	5.82951e-07	2.18606e-05	ko04713	ENSOSIG00000000399(PLCB4);ENSOSIG00000001212(CACNA1H);ENSOSIG00000003705(GRIN1);ENSOSIG00000003827(GRIN1);ENSOSIG00000004013(Cacna1c);ENSOSIG00000005889(grin2a);ENSOSIG00000008429(CACNA1D);ENSOSIG00000008764(GRIN2D);ENSOSIG00000010340(Cacna1c);ENSOSIG00000012207(Gria4);ENSOSIG00000016978(Cacna1i);ENSOSIG00000017991(Grin2b);ENSOSIG00000018555(Grin2c);ENSOSIG00000020087(GUCY1A2);ENSOSIG00000020333(…	K05858+K04855+K05208+K05208+K04850+K05209+K04851+K05212+K04850+K05200+K04856+K05210+K05211+K12318+K08048+K05210+K02183+K08041+K19477+K05212+K04963+K04962+K04962
Human Diseases	Substance dependence	Nicotine addiction	14	81	2.65383e-06	8.8461e-05	ko05033	ENSOSIG00000003705(GRIN1);ENSOSIG00000003827(GRIN1);ENSOSIG00000005889(grin2a);ENSOSIG00000007618(CACNA1A);ENSOSIG00000008764(GRIN2D);ENSOSIG00000011669(CACNA1A);ENSOSIG00000012207(Gria4);ENSOSIG00000016354(slc17a6b);ENSOSIG00000017991(Grin2b);ENSOSIG00000018555(Grin2c);ENSOSIG00000020358(CACNA1B);ENSOSIG00000021674(Grin2b);MSTRG.14363(Grin2d);MSTRG.6287(CACNA1B)	K05208+K05208+K05209+K04344+K05212+K04344+K05200+K12302+K05210+K05211+K04849+K05210+K05212+K04849
Human Diseases	Cardiovascular disease	Dilated cardiomyopathy	24	223	6.60561e-06	0.000198168	ko05414	ENSOSIG00000000566(TNNC1);ENSOSIG00000004013(Cacna1c);ENSOSIG00000007949(act2);ENSOSIG00000007995(des);ENSOSIG00000008429(CACNA1D);ENSOSIG00000009059(des);ENSOSIG00000010340(Cacna1c);ENSOSIG00000010553(Cacna2d2);ENSOSIG00000010557(acta1);ENSOSIG00000011095(--);ENSOSIG00000013283(act2);ENSOSIG00000014469(SLC8A1);ENSOSIG00000015238(Myl3);ENSOSIG00000016739(TNNT2);ENSOSIG00000018053(act2);ENSOSIG000…	K05865+K04850+K12314+K07610+K04851+K07610+K04850+K04859+K12314+K10373+K12314+K05849+K12749+K12045+K12314+K04866+K08048+K13377+K08041+K12045+K04857+K04853+K04962+K04962
Human Diseases	Infectious disease: bacterial	Staphylococcus aureus infection	18	150	2.21499e-05	0.000604088	ko05150	ENSOSIG00000002140(Plg);ENSOSIG00000002829(krt13);ENSOSIG00000006019(c3);ENSOSIG00000006099(c3);ENSOSIG00000006103(c3);ENSOSIG00000006282(c3);ENSOSIG00000006318(c3);ENSOSIG00000006595(c5ar1);ENSOSIG00000006670(c3);ENSOSIG00000008525(CFHR2);ENSOSIG00000008541(CSMD3);ENSOSIG00000010635(CFH);ENSOSIG00000013368(CFHR2);ENSOSIG00000013680(krt13);ENSOSIG00000016154(krt13);MSTRG.18161(CFI);MSTRG.27186(c3…	K01315+K07604+K03990+K03990+K03990+K03990+K03990+K04010+K03990+K04004+K04004+K04004+K04004+K07604+K07604+K01333+K03990+K03994
Human Diseases	Neurodegenerative disease	Prion disease	30	345	3.42094e-05	0.000855234	ko05020	ENSOSIG00000000219(ATP5MC3);ENSOSIG00000003705(GRIN1);ENSOSIG00000003827(GRIN1);ENSOSIG00000004013(Cacna1c);ENSOSIG00000004385(CAV3);ENSOSIG00000004501(hsc71);ENSOSIG00000005515(Cox5b);ENSOSIG00000005889(grin2a);ENSOSIG00000007441(NDUFA2);ENSOSIG00000008429(CACNA1D);ENSOSIG00000008764(GRIN2D);ENSOSIG00000010152(CAV2);ENSOSIG00000010340(Cacna1c);ENSOSIG00000012300(SLC25A4);ENSOSIG00000015054(Cox4i…	K02128+K05208+K05208+K04850+K12959+K03283+K02265+K05209+K03946+K04851+K05212+K12958+K04850+K05863+K02263+K06491+K05210+K05211+K04849+K05210+K02270+K05212+K04857+K04963+K07374+K04853+K04849+K04962+K04962+K03994
Metabolism	Carbohydrate metabolism	Glycolysis / Gluconeogenesis	13	94	7.09719e-05	0.00152083	ko00010	ENSOSIG00000000819(pkm);ENSOSIG00000002169(ENO3);ENSOSIG00000004792(ADH5);ENSOSIG00000004889(ldha);ENSOSIG00000011836(gapdh);ENSOSIG00000012953(Aldoa);ENSOSIG00000014394(tpi1b);ENSOSIG00000017628(PFKM);ENSOSIG00000019981(PGM1);ENSOSIG00000022906(PGAM2);ENSOSIG00000023167(GPI);MSTRG.30150(ACSS2);MSTRG.39732(ldha)	K00873+K01689+K00121+K00016+K00134+K01623+K01803+K00850+K01835+K01834+K01810+K01895+K00016
Organismal Systems	Endocrine system	GnRH secretion	13	94	7.09719e-05	0.00152083	ko04929	ENSOSIG00000000399(PLCB4);ENSOSIG00000001212(CACNA1H);ENSOSIG00000004013(Cacna1c);ENSOSIG00000005595(AKT3);ENSOSIG00000008429(CACNA1D);ENSOSIG00000010340(Cacna1c);ENSOSIG00000011069(Gabbr1);ENSOSIG00000015437(KCNN3);ENSOSIG00000016083(Trpc5);ENSOSIG00000016978(Cacna1i);ENSOSIG00000022148(Hcn2);MSTRG.32420(CACNA1S);MSTRG.36205(Cacna1f)	K05858+K04855+K04850+K04456+K04851+K04850+K04615+K04944+K04968+K04856+K04955+K04857+K04853
Organismal Systems	Endocrine system	Renin secretion	14	108	7.77317e-05	0.00155463	ko04924	ENSOSIG00000000399(PLCB4);ENSOSIG00000004013(Cacna1c);ENSOSIG00000008429(CACNA1D);ENSOSIG00000010340(Cacna1c);ENSOSIG00000012024(EDN3);ENSOSIG00000014309(PDE3A);ENSOSIG00000015128(AQP1);ENSOSIG00000016460(CTSB);ENSOSIG00000020087(GUCY1A2);ENSOSIG00000022876(CALML4);ENSOSIG00000023560(PRKG2);MSTRG.17154(ACE);MSTRG.32420(CACNA1S);MSTRG.36205(Cacna1f)	K05858+K04850+K04851+K04850+K05227+K19021+K09864+K01363+K12318+K02183+K19477+K01283+K04857+K04853
Human Diseases	Endocrine and metabolic disease	Type II diabetes mellitus	11	74	0.000131837	0.00247193	ko04930	ENSOSIG00000000819(pkm);ENSOSIG00000004013(Cacna1c);ENSOSIG00000007618(CACNA1A);ENSOSIG00000008429(CACNA1D);ENSOSIG00000010340(Cacna1c);ENSOSIG00000011669(CACNA1A);ENSOSIG00000016403(CACNA1E);ENSOSIG00000017146(Cacna1e);ENSOSIG00000020358(CACNA1B);ENSOSIG00000023701(Irs1);MSTRG.6287(CACNA1B)	K00873+K04850+K04344+K04851+K04850+K04344+K04852+K04852+K04849+K16172+K04849
Human Diseases	Substance dependence	Amphetamine addiction	14	116	0.000169472	0.00299068	ko05031	ENSOSIG00000003705(GRIN1);ENSOSIG00000003827(GRIN1);ENSOSIG00000004013(Cacna1c);ENSOSIG00000005889(grin2a);ENSOSIG00000008429(CACNA1D);ENSOSIG00000008764(GRIN2D);ENSOSIG00000010340(Cacna1c);ENSOSIG00000012207(Gria4);ENSOSIG00000017991(Grin2b);ENSOSIG00000018555(Grin2c);ENSOSIG00000021674(Grin2b);ENSOSIG00000022256(Camk4);ENSOSIG00000022876(CALML4);MSTRG.14363(Grin2d)	K05208+K05208+K04850+K05209+K04851+K05212+K04850+K05200+K05210+K05211+K05210+K05869+K02183+K05212
Metabolism	Xenobiotics biodegradation and metabolism	Drug metabolism - cytochrome P450	9	53	0.000191019	0.00318365	ko00982	ENSOSIG00000001505(GSTF14);ENSOSIG00000003175(--);ENSOSIG00000004792(ADH5);ENSOSIG00000005423(GSTK1);ENSOSIG00000005895(FMO5);ENSOSIG00000010511(GSTA4);ENSOSIG00000011126(MGST1);ENSOSIG00000013407(GSTT4);ENSOSIG00000022777(GSTM3)	K00799+K00799+K00121+K13299+K00485+K00799+K00799+K00799+K00799
Metabolism	Xenobiotics biodegradation and metabolism	Metabolism of xenobiotics by cytochrome P450	9	59	0.000440209	0.00695066	ko00980	ENSOSIG00000001505(GSTF14);ENSOSIG00000003175(--);ENSOSIG00000004792(ADH5);ENSOSIG00000005423(GSTK1);ENSOSIG00000005944(dhdh);ENSOSIG00000010511(GSTA4);ENSOSIG00000011126(MGST1);ENSOSIG00000013407(GSTT4);ENSOSIG00000022777(GSTM3)	K00799+K00799+K00121+K13299+K00078+K00799+K00799+K00799+K00799
Environmental Information Processing	Signal transduction	cAMP signaling pathway	29	381	0.000465085	0.00697627	ko04024	ENSOSIG00000003705(GRIN1);ENSOSIG00000003827(GRIN1);ENSOSIG00000004013(Cacna1c);ENSOSIG00000005373(CHRM2);ENSOSIG00000005595(AKT3);ENSOSIG00000005889(grin2a);ENSOSIG00000006379(EP300);ENSOSIG00000008429(CACNA1D);ENSOSIG00000008764(GRIN2D);ENSOSIG00000010340(Cacna1c);ENSOSIG00000011069(Gabbr1);ENSOSIG00000012024(EDN3);ENSOSIG00000012207(Gria4);ENSOSIG00000013311(ATP2B1);ENSOSIG00000014309(PDE3A);E…	K05208+K05208+K04850+K04130+K04456+K05209+K04498+K04851+K05212+K04850+K04615+K05227+K05200+K05850+K19021+K05850+K05210+K05211+K08048+K05210+K04955+K05869+K02183+K08041+K05212+K04857+K04853+K04962+K04962
Metabolism	Amino acid metabolism	Lysine degradation	11	86	0.000506777	0.00723968	ko00310	ENSOSIG00000004952(KMT2E);ENSOSIG00000006127(Setd1a);ENSOSIG00000006154(Smyd1);ENSOSIG00000011282(SMYD2);ENSOSIG00000014937(Echs1);ENSOSIG00000018371(KMT2A);ENSOSIG00000018425(ASH1L);ENSOSIG00000021897(SMYD1);MSTRG.22474(Kmt2c);MSTRG.32399(KMT2D);MSTRG.34080(--)	K09189+K11422+K11426+K11426+K07511+K09186+K06101+K11426+K09188+K09187+K09188
Organismal Systems	Endocrine system	Aldosterone synthesis and secretion	15	149	0.000732089	0.00998304	ko04925	ENSOSIG00000000399(PLCB4);ENSOSIG00000001212(CACNA1H);ENSOSIG00000004013(Cacna1c);ENSOSIG00000008429(CACNA1D);ENSOSIG00000010340(Cacna1c);ENSOSIG00000013311(ATP2B1);ENSOSIG00000015495(ATP2B2);ENSOSIG00000016978(Cacna1i);ENSOSIG00000020333(ADCY8);ENSOSIG00000022256(Camk4);ENSOSIG00000022876(CALML4);ENSOSIG00000023112(ADCY1);ENSOSIG00000023728(Camk1g);MSTRG.32420(CACNA1S);MSTRG.36205(Cacna1f)	K05858+K04855+K04850+K04851+K04850+K05850+K05850+K04856+K08048+K05869+K02183+K08041+K08794+K04857+K04853
Organismal Systems	Nervous system	GABAergic synapse	16	167	0.00084712	0.0110494	ko04727	ENSOSIG00000001003(SLC6A1);ENSOSIG00000004013(Cacna1c);ENSOSIG00000007618(CACNA1A);ENSOSIG00000008246(Slc12a5);ENSOSIG00000008429(CACNA1D);ENSOSIG00000010340(Cacna1c);ENSOSIG00000011069(Gabbr1);ENSOSIG00000011669(CACNA1A);ENSOSIG00000012828(GAD2);ENSOSIG00000020333(ADCY8);ENSOSIG00000020358(CACNA1B);ENSOSIG00000023112(ADCY1);MSTRG.17971(Slc38a3);MSTRG.32420(CACNA1S);MSTRG.36205(Cacna1f);MSTRG.628…	K05034+K04850+K04344+K23967+K04851+K04850+K04615+K04344+K01580+K08048+K04849+K08041+K13576+K04857+K04853+K04849
Organismal Systems	Nervous system	Retrograde endocannabinoid signaling	19	218	0.000921716	0.0111588	ko04723	ENSOSIG00000000399(PLCB4);ENSOSIG00000004013(Cacna1c);ENSOSIG00000007441(NDUFA2);ENSOSIG00000007618(CACNA1A);ENSOSIG00000008429(CACNA1D);ENSOSIG00000010340(Cacna1c);ENSOSIG00000011669(CACNA1A);ENSOSIG00000012207(Gria4);ENSOSIG00000014173(Rims1);ENSOSIG00000014506(GRM5);ENSOSIG00000016354(slc17a6b);ENSOSIG00000020333(ADCY8);ENSOSIG00000020358(CACNA1B);ENSOSIG00000023112(ADCY1);ENSOSIG00000023578(R…	K05858+K04850+K03946+K04344+K04851+K04850+K04344+K05200+K15291+K04604+K12302+K08048+K04849+K08041+K15291+K04604+K04857+K04853+K04849
Human Diseases	Neurodegenerative disease	Alzheimer disease	34	494	0.000950959	0.0111588	ko05010	ENSOSIG00000000219(ATP5MC3);ENSOSIG00000000399(PLCB4);ENSOSIG00000003705(GRIN1);ENSOSIG00000003827(GRIN1);ENSOSIG00000004013(Cacna1c);ENSOSIG00000005515(Cox5b);ENSOSIG00000005595(AKT3);ENSOSIG00000005889(grin2a);ENSOSIG00000006253(WNT9B);ENSOSIG00000007441(NDUFA2);ENSOSIG00000008429(CACNA1D);ENSOSIG00000008764(GRIN2D);ENSOSIG00000010340(Cacna1c);ENSOSIG00000011836(gapdh);ENSOSIG00000012300(SLC25A…	K02128+K05858+K05208+K05208+K04850+K02265+K04456+K05209+K01064+K03946+K04851+K05212+K04850+K00134+K05863+K11716+K04604+K02263+K05210+K05211+K04524+K11716+K00444+K05210+K02270+K02183+K16172+K04604+K05212+K04550+K04857+K04963+K07374+K04853
Organismal Systems	Nervous system	Cholinergic synapse	18	202	0.0009671	0.0111588	ko04725	ENSOSIG00000000399(PLCB4);ENSOSIG00000004013(Cacna1c);ENSOSIG00000005373(CHRM2);ENSOSIG00000005595(AKT3);ENSOSIG00000007618(CACNA1A);ENSOSIG00000008429(CACNA1D);ENSOSIG00000010340(Cacna1c);ENSOSIG00000011669(CACNA1A);ENSOSIG00000017772(KCNQ3);ENSOSIG00000020333(ADCY8);ENSOSIG00000020354(KCNJ2);ENSOSIG00000020358(CACNA1B);ENSOSIG00000022256(Camk4);ENSOSIG00000023112(ADCY1);MSTRG.17523(CHRM4);MSTRG…	K05858+K04850+K04130+K04456+K04344+K04851+K04850+K04344+K04928+K08048+K05007+K04849+K05869+K08041+K04132+K04857+K04853+K04849
Organismal Systems	Endocrine system	Insulin secretion	15	157	0.00125502	0.0139446	ko04911	ENSOSIG00000000399(PLCB4);ENSOSIG00000004013(Cacna1c);ENSOSIG00000008429(CACNA1D);ENSOSIG00000009981(PCLO);ENSOSIG00000010340(Cacna1c);ENSOSIG00000015437(KCNN3);ENSOSIG00000018373(PCLO);ENSOSIG00000020333(ADCY8);ENSOSIG00000021070(PCLO);ENSOSIG00000023112(ADCY1);ENSOSIG00000023146(Rims2);MSTRG.32420(CACNA1S);MSTRG.36205(Cacna1f);MSTRG.8316(RYR2);MSTRG.8317(Ryr2)	K05858+K04850+K04851+K16882+K04850+K04944+K16882+K08048+K16882+K08041+K15297+K04857+K04853+K04962+K04962
Human Diseases	Substance dependence	Cocaine addiction	10	83	0.00144319	0.0154628	ko05030	ENSOSIG00000003705(GRIN1);ENSOSIG00000003827(GRIN1);ENSOSIG00000005889(grin2a);ENSOSIG00000008764(GRIN2D);ENSOSIG00000013406(Cdk5r1);ENSOSIG00000017991(Grin2b);ENSOSIG00000018555(Grin2c);ENSOSIG00000019691(Cdk5r1);ENSOSIG00000021674(Grin2b);MSTRG.14363(Grin2d)	K05208+K05208+K05209+K05212+K11716+K05210+K05211+K11716+K05210+K05212
Metabolism	Metabolism of other amino acids	Glutathione metabolism	9	72	0.00190602	0.0197174	ko00480	ENSOSIG00000000871(GPX7);ENSOSIG00000001505(GSTF14);ENSOSIG00000003175(--);ENSOSIG00000003468(gpx8);ENSOSIG00000005423(GSTK1);ENSOSIG00000010511(GSTA4);ENSOSIG00000011126(MGST1);ENSOSIG00000013407(GSTT4);ENSOSIG00000022777(GSTM3)	K00432+K00799+K00799+K00432+K13299+K00799+K00799+K00799+K00799
Environmental Information Processing	Signal transduction	cGMP-PKG signaling pathway	20	258	0.00281315	0.0281316	ko04022	ENSOSIG00000000399(PLCB4);ENSOSIG00000004013(Cacna1c);ENSOSIG00000005595(AKT3);ENSOSIG00000008429(CACNA1D);ENSOSIG00000010340(Cacna1c);ENSOSIG00000011160(mef2d);ENSOSIG00000012300(SLC25A4);ENSOSIG00000013311(ATP2B1);ENSOSIG00000014309(PDE3A);ENSOSIG00000014469(SLC8A1);ENSOSIG00000015495(ATP2B2);ENSOSIG00000018976(PDE5A);ENSOSIG00000020087(GUCY1A2);ENSOSIG00000020333(ADCY8);ENSOSIG00000022876(CALM…	K05858+K04850+K04456+K04851+K04850+K09262+K05863+K05850+K19021+K05849+K05850+K13762+K12318+K08048+K02183+K08041+K19477+K16172+K04857+K04853
Organismal Systems	Nervous system	Synaptic vesicle cycle	13	144	0.00425224	0.0411507	ko04721	ENSOSIG00000001003(SLC6A1);ENSOSIG00000007618(CACNA1A);ENSOSIG00000011669(CACNA1A);ENSOSIG00000014173(Rims1);ENSOSIG00000015575(ATP6V1E1);ENSOSIG00000015761(Dnm1);ENSOSIG00000016354(slc17a6b);ENSOSIG00000016475(STX1B);ENSOSIG00000020358(CACNA1B);ENSOSIG00000021103(UNC13A);ENSOSIG00000023578(RIMS1);MSTRG.21267(Unc13a);MSTRG.6287(CACNA1B)	K05034+K04344+K04344+K15291+K02150+K01528+K12302+K08486+K04849+K15293+K15291+K15293+K04849
Organismal Systems	Endocrine system	Cortisol synthesis and secretion	10	97	0.00460056	0.0431303	ko04927	ENSOSIG00000000399(PLCB4);ENSOSIG00000001212(CACNA1H);ENSOSIG00000004013(Cacna1c);ENSOSIG00000008429(CACNA1D);ENSOSIG00000010340(Cacna1c);ENSOSIG00000016978(Cacna1i);ENSOSIG00000020333(ADCY8);ENSOSIG00000023112(ADCY1);MSTRG.32420(CACNA1S);MSTRG.36205(Cacna1f)	K05858+K04855+K04850+K04851+K04850+K04856+K08048+K08041+K04857+K04853
